# Supplementary material for: A Computational Approach to Identifying Gene-microRNA Modules in Cancer
Source: PubMed Central journal article supplement (PMC4303261; doi:10.1371/journal.pcbi.1004042), 2015-01-22
Supplement: pcbi.1004042.s009.pdf [file pcbi.1004042.s009.pdf]

**Table S2. MiRNAs in ovarian cancer modules.**

| Module ID | microRNAs                                                                                                                                                                                                                                                                            |
|-----------|--------------------------------------------------------------------------------------------------------------------------------------------------------------------------------------------------------------------------------------------------------------------------------------|
| 1         | miR-30d, miR-151, miR-30b, miR-221, miR-23b, miR-331, miR-222, miR-9, miR-24, miR-378, miR-338                                                                                                                                                                                       |
| 2         | miR-142, miR-150, miR-146a, miR-155, miR-223, miR-452, miR-185, miR-22, miR-21, miR-224, miR-218, miR-140, miR-342, miR-147b, miR-335, miR-20a, miR-514, miR-125b, miR-96, miR-507, miR-29b, miR-29c, miR-506, miR-17                                                                |
| 3         | miR-18b, miR-29a, miR-18a, miR-93, miR-768, miR-25, miR-15b, miR-7, miR-106b, miR-301a, miR-19a, miR-29b, miR-130b, miR-301b,                                                                                                                                                        |
| 4         | miR-34c, miR-449a, miR-449b, miR-34b, miR-508, miR-509                                                                                                                                                                                                                               |
| 5         | miR-30d, miR-151, miR-30b, miR-221                                                                                                                                                                                                                                                   |
| 6         | miR-29a, miR-18b, miR-768, miR-18a, miR-93, miR-29b, miR-15b, miR-7, miR-25, miR-301a, miR-29c, miR-101, miR-19a, miR-20b, miR-130b, miR-106b, miR-26a, miR-17, miR-301b, miR-934                                                                                                    |
| 7         | miR-30d, miR-30b, miR-151, miR-221, miR-23b, miR-331, miR-222                                                                                                                                                                                                                        |
| 8         | miR-22, miR-152, miR-214, miR-409, miR-199a, miR-382, miR-199b, miR-508                                                                                                                                                                                                              |
| 9         | miR-30e, miR-324                                                                                                                                                                                                                                                                     |
| 10        | miR-200c, miR-141, let-7b, miR-142, miR-21, miR-452, miR-224, miR-146a, miR-106b                                                                                                                                                                                                     |
| 11        | miR-130a, miR-22, let-7b                                                                                                                                                                                                                                                             |
| 12        | miR-18b, miR-93                                                                                                                                                                                                                                                                      |
| 13        | miR-18b, miR-18a, miR-93, miR-768, miR-29a, miR-7, miR-301a, miR-25                                                                                                                                                                                                                  |
| 14        | miR-29b, miR-149, miR-218, miR-142, miR-130a, miR-125b                                                                                                                                                                                                                               |
| 15        | let-7b, miR-9, miR-142, miR-20a, miR-29b                                                                                                                                                                                                                                             |
| 16        | miR-27a, miR-23a, miR-181d, miR-24, miR-629                                                                                                                                                                                                                                          |
| 17        | miR-29a, let-7b, miR-93, miR-29b, miR-148b, miR-301a, miR-301b                                                                                                                                                                                                                       |
| 18        | miR-18b, miR-29a, miR-768, miR-93, miR-18a, miR-15b, miR-25                                                                                                                                                                                                                          |
| 19        | miR-222, let-7b, miR-20a, miR-218, miR-17, miR-934, miR-301a, miR-130a                                                                                                                                                                                                               |
| 20        | miR-18b, miR-18a, miR-29a, miR-768, miR-15b, miR-19a, miR-7, miR-93, miR-29b, miR-26a, miR-17, miR-301a, miR-101                                                                                                                                                                     |
| 21        | miR-142, miR-150, miR-146a, miR-155, miR-452, miR-223, miR-185, miR-224, miR-22, miR-21, miR-140, miR-342, miR-218, miR-514, miR-507, miR-506, miR-96                                                                                                                                |
| 22        | miR-22, miR-152, miR-214, miR-409, miR-508, miR-514                                                                                                                                                                                                                                  |
| 23        | miR-17, let-7b                                                                                                                                                                                                                                                                       |
| 24        | miR-154, miR-376c, miR-376a, miR-377, miR-299, miR-381, miR-495, miR-127, miR-337, miR-411, miR-410, miR-376b, miR-543, miR-432, miR-145, miR-136                                                                                                                                    |
| 25        | miR-18b, miR-29a, miR-18a, miR-768, miR-93, miR-15b, miR-25, miR-7                                                                                                                                                                                                                   |
| 26        | miR-18b, miR-18a, miR-29a, miR-768, miR-7, miR-93, miR-26a, miR-19a, miR-301a, miR-564, miR-29b, miR-15b, miR-101, miR-25, miR-139, let-7b, miR-17                                                                                                                                   |
| 27        | miR-22, miR-214, miR-152, miR-409, miR-199a, miR-382, miR-199b, miR-127, miR-431, miR-379, miR-508, miR-145                                                                                                                                                                          |
| 28        | miR-452, miR-27a, miR-23a                                                                                                                                                                                                                                                            |
| 29        | miR-30e, miR-30c, miR-324, miR-93, miR-768                                                                                                                                                                                                                                           |
| 30        | miR-219, let-7b, miR-106b, miR-107, miR-93, miR-301a, miR-25, miR-324, miR-564, miR-18b, miR-139, miR-20b, miR-301b                                                                                                                                                                  |
| 31        | miR-142, miR-150, miR-146a, miR-155, miR-218, miR-452, miR-185, miR-224, miR-22, miR-335, miR-20a, miR-29c, miR-21, miR-125b, miR-223, miR-17, miR-222, miR-140, miR-29b, miR-149, miR-130a, miR-20b, miR-183                                                                        |
| 32        | miR-222, miR-25, let-7b, miR-934, miR-221, miR-218                                                                                                                                                                                                                                   |
| 33        | miR-18b, miR-18a, miR-29a, miR-768, miR-15b, miR-7, miR-19a, miR-93, miR-29b, miR-26a, miR-101, miR-301a, miR-17, miR-16, miR-25, miR-130b, miR-29c, miR-20b, miR-564, miR-628, miR-425, miR-106b, miR-139, miR-301b, miR-934, miR-512, miR-455, let-7b, miR-663, miR-146b, miR-548c |
