# Supplementary material for: A Computational Approach to Identifying Gene-microRNA Modules in Cancer
Source: PubMed Central journal article supplement (PMC4303261; doi:10.1371/journal.pcbi.1004042), 2015-01-22
Supplement: pcbi.1004042.s011.pdf [file pcbi.1004042.s011.pdf]

Table S4. MiRNAs in GBM modules.

| Module ID | microRNAs                                                                                                                                                                                                                                                                                                                                                                                           |
|-----------|-----------------------------------------------------------------------------------------------------------------------------------------------------------------------------------------------------------------------------------------------------------------------------------------------------------------------------------------------------------------------------------------------------|
| 1         | miR-19a, miR-19b, miR-222, miR-17, miR-34b, miR-454, miR-130b, miR-22                                                                                                                                                                                                                                                                                                                               |
| 2         | miR-130b, miR-93, miR-106b, miR-15b, miR-29a, miR-19b, miR-17, miR-19a, miR-106a, miR-29b, miR-25, miR-18a, miR-20b, miR-20a, miR-29c, miR-92, miR-22, miR-454, miR-18b, miR-34b, miR-34a, miR-222, miR-152, miR-10b, miR-223, miR-550, miR-363, miR-30a, miR-16                                                                                                                                    |
| 3         | miR-22, miR-483                                                                                                                                                                                                                                                                                                                                                                                     |
| 4         | miR-146b, miR-155, miR-142, miR-34a, miR-193a, miR-19b                                                                                                                                                                                                                                                                                                                                              |
| 5         | miR-130b, miR-93, miR-106b, miR-29a                                                                                                                                                                                                                                                                                                                                                                 |
| 6         | miR-219, miR-338, miR-330, miR-124a, miR-139, miR-128b, miR-128a, miR-137, miR-218, miR-29c, miR-129, miR-138                                                                                                                                                                                                                                                                                       |
| 7         | miR-130b, miR-93, miR-106b, miR-15b, miR-17, miR-19b, miR-106a, miR-19a, miR-25, miR-18a, miR-29a, miR-20a, miR-29b                                                                                                                                                                                                                                                                                 |
| 8         | miR-223, miR-21, miR-142, miR-22, miR-9, miR-146b, miR-222, miR-155, miR-34a, miR-181d, miR-33, miR-181a, miR-193a, miR-34b, miR-221, miR-19b, miR-181c, miR-17, miR-301, miR-19a, miR-128b, miR-181b, miR-95, miR-93                                                                                                                                                                               |
| 9         | miR-338, miR-128b, miR-222, miR-27a, miR-124a, miR-23a, miR-128a, miR-219, miR-138, miR-152, miR-155, miR-139, miR-221, miR-204, miR-340, miR-34a, miR-10b, miR-181a, miR-7, miR-342, miR-577, miR-504, miR-34b, miR-17, miR-146b, miR-19b, miR-106a, miR-20b, miR-301, miR-93, miR-181b, miR-22, miR-223, miR-363, miR-18a, miR-501, miR-20a, miR-181d, miR-19a, miR-324, miR-193a, miR-153, miR-9 |
| 10        | miR-130b, miR-15b, miR-93, miR-19b, miR-19a, miR-17, miR-106b, miR-29a, miR-29b, miR-29c, miR-106a, miR-18a, miR-20a, miR-454, miR-92, miR-20b, miR-25, miR-22                                                                                                                                                                                                                                      |
| 11        | miR-34a, miR-222, miR-221, miR-155, miR-21, miR-34b, miR-27a                                                                                                                                                                                                                                                                                                                                        |
| 12        | miR-214, miR-199a, miR-145, miR-143, miR-422b, miR-128a, miR-129                                                                                                                                                                                                                                                                                                                                    |
| 13        | miR-130b, miR-93, miR-15b, miR-19b, miR-106b, miR-19a, miR-17, miR-106a, miR-20a                                                                                                                                                                                                                                                                                                                    |
| 14        | miR-21, miR-222, miR-155, miR-223, miR-128b, miR-210, miR-128a, miR-221, miR-9, miR-34a, miR-181c, miR-142, miR-33, miR-22, miR-146b, miR-181a, miR-95, miR-181d, miR-214, miR-139, miR-23a, miR-488, miR-34b, miR-187                                                                                                                                                                              |
| 15        | miR-130b, miR-93, miR-17, miR-19b, miR-152, miR-29a, miR-22, miR-106a, miR-222, miR-19a, miR-106b, miR-20a                                                                                                                                                                                                                                                                                          |
| 16        | miR-130b, miR-93, miR-15b, miR-106b, miR-19b, miR-29a, miR-17, miR-19a, miR-29b, miR-106a, miR-18a, miR-25, miR-29c, miR-20a, miR-92                                                                                                                                                                                                                                                                |
| 17        | miR-214, miR-199a, miR-21, miR-9, miR-128b, miR-128a, miR-181c, miR-223, miR-422b, miR-95, miR-488, miR-155, miR-101, miR-145, miR-222, miR-33, miR-129, miR-30c, miR-199b, miR-210, miR-598, miR-181d, miR-181a, miR-769, miR-143                                                                                                                                                                  |
| 18        | miR-222, miR-128b, miR-155, miR-221                                                                                                                                                                                                                                                                                                                                                                 |
| 19        | miR-124a, miR-129, miR-7, miR-139, miR-128b, miR-218                                                                                                                                                                                                                                                                                                                                                |
| 20        | miR-124a, miR-129, miR-7, miR-139, miR-218, miR-137, miR-128b, miR-128a, miR-203, miR-433, miR-132, miR-323, miR-329, miR-338, miR-485, miR-410, miR-219, miR-504, miR-29c, miR-330, miR-138, miR-383, miR-769, miR-214, miR-629, miR-517c, miR-210, miR-422b, miR-381, miR-23a, miR-155                                                                                                            |
| 21        | miR-21, miR-222, miR-155, miR-221, miR-34a, miR-223, miR-128b, miR-128a, miR-210, miR-181c, miR-139, miR-181a, miR-146b, miR-142, miR-504, miR-27a, miR-22, miR-129, miR-33, miR-23a, miR-9, miR-34b, miR-95, miR-301, miR-101, miR-187, miR-181d, miR-214, miR-422b, miR-181b, miR-99a, miR-124a, miR-199a                                                                                         |
| 22        | miR-142, miR-223, miR-21, miR-22, miR-146b, miR-34a, miR-181d, miR-9, miR-222, miR-155, miR-33, miR-34b, miR-181c, miR-181a, miR-193a, miR-19b, miR-221, miR-93, miR-17, miR-130b, miR-301, miR-106b, miR-181b, miR-92, miR-19a, miR-106a, miR-95, miR-20a, miR-185, miR-25                                                                                                                         |
| 23        | miR-124a, miR-7, miR-128b, miR-139                                                                                                                                                                                                                                                                                                                                                                  |
| 24        | miR-142, miR-223, miR-21, miR-34a, miR-146b, miR-155, miR-181d, miR-22, miR-181c, miR-222, miR-34b, miR-181a, miR-221, miR-9                                                                                                                                                                                                                                                                        |
| 25        | miR-21, miR-223, miR-142, miR-155, miR-222, miR-22, miR-34a, miR-9, miR-146b, miR-33, miR-221, miR-181a, miR-128b, miR-210, miR-34b, miR-128a, miR-181d, miR-193a, miR-181c, miR-301, miR-17, miR-181b, miR-95, miR-19b, miR-23a, miR-488, miR-19a, miR-93, miR-20b, miR-363, miR-106a, miR-153, miR-27a                                                                                            |
| 26        | miR-9, miR-128b, miR-181d, miR-128a, miR-181a, miR-21, miR-222, miR-155, miR-22, miR-95, miR-23a, miR-193a, miR-98, miR-223, miR-301, miR-340, miR-181c                                                                                                                                                                                                                                             |
| 27        | miR-130b, miR-93, miR-106b, miR-15b, miR-17, miR-29a                                                                                                                                                                                                                                                                                                                                                |
| 28        | miR-142, miR-21, miR-223, miR-34a                                                                                                                                                                                                                                                                                                                                                                   |
| 29        | miR-130b, miR-93, miR-106b, miR-15b, miR-17, miR-19b, miR-29a                                                                                                                                                                                                                                                                                                                                       |

|    |                                                                                                                                                                                                                                                                                                                                                        |
|----|--------------------------------------------------------------------------------------------------------------------------------------------------------------------------------------------------------------------------------------------------------------------------------------------------------------------------------------------------------|
| 30 | miR-142, miR-223, miR-21, miR-22, miR-181d, miR-146b, miR-34a, miR-9, miR-34b, miR-33, miR-222, miR-193a, miR-130b, miR-19b, miR-155, miR-181a, miR-181c, miR-92                                                                                                                                                                                       |
| 31 | miR-142, miR-21, miR-222, miR-155, miR-22                                                                                                                                                                                                                                                                                                              |
| 32 | miR-29a, miR-22, miR-19a                                                                                                                                                                                                                                                                                                                               |
| 33 | miR-222, miR-34a, miR-155, miR-221, miR-34b, miR-21, miR-128b, miR-27a, miR-128a, miR-146b, miR-23a, miR-22, miR-504, miR-181a, miR-223, miR-142, miR-17, miR-340, miR-139, miR-19b, miR-204, miR-301, miR-193a, miR-19a, miR-181b, miR-152, miR-92, miR-181d, miR-181c, miR-9, miR-106a, miR-342, miR-338, miR-33, miR-93, miR-20b, miR-20a, miR-148a |
| 34 | miR-22, miR-29a, miR-19a, miR-19b                                                                                                                                                                                                                                                                                                                      |
| 35 | miR-155, miR-128b, miR-222, miR-128a, miR-139, miR-504, miR-221, miR-21, miR-34a, miR-129, miR-27a, miR-210, miR-219, miR-124a, miR-338, miR-23a, miR-101, miR-223, miR-204, miR-491, miR-422b, miR-342, miR-34b, miR-181c, miR-340                                                                                                                    |
| 36 | miR-19a, miR-19b, miR-93, miR-17, miR-22, miR-222, miR-20a, miR-130b, miR-301, miR-106a, miR-9, miR-20b, miR-181d, miR-223, miR-34b                                                                                                                                                                                                                    |
| 37 | miR-130b, miR-93, miR-106b, miR-15b, miR-19b, miR-29a, miR-17, miR-19a, miR-29b, miR-25, miR-106a, miR-18a, miR-29c, miR-20a                                                                                                                                                                                                                           |
| 38 | miR-9, miR-181d, miR-128b, miR-128a, miR-181a, miR-21                                                                                                                                                                                                                                                                                                  |
| 39 | miR-128b, miR-128a, miR-9, miR-21, miR-155, miR-95, miR-181d, miR-181a, miR-598, miR-214, miR-98, miR-124a, miR-139, miR-181c, miR-222, miR-193a, miR-187, miR-23a, miR-488, miR-199a, miR-22                                                                                                                                                          |
| 40 | miR-130b, miR-93, miR-29a                                                                                                                                                                                                                                                                                                                              |
| 41 | miR-21, miR-223, miR-142, miR-9, miR-22, miR-181d, miR-155, miR-146b, miR-222, miR-33, miR-181c, miR-181a, miR-34a, miR-193a, miR-488, miR-95, miR-210, miR-34b, miR-301, miR-128b, miR-221, miR-128a, miR-19b, miR-17, miR-181b                                                                                                                       |
| 42 | miR-222, miR-155                                                                                                                                                                                                                                                                                                                                       |
| 43 | miR-130b, miR-93, miR-106b, miR-15b, miR-17, miR-19b, miR-25, miR-29a, miR-18a                                                                                                                                                                                                                                                                         |
| 44 | miR-130b, miR-17, miR-93, miR-20a                                                                                                                                                                                                                                                                                                                      |
| 45 | miR-22, miR-29a                                                                                                                                                                                                                                                                                                                                        |
| 46 | miR-19b, miR-19a, miR-22, miR-17, miR-29a                                                                                                                                                                                                                                                                                                              |
| 47 | miR-29a, miR-22                                                                                                                                                                                                                                                                                                                                        |
| 48 | miR-142, miR-34a, miR-22, miR-223, miR-21, miR-222, miR-146b, miR-155                                                                                                                                                                                                                                                                                  |
| 49 | miR-142, miR-223, miR-21, miR-22, miR-34a                                                                                                                                                                                                                                                                                                              |
| 50 | miR-9, miR-181d, miR-22, miR-181a, miR-222, miR-21, miR-93, miR-17, miR-223, miR-152, miR-20a, miR-128b, miR-20b, miR-142, miR-155, miR-193a, miR-181b                                                                                                                                                                                                 |
| 51 | miR-142, miR-223, miR-21, miR-22, miR-34a, miR-146b, miR-181d, miR-9, miR-34b, miR-222, miR-130b, miR-33, miR-193a, miR-19b, miR-181a, miR-155, miR-92                                                                                                                                                                                                 |
| 52 | miR-124a, miR-128b, miR-128a, miR-23a, miR-27a, miR-338, miR-222, miR-139, miR-138, miR-155, miR-7, miR-219, miR-10b, miR-152, miR-221, miR-340, miR-204, miR-34a, miR-504, miR-181a, miR-137                                                                                                                                                          |
| 53 | miR-128b, miR-9                                                                                                                                                                                                                                                                                                                                        |
| 54 | miR-142, miR-181d, miR-223, miR-21, miR-9, miR-181a, miR-22, miR-222, miR-199a, miR-155                                                                                                                                                                                                                                                                |
