# Supplementary material for: A Computational Approach to Identifying Gene-microRNA Modules in Cancer
Source: PubMed Central journal article supplement (PMC4303261; doi:10.1371/journal.pcbi.1004042), 2015-01-22
Supplement: pcbi.1004042.s012.pdf [file pcbi.1004042.s012.pdf]

**Table S5. Cancer genes, ovarian cancer genes and ovarian cancer miRNAs in modules.**

| Module ID | Cancer Genes                                                                                                          | Num   | Ovarian Cancer Genes                | Num  | Ovarian Cancer microRNAs                                                                         | Num   |
|-----------|-----------------------------------------------------------------------------------------------------------------------|-------|-------------------------------------|------|--------------------------------------------------------------------------------------------------|-------|
| 1         | BOP1                                                                                                                  | 1/25  | PTK2                                | 1/25 | miR-151, miR-30b, miR-30d, miR-338, miR-9                                                        | 5/11  |
| 2         | CD44, MMP9, PLAUR, LTB, GBP1, CTSH, EPB41L3, POU2AF1, VAV1, CXCL10, MEF2C, HCK, BTK, CASP1, CD74, LCK, LYN, FGR, SPP1 | 19/60 | CD44, DPYD, IL18, MMP9, PLAUR       | 5/60 | miR-125b, miR-146a, miR-155, miR-17, miR-20a, miR-21, miR-218, miR-22, miR-223, miR-224, miR-335 | 11/24 |
| 3         | CDK2, E2F1, PLK1, MCM2, CDC6, EZH2, ASPM, BUB1                                                                        | 8/35  | CDK2, E2F1                          | 2/35 | miR-106b, miR-130b, miR-18a, miR-19a, miR-25, miR-29a, miR-93                                    | 7/14  |
| 4         |                                                                                                                       | 0/48  | DLEC1                               | 1/48 | miR-34b, miR-34c, miR-449a, miR-449b                                                             | 4/6   |
| 5         | BOP1, PPP1R14B                                                                                                        | 2/30  | PTK2                                | 1/30 | miR-151, miR-30b, miR-30d                                                                        | 3/4   |
| 6         | BARD1, CDC25A, CDK2, MSH6, MCM2, BUB1, FEN1, PCNA, CDKN3                                                              | 9/34  | BARD1, CDC25A, CDK2, MKI67, MSH6    | 5/34 | miR-101, miR-106b, miR-130b, miR-17, miR-18a, miR-19a, miR-20b, miR-25, miR-29a, miR-93          | 10/20 |
| 7         | BOP1, RECQL4                                                                                                          | 2/25  | PTK2                                | 1/25 | miR-151, miR-30b, miR-30d                                                                        | 3/7   |
| 8         | PLAUR, MMP11, BGN, COL16A1, THBS2, THBS1, VCAN, COL1A1, TIMP3, PDGFRB, COL1A2                                         | 11/39 | FN1, LGALS1, PLAUR, PLAUR, SERPINE1 | 5/39 | miR-152, miR-199a, miR-214, miR-22                                                               | 4/8   |
| 9         | ACVR2A, RLF                                                                                                           | 2/18  | ACVR2A                              | 1/18 |                                                                                                  | 0/2   |
| 10        | CD74, NCAPD2, FOXM1, RAD52                                                                                            | 4/13  |                                     | 0/13 | let-7b, miR-106b, miR-141, miR-146a, miR-200c, miR-21, miR-224                                   | 7/9   |
| 11        | TBX2                                                                                                                  | 1/13  |                                     | 0/13 | let-7b, miR-130a, miR-22                                                                         | 3/3   |
| 12        | E2F3, MCM2, FEN1, DEK, PALB2, PSMA5                                                                                   | 6/33  | E2F3, NBN                           | 2/33 | miR-93                                                                                           | 1/2   |
| 13        | CDC42, PLK1, CDC6, BUB1, PCNA, UCHL5, FANCE, SMARCB1, FANCG, EIF4EBP1, ECT2                                           | 11/78 | CDC42                               | 1/78 | miR-18a, miR-25, miR-29a, miR-93                                                                 | 4/8   |
| 14        | CAMTA1, DBN1, SOX11, POU2F2, BCL3, MAPK7                                                                              | 6/25  | MAP3K4                              | 1/25 | miR-125b, miR-130a, miR-218                                                                      | 3/6   |
| 15        | SOX11, BCL3, RHOTB1, NDRG1                                                                                            | 4/35  | INSR                                | 1/35 | let-7b, miR-20a, miR-9                                                                           | 3/5   |
| 16        | GADD45GIP1, EPS15L1                                                                                                   | 2/25  |                                     | 0/25 | miR-27a, miR-629                                                                                 | 2/5   |
| 17        | C11orf30, MSH2, CTSH, RLF, NCAPD2, MARS, PPFIBP1, MYBL2                                                               | 8/29  | C11orf30, MSH2                      | 2/29 | let-7b, miR-148b, miR-29a, miR-93                                                                | 4/7   |
| 18        | MCM2, FEN1, FOXM1, DEK, FANCG, WHSC1                                                                                  | 6/31  | MKI67                               | 1/31 | miR-18a, miR-25, miR-29a, miR-93                                                                 | 4/7   |
| 19        | CD82, CTSB, ZDHHC18, ALS2CL, ETV6, PRKCD, MAPKAPK2, TFEB, PML                                                         | 9/25  | CD82, CTSB, MAP3K3                  | 3/25 | let-7b, miR-130a, miR-17, miR-20a, miR-218                                                       | 5/8   |
| 20        | AURKA, CDC20, MAD2L1, TOP2A, PLK1, ASPM, BUB1, FOXM1, MYBL2, KIF14, CCNA2, CCNB1, BUB1B                               | 13/44 | AURKA, CDC20, MAD2L1, TOP2A         | 4/44 | miR-101, miR-17, miR-18a, miR-19a, miR-29a, miR-93                                               | 6/13  |
| 21        | HCK, BTK, LCK, IL2RG, IL2RB, ITK, CCR1, LAPTM5                                                                        | 8/30  |                                     | 0/30 | miR-146a, miR-155, miR-21, miR-218, miR-22, miR-223, miR-224                                     | 7/17  |
| 22        | MMP2, MMP11, THBS2, VCAN, COL1A1, LOXL2, ADAM12, DPT, ECM1                                                            | 9/27  | FN1, MMP1, MMP2, PLAUR, SPARC       | 5/27 | miR-152, miR-214, miR-22                                                                         | 3/6   |
| 23        | RBBP5, NUP133                                                                                                         | 2/19  | ARID4B                              | 1/19 | let-7b, miR-17                                                                                   | 2/2   |
| 24        | PDGFRA                                                                                                                | 1/19  | PDGFRA                              | 1/19 | miR-127, miR-145, miR-376c                                                                       | 3/16  |
| 25        | MCM2, FEN1, PCNA, MYBL2, FBXO5                                                                                        | 5/29  |                                     | 0/29 | miR-18a, miR-25, miR-29a, miR-93                                                                 | 4/8   |

|    |                                                                                                                                             |       |                                                                 |      |                                                                                                                              |       |
|----|---------------------------------------------------------------------------------------------------------------------------------------------|-------|-----------------------------------------------------------------|------|------------------------------------------------------------------------------------------------------------------------------|-------|
| 26 | MAD2L1, PLK1, FEN1, PCNA, UCHL5, CCNA2, CCNB1, FBXO5, RAPIGDS1, RAN                                                                         | 10/44 | MAD2L1                                                          | 1/44 | let-7b, miR-101, miR-17, miR-18a, miR-19a, miR-25, miR-29a, miR-93                                                           | 8/17  |
| 27 | MMP14, MMP2, MMP11, BGN, COL16A1, THBS2, THBS1, VCAN, COL1A1, PDGFRB, COL1A2, LOXL2, ADAM12, ECM1, COL11A1, TWIST1, SFRP4, LOX, TAGLN, LHFP | 20/55 | FN1, MMP14, MMP2, PLAU, SERPINF1, SPARC                         | 6/55 | miR-127, miR-145, miR-152, miR-199a, miR-214, miR-22                                                                         | 6/12  |
| 28 | DNMT1, HMGA1, NRF1, SMARCA4                                                                                                                 | 4/37  | DNMT1, HMGA1, LGALS1                                            | 3/37 | miR-27a                                                                                                                      | 1/3   |
| 29 | MYCL1, RLF, YBX1                                                                                                                            | 3/23  | MYCL1                                                           | 1/23 | miR-30c, miR-93                                                                                                              | 2/5   |
| 30 | PBX2, DAXX                                                                                                                                  | 2/26  |                                                                 | 0/26 | let-7b, miR-106b, miR-20b, miR-219, miR-25, miR-93                                                                           | 6/13  |
| 31 | CD82, CTSB, STAT3, TNFSF10, GBP1, EPB41L3, CXCL10, CASP1, LYN, SPP1, LAPTM5, IRF1, CTSL1, TACCL1, S100A13, CAPG                             | 16/65 | ACVR2B, CD82, CTSB, CTSD, DPYD, RAB25, SERPINF1, STAT3, TNFSF10 | 9/65 | miR-125b, miR-130a, miR-146a, miR-155, miR-17, miR-183, miR-20a, miR-20b, miR-21, miR-218, miR-22, miR-223, miR-224, miR-335 | 14/23 |
| 32 | CD82, TMPRSS4, ETV4, ANXA1, S100A14, S100P, ITGB4                                                                                           | 7/25  | CD82, RAB25                                                     | 2/25 | let-7b, miR-218, miR-25                                                                                                      | 3/6   |
| 33 | AURKA, CDC20, TOP2A, PLK1, ASPM, BUB1, FOXM1, ECT2, KIF14, CCNA2, BUB1B, FBXO5, UBE2C, TK1, CENPF, TACC3, CKS2                              | 17/57 | AURKA, CDC20, MKI67, TOP2A                                      | 4/57 | let-7b, miR-101, miR-106b, miR-130b, miR-146b, miR-16, miR-17, miR-18a, miR-19a, miR-20b, miR-25, miR-29a, miR-93            | 13/31 |
