# Supplementary material for: A Computational Approach to Identifying Gene-microRNA Modules in Cancer
Source: PubMed Central journal article supplement (PMC4303261; doi:10.1371/journal.pcbi.1004042), 2015-01-22
Supplement: pcbi.1004042.s013.pdf [file pcbi.1004042.s013.pdf]

**Table S6. Cancer genes, GBM genes and GBM miRNAs in modules.**

| Module ID | Cancer Genes                                                                                                                                                                    | Num    | GBM Genes                  | Num   | GBM microRNAs                                                                                                                                                                                                 | Num   |
|-----------|---------------------------------------------------------------------------------------------------------------------------------------------------------------------------------|--------|----------------------------|-------|---------------------------------------------------------------------------------------------------------------------------------------------------------------------------------------------------------------|-------|
| 1         | KRAS, RAPIGDS1, CORO1C, PPP1CC                                                                                                                                                  | 4/33   | KRAS                       | 1/33  | miR-19a, miR-19b, miR-22, miR-222                                                                                                                                                                             | 4/9   |
| 2         | BUB1, FBXO5, ASPM, PLK1, KIF14, MYBL2, AURKA, MCM2, FOXM1, ECT2, CDC6, BUB1B, CDC25C, STIL, CENPF, TOP2A, CCNA2, EZH2, CDC20, MAD2L1, MYBL1, TACC3, FGF9, BCOR, CDT1, BRCA1     | 26/98  | CDC25C, BRCA1              | 2/98  | miR-106a, miR-106b, miR-10b, miR-15b, miR-16, miR-18a, miR-18b, miR-19a, miR-19b, miR-20a, miR-20b, miR-22, miR-222, miR-25, miR-29a, miR-29c, miR-34a, miR-93                                                | 18/30 |
| 3         | PRPF4B, ATM, DST, ARHGEF4, AKAP9, ATR, CHFR, PIK3R1, RAD9A, GSK3B, TOP2B, RBBP6, NFATC3, BCL6, CYLD, TSC2                                                                       | 16/101 | ATM, PIK3R1, GSK3B, TSC2   | 4/101 | miR-22                                                                                                                                                                                                        | 1/2   |
| 4         | EIF2AK2, GBP1, CXCL10, TAP1, XAF1, SP110, TNFSF10                                                                                                                               | 7/41   |                            | 0/41  | miR-146b, miR-155, miR-193a, miR-19b, miR-34a                                                                                                                                                                 | 5/7   |
| 5         | FBXO5, ASPM, PLK1, KIF14, MYBL2, MCM2, FOXM1, CDK2, BUB1B, CENPF, TOP2A, EZH2, TACC3, FANCC                                                                                     | 14/56  | CDK2                       | 1/56  | miR-106b, miR-29a, miR-93                                                                                                                                                                                     | 3/4   |
| 6         | ENPP2, MAL, NPY                                                                                                                                                                 | 3/23   |                            | 0/23  | miR-137, miR-139, miR-218, miR-29c                                                                                                                                                                            | 4/12  |
| 7         | AURKA, BUB1B, STIL, MAD2L1, FANCE, CCNB1, PCNA, H2AFX, TRAF4, PPP1CC, SFRS3, CECR5                                                                                              | 12/43  |                            | 0/43  | miR-106a, miR-106b, miR-15b, miR-18a, miR-19a, miR-19b, miR-20a, miR-25, miR-29a, miR-93                                                                                                                      | 10/13 |
| 8         | CD44, PLAUR, ICAM1, FOSL2, LYN, PLA2G2A, FCGR2B, PTPN6, MAP3K8, IL4R, BIRC3, SPI1, CCR1, BTK, CTSB, CEBPB, TNFRSF1B, SERPINA1, IL1B, HCK, JUNB, SYK, WAS, TCIRG1                | 24/73  | PLCG2                      | 1/73  | miR-146b, miR-155, miR-181a, miR-181b, miR-181c, miR-181d, miR-193a, miR-19a, miR-19b, miR-21, miR-22, miR-221, miR-222, miR-34a, miR-9, miR-93, miR-95                                                       | 17/26 |
| 9         | SOX4, SATB1, SOX11, HDAC2, OPCML, ELMO1, PEG3, PPP1R16B, FGF12, SOX10, OLIG2, NRXN2, PLCB1, CDK5R1, RAP2A, ERBB3                                                                | 16/70  | ERBB3                      | 1/70  | miR-106a, miR-10b, miR-139, miR-146b, miR-153, miR-155, miR-181a, miR-181b, miR-181d, miR-18a, miR-193a, miR-19a, miR-19b, miR-20a, miR-20b, miR-22, miR-221, miR-222, miR-342, miR-34a, miR-7, miR-9, miR-93 | 23/43 |
| 10        | PLK1, AURKA, MCM2, CDK2, BUB1B, STIL, CDKN3, CCNA2, SKP2, FEN1, FANCG, GMPS, CDT1, MSH6, LYN, MAPK14, CUL4B, NFKB1, PFN1, RAB8A, NONO                                           | 21/73  | CDK2, MSH6                 | 2/73  | miR-106a, miR-106b, miR-15b, miR-18a, miR-19a, miR-19b, miR-20a, miR-20b, miR-22, miR-25, miR-29a, miR-29c, miR-93                                                                                            | 13/19 |
| 11        | TACCI1, CBLC, FGF14, FGF2, CFLAR, BCL2L1, CDKN1A, SHC1, AR, DDB2, ERBB2, CD46, FGFR4, MCL1, RELB, SP110, PXN, TIAM1, RANBP2, MYD88, MCC, JUN, TNFRSF1A, LYL1, MAPK1, CD151, BAX | 27/89  | CDKN1A, SHC1, ERBB2, MAPK1 | 4/89  | miR-155, miR-21, miR-221, miR-222, miR-34a                                                                                                                                                                    | 5/7   |
| 12        | BGN, COL1A1, TBX2, CHFR, TAGLN, CD248, COL1A2, PDGFRB, MYH9, NOTCH3                                                                                                             | 10/47  |                            | 0/47  | miR-143, miR-145                                                                                                                                                                                              | 2/7   |

|    |                                                                                                                                                                                                                                                                                                                                                                                                                                                                           |        |                                            |       |                                                                                                                                                                                                       |       |
|----|---------------------------------------------------------------------------------------------------------------------------------------------------------------------------------------------------------------------------------------------------------------------------------------------------------------------------------------------------------------------------------------------------------------------------------------------------------------------------|--------|--------------------------------------------|-------|-------------------------------------------------------------------------------------------------------------------------------------------------------------------------------------------------------|-------|
| 13 | BUB1, FBXO5, BAK1, STIL, USP39, PCNA, BRMS1, CDK5, MEF2B, PHB, FANCF, ERCC8, RHOC, SMAD4, SFRS3, DHX9, CECR5                                                                                                                                                                                                                                                                                                                                                              | 17/91  |                                            | 0/91  | miR-106a, miR-106b, miR-15b, miR-19a, miR-19b, miR-20a, miR-93                                                                                                                                        | 7/9   |
| 14 | ADAM12, VEGFA, CAV1, GRN, ANG, LOX, SHC1, PLAUR, TIMP1, TPM4, THBS1, CTSL1, IL4R, TGFBI, CTSB, HSPA5                                                                                                                                                                                                                                                                                                                                                                      | 16/65  | SHC1                                       | 1/65  | miR-139, miR-146b, miR-155, miR-181a, miR-181c, miR-181d, miR-21, miR-22, miR-221, miR-222, miR-34a, miR-9, miR-95                                                                                    | 13/25 |
| 15 | TFAP2A, ASPM, PLK1, KIF14, MYBL2, FOXM1, ECT2, CDC6, BUB1B, BRCA2, UBE2C, IGFBP7, CENPF, EEF1A2, TOP2A, SORBS2, E2F1, CDC20, MAD2L1, MYBL1, TACC3, SKP2, HSPB1, SATB1, E2F3, CDC25A, H2AFX, SYNE1, CDT1, ANG, SOX11, FGF14, RHOA, HDAC2, SLC38A1, HOXA7, PDGFRA, SFPQ, HERPUD1, NTRK3, HNRNPA2B1, SLC9A3R1, SIX1, TRAF4, RAP1GAP, OPCML, ELMO1, CUL1, ASL, PEG3, RAP1A, SMARCB1, NOTCH1, CAMKK2, CCND1, EVL, CSPG4, LRP5, COTL1, SOX10, LYL1, CHIC2, OLIG2, NRXN2, NKX2-2 | 65/231 | BRCA2, E2F1, CDC25A, PDGFRA, CCND1, PIK3CG | 6/231 | miR-106a, miR-106b, miR-19a, miR-19b, miR-20a, miR-22, miR-222, miR-29a, miR-93                                                                                                                       | 9/12  |
| 16 | BUB1, ASPM, PLK1, KIF14, MYBL2, AURKA, CDC6, CDK2, BUB1B, BRCA2, CDC25C, STIL, TK1, CCNA2, CDC20, CHEK2, SKP2, CDC25A, FEN1, CDT1, BRCA1                                                                                                                                                                                                                                                                                                                                  | 21/93  | CDK2, BRCA2, CDC25C, CHEK2, CDC25A, BRCA1  | 6/93  | miR-106a, miR-106b, miR-15b, miR-18a, miR-19a, miR-19b, miR-20a, miR-25, miR-29a, miR-29c, miR-93                                                                                                     | 11/15 |
| 17 | BGN, LOXL2, ADAM12, MMP9, COL1A1, LOX, TAGLN, CD248, TPM4, COL1A2, THBS1, PDGFRB, MYH9, TGFBI                                                                                                                                                                                                                                                                                                                                                                             | 14/59  |                                            | 0/59  | miR-101, miR-143, miR-145, miR-155, miR-181a, miR-181c, miR-181d, miR-21, miR-222, miR-30c, miR-9, miR-95                                                                                             | 12/25 |
| 18 | SATB1, THRA, ARHGEF4, CREBBP, ENAH, SIRT1, PGF, SH3GL2, CTNND2, NTRK2, NRXN2, RAP2A                                                                                                                                                                                                                                                                                                                                                                                       | 12/34  |                                            | 0/34  | miR-155, miR-221, miR-222                                                                                                                                                                             | 3/4   |
| 19 | EPHB6, NPY, SH3GL2, CHGA, KIAA0182                                                                                                                                                                                                                                                                                                                                                                                                                                        | 5/48   |                                            | 0/48  | miR-139, miR-218, miR-7                                                                                                                                                                               | 3/6   |
| 20 | EPHB6, NPY, PPP1R16B, CHGA, TAC1, ICAM5                                                                                                                                                                                                                                                                                                                                                                                                                                   | 6/74   |                                            | 0/74  | miR-137, miR-139, miR-155, miR-218, miR-29c, miR-381, miR-7                                                                                                                                           | 7/31  |
| 21 | LOXL2, ADAM12, GRN, LOX, CDKN1A, SHC1, PLAUR, ICAM1, FOSL2, MCL1, TPM4, ADAM9, CTNNA1, SWAP70, TGFBI, HSPA5                                                                                                                                                                                                                                                                                                                                                               | 16/70  | CDKN1A, SHC1                               | 2/70  | miR-101, miR-139, miR-146b, miR-155, miR-181a, miR-181b, miR-181c, miR-181d, miR-21, miR-22, miR-221, miR-222, miR-34a, miR-9, miR-95                                                                 | 15/34 |
| 22 | COL1A1, GRN, RAD52, MERTK, VAV1, CSTA, PLAUR, SIPA1, MAPK13, TIMP1, DAB2, HERPUD1, FXYD5, CSF1, TRAF1, MPP1, MAP3K8, RPS6KA1, MYD88, SPP1, CTSL1, CD53, IL4R, PRKCD, SLC16A3, IFI30, CCR1, ERC2, CTSB, CEBPB, TNFRSF1B, FGR, SERPINA1, HCK, PSAP, ALOX5, SYK, CSF1R, TCIRG1                                                                                                                                                                                               | 39/166 | RPS6KA1, PRKCD, PLCG2                      | 3/166 | miR-106a, miR-106b, miR-146b, miR-155, miR-181a, miR-181b, miR-181c, miR-181d, miR-185, miR-193a, miR-19a, miR-19b, miR-20a, miR-21, miR-22, miR-221, miR-222, miR-25, miR-34a, miR-9, miR-93, miR-95 | 22/32 |

|    |                                                                                                                                                                                                          |        |                     |       |                                                                                                                                                                                                         |       |
|----|----------------------------------------------------------------------------------------------------------------------------------------------------------------------------------------------------------|--------|---------------------|-------|---------------------------------------------------------------------------------------------------------------------------------------------------------------------------------------------------------|-------|
| 23 | FGF9, ELMO1, SH3GL2, CHGA, BCL11A, SCN3B                                                                                                                                                                 | 6/34   |                     | 0/34  | miR-139, miR-7                                                                                                                                                                                          | 2/4   |
| 24 | EML4, GRN, TGFB2, FLI1, NFKB1, TGFB1, MPP1, JAK2, PICALM, PRKCD, LCP1, HCK                                                                                                                               | 12/38  | PRKCD               | 1/38  | miR-146b, miR-155, miR-181a, miR-181c, miR-181d, miR-21, miR-22, miR-221, miR-222, miR-34a, miR-9                                                                                                       | 11/15 |
| 25 | VEGFA, CD44, STAT3, LOX, PLAUR, ICAM1, FOSL2, TPM4, CLIC4, THBS1, PLA2G2A, FCGR2B, MPP1, CTSL1, FLII, BIRC3, SLC16A3, TGFB1, TGFB2, ZFP36L1, ZFP36L2, CTSB, TNFRSF1B, BCL6, KLF6, JUNB                   | 26/75  |                     | 0/75  | miR-106a, miR-146b, miR-153, miR-155, miR-181a, miR-181b, miR-181c, miR-181d, miR-193a, miR-19a, miR-19b, miR-20b, miR-21, miR-22, miR-221, miR-222, miR-34a, miR-9, miR-93, miR-95                     | 20/35 |
| 26 | DBN1, SATB1, THRA, PAWR, CLDN4, SRGAP3, PIK3R1, ICAM1, MXI1, MAP2, NTRK3, BZRAP1, DLGAP1, HIPK2, DAPK1, CTNND2, CEACAM1, NOTCH1, CHD9, APC, HDAC4, TCF12, SPINT1, OLIG2, NRXN2, CDK5R1, RAP2A, NKX2-2    | 28/119 | SHC2, PIK3R1, HIPK2 | 3/119 | miR-155, miR-181a, miR-181c, miR-181d, miR-193a, miR-21, miR-22, miR-222, miR-9, miR-95                                                                                                                 | 10/17 |
| 27 | ASPM, AURKA, MCM2, FOXM1, BUB1B, CDC25C, UBE2C, CENPF, TOP2A, CCNA2, CDC20, MAD2L1, CCNB1, PTTG1                                                                                                         | 14/53  | CDC25C              | 1/53  | miR-106b, miR-15b, miR-29a, miR-93                                                                                                                                                                      | 4/6   |
| 28 | GRN, RAP2B, CAPG, CSTA, PLAUR, SIPA1, VAMP8, GNAI2, FXD5, FCGR2B, IFI30, RHOG, CTSB, TNFRSF1B, SERPINA1, HCK, TGFB1, SYK, TCIRG1                                                                         | 19/55  |                     | 0/55  | miR-21, miR-34a                                                                                                                                                                                         | 2/5   |
| 29 | MCM2, BUB1B, CDKN3, EZH2, PCNA, TCF3, CDKN2C, SFRS3                                                                                                                                                      | 8/30   | CDKN2C              | 1/30  | miR-106b, miR-15b, miR-19b, miR-29a, miR-93                                                                                                                                                             | 5/7   |
| 30 | GRN, CAPG, VAV1, CSTA, SERPINB1, VAMP8, DAB2, LYN, CORO1A, FXD5, CASP1, FCGR2B, PTPN6, CD74, CTSL1, MAFB, CD53, IFI30, SPI1, CCR1, LCP1, CTSB, TNFRSF1B, SERPINA1, HCK, ALOX5, LAPTM5, SYK, CSF1R, C3AR1 | 30/131 | PLCG2               | 1/131 | miR-146b, miR-155, miR-181a, miR-181c, miR-181d, miR-193a, miR-19b, miR-21, miR-22, miR-222, miR-34a, miR-9                                                                                             | 12/19 |
| 31 | ANG, ANXA1, RRAS, CAPG, SERPINB1, LYN, CASP1, ASL, RHOG, SERPINA1                                                                                                                                        | 10/37  |                     | 0/37  | miR-155, miR-21, miR-22, miR-222                                                                                                                                                                        | 4/5   |
| 32 | WHSC1, DEK, DNMT1, EWSR1, TOP1, MSH3, NIPBL, NFIC, HNRNPA2B1, RBBP6, TPR, RANBP2, STAG1, SMARCA4, EIF3A, NCOA6, AKAP13                                                                                   | 17/71  | RPS6KB1, PDPK1      | 2/71  | miR-19a, miR-22, miR-29a                                                                                                                                                                                | 3/3   |
| 33 | LGALS3, VAV3, OSBPL3, IGFBP2, ANG, ANXA1, CSTA, DDB2, PLAUR, PDGFA, TIMP1, CTNNA1, SWAP70, S100A13, TNFRSF1A, MSN, CD151                                                                                 | 17/83  | PDGFA               | 1/83  | miR-106a, miR-139, miR-146b, miR-148a, miR-155, miR-181a, miR-181b, miR-181c, miR-181d, miR-193a, miR-19a, miR-19b, miR-20a, miR-20b, miR-21, miR-22, miR-221, miR-222, miR-342, miR-34a, miR-9, miR-93 | 22/40 |
| 34 | DNMT1, EWSR1, ATF7IP, TOP1, NIPBL, RBBP6, EP400, STAG1                                                                                                                                                   | 8/27   |                     | 0/27  | miR-19a, miR-19b, miR-22, miR-29a                                                                                                                                                                       | 4/4   |
| 35 | ADAM12, VEGFA, IGFBP2, PLAUR, IGFBP3, CD151, HSPA5                                                                                                                                                       | 7/44   |                     | 0/44  | miR-101, miR-139, miR-155, miR-181c, miR-21, miR-221, miR-222, miR-342, miR-34a, miR-491                                                                                                                | 10/25 |

|    |                                                                                                                                                                         |       |                    |      |                                                                                                                                        |       |
|----|-------------------------------------------------------------------------------------------------------------------------------------------------------------------------|-------|--------------------|------|----------------------------------------------------------------------------------------------------------------------------------------|-------|
| 36 | FANCE, RB1CC1, BMI1, PPM1D, TOPORS, SIRT1, CDKN1B                                                                                                                       | 7/81  | CDKN1B             | 1/81 | miR-106a, miR-181d, miR-19a, miR-19b, miR-20a, miR-20b, miR-22, miR-222, miR-9, miR-93                                                 | 10/16 |
| 37 | BUB1, ASPM, KIF14, ECT2, CDC6, CDK2, BUB1B, STIL, CENPF, CCNA2, EZH2, MAD2L1, BRCA1                                                                                     | 13/48 | CDK2, BRCA1        | 2/48 | miR-106a, miR-106b, miR-15b, miR-18a, miR-19a, miR-19b, miR-20a, miR-25, miR-29a, miR-29c, miR-93                                      | 11/14 |
| 38 | SOX11, MAP2, CTNND2, APC, S100B, NKX2-2                                                                                                                                 | 6/52  |                    | 0/52 | miR-181a, miR-181d, miR-21, miR-9                                                                                                      | 4/6   |
| 39 | THRA, SRGAP3, MAPK10, APC2, NTRK3, HIPK2, CTNND2, NCOA1, NRXN2, CDK5R1                                                                                                  | 10/42 | HIPK2              | 1/42 | miR-139, miR-155, miR-181a, miR-181c, miR-181d, miR-193a, miR-21, miR-22, miR-222, miR-9, miR-95                                       | 11/21 |
| 40 | BUB1, ASPM, PLK1, MCM2, CDK2, BUB1B, BRCA2, WHSC1, CENPF, TOP2A, EZH2, TACC3, SKP2, SOX4, FEN1, CDT1, DEK, DNMT1, BRCA1, HDAC2, SFPQ, MYB, FANCC                        | 23/84 | CDK2, BRCA2, BRCA1 | 3/84 | miR-29a, miR-93                                                                                                                        | 2/3   |
| 41 | LOX, CSTA, PLAUR, FOSL2, MAPK13, TIMP1, DAB2, PLA2G2A, MAP3K8, S100A8, CTSL1, MAFB, IL4R, BIRC3, SLC16A3, TGFB1, IL6, CTSB, CEBPB, TNFRSF1B, TNFAIP3, IER3, ALOX5, JUNB | 24/68 |                    | 0/68 | miR-146b, miR-155, miR-181a, miR-181b, miR-181c, miR-181d, miR-193a, miR-19b, miR-21, miR-22, miR-221, miR-222, miR-34a, miR-9, miR-95 | 15/27 |
| 42 | LGALS3, CD44, IGFBP2, ANG, ANXA1, CAPG, PLAUR, TIMP1, S100A13, MSN                                                                                                      | 10/36 |                    | 0/36 | miR-155, miR-222                                                                                                                       | 2/2   |
| 43 | FBXO5, ASPM, AURKA, MCM2, ECT2, BUB1B, UBE2C, STIL, CENPF, CDKN3, TOP2A, EZH2, CDC20, MAD2L1, CCNB1, PTTG1, PCNA, CKS1B, CKS2                                           | 19/54 |                    | 0/54 | miR-106b, miR-15b, miR-18a, miR-19b, miR-25, miR-29a, miR-93                                                                           | 7/9   |
| 44 | PRCC, CSNK2A1, JAG1, ZFP64, ELAVL1, AATF, TH1L, MAD1L1, NONO, TSC2                                                                                                      | 10/43 | TSC2               | 1/43 | miR-20a, miR-93                                                                                                                        | 2/4   |
| 45 | HIP1, DNMT1, EWSR1, XPC, TOP1, GNA11, NIPBL, YES1, CSNK1A1, NBR1, TOP2B, RBBP6, TPR, AATF, ANP32B, STAG1, ERCC5, NCOA6, AKT1, AKAP13, TRIM27                            | 21/95 | AKT1               | 1/95 | miR-22, miR-29a                                                                                                                        | 2/2   |
| 46 | USP39, BCOR, PRPF4B, GSPT1, ANP32A, C11orf30, SUZ12, FUS, TSC2                                                                                                          | 9/60  | TSC2               | 1/60 | miR-19a, miR-19b, miR-22, miR-29a                                                                                                      | 4/5   |
| 47 | CSNK2A1, EIF4G1, ATF7IP, ABL1, TOP1, GNA11, NFIC, HNRNPA2B1, AATF, BRD4, SMARCA4, NCOA6, AKAP13, KEAP1                                                                  | 14/59 |                    | 0/59 | miR-22, miR-29a                                                                                                                        | 2/2   |
| 48 | ANG, ANXA1, S100A10, RRAS, CAPG, CSTA, SERPINB1, YAP1, VAMP8, LYN, CASP1, S100A13, CCR1, RHOG                                                                           | 14/68 |                    | 0/68 | miR-146b, miR-155, miR-21, miR-22, miR-222, miR-34a                                                                                    | 6/9   |
| 49 | MPP1, SPI1, CCR1, CSF3R, HCK, SYK, CSF1R                                                                                                                                | 7/41  |                    | 0/41 | miR-21, miR-22, miR-34a                                                                                                                | 3/6   |
| 50 | DBN1, SOX11, MAP2, TOP2B, DLGAP1, ASCL1, TRIM37, OLIG2, TCL1A, NKX2-2                                                                                                   | 10/49 |                    | 0/49 | miR-155, miR-181a, miR-181b, miR-181d, miR-193a, miR-20a, miR-20b, miR-21, miR-22, miR-222, miR-9, miR-93                              | 12/17 |

|    |                                                                                                                                                              |       |                 |      |                                                                                                   |       |
|----|--------------------------------------------------------------------------------------------------------------------------------------------------------------|-------|-----------------|------|---------------------------------------------------------------------------------------------------|-------|
| 51 | CAPG, CSTA, SERPINB1, VAMP8, LYN, CORO1A, CASP1, RPS6KA1, RAC2, MAFB, CD53, BCL2A1, CCR1, ERC2, CEBPA, SERPINA1, HCK, ALOX5, CD69, LAPTM5, SYK, CSF1R, C3AR1 | 23/88 | RPS6KA1, PIK3CG | 2/88 | miR-146b, miR-155, miR-181a, miR-181d, miR-193a, miR-19b, miR-21, miR-22, miR-222, miR-34a, miR-9 | 11/18 |
| 52 | TFAP2A, SOX11, YAP1, SFPQ, HIST1H1C, OPCML, FGF12, SOX10, PLCB1, CDK5R1, RAP2A                                                                               | 11/57 |                 | 0/57 | miR-10b, miR-137, miR-139, miR-155, miR-181a, miR-221, miR-222, miR-34a, miR-7                    | 9/21  |
| 53 | THRA, NDRG2, MAP2, ASCL1, CTNND2, DNAJC6, NTRK2, OLIG2, NRXN2, NKX2-2                                                                                        | 10/39 |                 | 0/39 | miR-9                                                                                             | 1/2   |
| 54 | GATA6, TGFBR2, TEK, MME, CITED2, CSF3R, TNFSF10                                                                                                              | 7/35  |                 | 0/35 | miR-155, miR-181a, miR-181d, miR-21, miR-22, miR-222, miR-9                                       | 7/11  |
