# Supplementary material for: A Computational Approach to Identifying Gene-microRNA Modules in Cancer
Source: PubMed Central journal article supplement (PMC4303261; doi:10.1371/journal.pcbi.1004042), 2015-01-22
Supplement: pcbi.1004042.s014.pdf [file pcbi.1004042.s014.pdf]

**Table S7. Experimentally validated gene-miRNA interactions in ovarian cancers.**

| Module ID | Gene    | miRNA    | Validation Method                                                    | Reference |
|-----------|---------|----------|----------------------------------------------------------------------|-----------|
| 2         | MMP9    | miR-21   | qRT-PCR                                                              | 19435867  |
| 2         | KLRB1   | miR-335  | Microarray                                                           | 18185580  |
| 2         | CXCL9   | miR-335  | Microarray                                                           | 18185580  |
| 2         | EPB41L3 | miR-223  | Luciferase reporter assay, Western blot                              | 21628394  |
| 2         | CD96    | miR-335  | Microarray                                                           | 18185580  |
| 2         | CD27    | miR-335  | Microarray                                                           | 18185580  |
| 2         | MEF2C   | miR-223  | Luciferase reporter assay                                            | 18278031  |
| 2         | MEF2C   | miR-223  | Immunofluorescence, qRT-PCR, Western blot                            | 23094093  |
| 2         | MEF2C   | miR-21   | Immunofluorescence, In situ hybridization, Luciferase reporter assay | 21170291  |
| 2         | LSP1    | miR-335  | Microarray                                                           | 18185580  |
| 2         | ITGB2   | miR-146a | Microarray                                                           | 18057241  |
| 2         | ITGB2   | miR-335  | Microarray                                                           | 18185580  |
| 2         | PLAUR   | miR-155  | Proteomics                                                           | 18668040  |
| 2         | LCK     | miR-335  | Microarray                                                           | 18185580  |
| 2         | SPP1    | miR-146a | qRT-PCR                                                              | 20110513  |
| 2         | SPP1    | miR-335  | Microarray                                                           | 18185580  |
| 3         | CCNE2   | miR-25   | CLASH                                                                | 23622248  |
| 3         | GINS1   | miR-18a  | CLASH                                                                | 23622248  |
| 3         | GINS1   | miR-7    | Microarray                                                           | 19073608  |
| 3         | GPR19   | miR-7    | Microarray                                                           | 17612493  |
| 3         | E2F1    | miR-93   | Luciferase reporter assay, Western blot                              | 19486339  |
| 3         | E2F1    | miR-93   | Luciferase reporter assay, Microarray, Western blot                  | 18328430  |
| 3         | E2F1    | miR-93   | Sequencing                                                           | 20371350  |
| 3         | E2F1    | miR-106b | Luciferase reporter assay, qRT-PCR                                   | 18676839  |
| 3         | E2F1    | miR-106b | Luciferase reporter assay, Western blot                              | 19486339  |
| 3         | E2F1    | miR-106b | Luciferase reporter assay, Microarray, Western blot                  | 18328430  |
| 3         | E2F1    | miR-106b | Luciferase reporter assay                                            | 21283765  |
| 3         | E2F1    | miR-106b | Reporter assay                                                       | 18212054  |
| 3         | E2F1    | miR-130b | Sequencing                                                           | 20371350  |
| 3         | KIF22   | miR-25   | CLASH                                                                | 23622248  |
| 3         | ARL6IP1 | miR-130b | Sequencing                                                           | 20371350  |
| 3         | MXD3    | miR-18a  | CLASH                                                                | 23622248  |
| 3         | EZH2    | miR-93   | CLASH                                                                | 23622248  |
| 3         | EZH2    | miR-25   | Luciferase reporter assay, qRT-PCR, Western blot                     | 22399519  |
| 3         | MCM7    | miR-93   | CLASH                                                                | 23622248  |
| 5         | CREBZF  | miR-221  | Reporter assay, Microarray                                           | 20018759  |
| 5         | PEX19   | miR-221  | CLASH                                                                | 23622248  |
| 6         | CHEK1   | miR-15b  | CLASH                                                                | 23622248  |
| 6         | MKI67   | miR-29b  | CLASH                                                                | 23622248  |
| 6         | MKI67   | miR-17   | CLASH                                                                | 23622248  |
| 6         | CDC7    | miR-101  | Sequencing                                                           | 20371350  |
| 6         | CCNE2   | miR-25   | CLASH                                                                | 23622248  |
| 6         | CCNE2   | miR-26a  | Luciferase reporter assay, Western blot                              | 19524505  |
| 6         | LMNB1   | miR-101  | Sequencing                                                           | 20371350  |
| 6         | CDC25A  | miR-18a  | CLASH                                                                | 23622248  |
| 6         | MSH6    | miR-106b | CLASH                                                                | 23622248  |
| 6         | MSH6    | miR-26a  | CLASH                                                                | 23622248  |
| 6         | PCNA    | miR-18a  | CLASH                                                                | 23622248  |
| 6         | KIF23   | miR-25   | CLASH                                                                | 23622248  |
| 6         | KIF23   | miR-106b | Microarray                                                           | 17242205  |
| 7         | FLT4    | miR-331  | CLASH                                                                | 23622248  |
| 9         | PPIE    | miR-324  | CLASH                                                                | 23622248  |
| 10        | NCAPD2  | let-7b   | CLASH                                                                | 23622248  |
| 11        | UBE2I   | let-7b   | Proteomics                                                           | 18668040  |
| 12        | NUP153  | miR-93   | CLASH                                                                | 23622248  |
| 13        | CCNE2   | miR-25   | CLASH                                                                | 23622248  |

|    |        |          |                                         |          |
|----|--------|----------|-----------------------------------------|----------|
| 13 | ACOT7  | miR-18a  | CLASH                                   | 23622248 |
| 13 | RIF1   | miR-93   | CLASH                                   | 23622248 |
| 13 | CDC42  | miR-93   | CLASH                                   | 23622248 |
| 13 | CDC42  | miR-29a  | Luciferase reporter assay, Western blot | 19079265 |
| 13 | MCM7   | miR-93   | CLASH                                   | 23622248 |
| 13 | DDX49  | miR-25   | CLASH                                   | 23622248 |
| 13 | BIRC5  | miR-93   | CLASH                                   | 23622248 |
| 13 | PCNA   | miR-18a  | CLASH                                   | 23622248 |
| 13 | CBX3   | miR-93   | CLASH                                   | 23622248 |
| 13 | PSMB4  | miR-25   | CLASH                                   | 23622248 |
| 14 | CAMTA1 | miR-218  | Sequencing                              | 20371350 |
| 14 | DBN1   | miR-149  | CLASH                                   | 23622248 |
| 14 | CEP170 | miR-125b | CLASH                                   | 23622248 |
| 14 | BCL3   | miR-125b | Luciferase reporter assay               | 20658525 |
| 14 | HK2    | miR-125b | Luciferase reporter assay, qRT-PCR      | 22593586 |
| 15 | NDRG1  | let-7b   | CLASH                                   | 23622248 |
| 15 | TUBB   | let-7b   | CLASH                                   | 23622248 |
| 15 | TUBB   | miR-20a  | CLASH                                   | 23622248 |
| 15 | SP100  | let-7b   | Proteomics                              | 18668040 |
| 17 | DYRK2  | miR-93   | Sequencing                              | 20371350 |
| 17 | DYRK2  | miR-93   | CLASH                                   | 23622248 |
| 17 | MARS   | let-7b   | Proteomics                              | 18668040 |
| 17 | NUP107 | miR-93   | Sequencing                              | 20371350 |
| 17 | RRAGC  | miR-29a  | CLASH                                   | 23622248 |
| 17 | NCAPD2 | let-7b   | CLASH                                   | 23622248 |
| 17 | NCAPD2 | miR-93   | CLASH                                   | 23622248 |
| 18 | CHEK1  | miR-15b  | CLASH                                   | 23622248 |
| 18 | CCNE2  | miR-25   | CLASH                                   | 23622248 |
| 18 | RNGTT  | miR-25   | CLASH                                   | 23622248 |
| 18 | MCM3   | miR-93   | CLASH                                   | 23622248 |
| 18 | NASP   | miR-29a  | Luciferase reporter assay, Western blot | 22080513 |
| 18 | NASP   | miR-29a  | Luciferase reporter assay               | 22194605 |
| 18 | NASP   | miR-93   | CLASH                                   | 23622248 |
| 18 | KIF23  | miR-25   | CLASH                                   | 23622248 |
| 18 | MCM7   | miR-93   | CLASH                                   | 23622248 |
| 19 | VPS39  | let-7b   | pSILAC, Proteomics, Other               | 18668040 |
| 20 | DEPDC1 | miR-17   | CLASH                                   | 23622248 |
| 20 | ASF1B  | miR-18a  | CLASH                                   | 23622248 |
| 20 | MAD2L1 | miR-93   | CLASH                                   | 23622248 |
| 20 | BIRC5  | miR-93   | CLASH                                   | 23622248 |
| 20 | BIRC5  | miR-101  | Sequencing                              | 20371350 |
| 20 | TOP2A  | miR-7    | CLASH                                   | 23622248 |
| 20 | CDC20  | miR-18a  | CLASH                                   | 23622248 |
| 20 | CDC20  | miR-93   | CLASH                                   | 23622248 |
| 21 | CCR1   | miR-21   | Luciferase reporter assay               | 21131358 |
| 23 | FBXO28 | miR-17   | CLASH                                   | 23622248 |
| 23 | SNRPE  | let-7b   | CLASH                                   | 23622248 |
| 23 | ARID4B | miR-17   | CLASH                                   | 23622248 |
| 25 | CHEK1  | miR-15b  | CLASH                                   | 23622248 |
| 25 | CCNE2  | miR-25   | CLASH                                   | 23622248 |
| 25 | PCNA   | miR-18a  | CLASH                                   | 23622248 |
| 25 | MCM7   | miR-93   | CLASH                                   | 23622248 |
| 25 | KPNA2  | miR-93   | CLASH                                   | 23622248 |
| 25 | KIF23  | miR-25   | CLASH                                   | 23622248 |
| 26 | DEPDC1 | miR-17   | CLASH                                   | 23622248 |
| 26 | PLK1   | let-7b   | CLASH                                   | 23622248 |
| 26 | BIRC5  | miR-93   | CLASH                                   | 23622248 |
| 26 | BIRC5  | miR-101  | Sequencing                              | 20371350 |
| 26 | BIRC5  | let-7b   | CLASH                                   | 23622248 |

|    |          |          |                                                                    |          |
|----|----------|----------|--------------------------------------------------------------------|----------|
| 26 | CCNA2    | let-7b   | Immunoblot, Immunofluorescence, Luciferase reporter assay, qRT-PCR | 18379589 |
| 26 | MAD2L1   | miR-93   | CLASH                                                              | 23622248 |
| 26 | FEN1     | let-7b   | CLASH                                                              | 23622248 |
| 26 | PCNA     | miR-18a  | CLASH                                                              | 23622248 |
| 26 | CCNB1    | let-7b   | CLASH                                                              | 23622248 |
| 26 | KPNA2    | miR-93   | CLASH                                                              | 23622248 |
| 26 | KPNA2    | miR-17   | CLASH                                                              | 23622248 |
| 26 | MCM4     | let-7b   | CLASH                                                              | 23622248 |
| 26 | CHEK1    | miR-15b  | CLASH                                                              | 23622248 |
| 26 | HMMR     | miR-93   | CLASH                                                              | 23622248 |
| 26 | RAN      | miR-29a  | flow, qRT-PCR, GFP reporter assay                                  | 19818597 |
| 26 | CDC7     | miR-101  | Sequencing                                                         | 20371350 |
| 27 | TWIST1   | miR-214  | Luciferase reporter assay, qRT-PCR, Western blot                   | 22540680 |
| 27 | MMP14    | miR-145  | Reporter assay, Microarray                                         | 21351259 |
| 29 | PPIE     | miR-324  | CLASH                                                              | 23622248 |
| 29 | MYCBP    | miR-93   | CLASH                                                              | 23622248 |
| 30 | WDR46    | miR-324  | CLASH                                                              | 23622248 |
| 30 | EEF1E1   | let-7b   | Proteomics                                                         | 18668040 |
| 30 | TBCC     | miR-93   | CLASH                                                              | 23622248 |
| 30 | RXRB     | let-7b   | CLASH                                                              | 23622248 |
| 30 | PFDN6    | miR-106b | CLASH                                                              | 23622248 |
| 31 | TRIM22   | miR-146a | Microarray                                                         | 18057241 |
| 31 | TRIM22   | miR-335  | Microarray                                                         | 18185580 |
| 31 | STAT1    | miR-146a | Microarray                                                         | 20110513 |
| 31 | OAS2     | miR-335  | Microarray                                                         | 18185580 |
| 31 | SERPINF1 | miR-335  | Microarray                                                         | 18185580 |
| 31 | STAT3    | miR-155  | Proteomics                                                         | 18668040 |
| 31 | STAT3    | miR-20a  | CLASH                                                              | 23622248 |
| 31 | STAT3    | miR-21   | Western blot, Other                                                | 20048743 |
| 31 | STAT3    | miR-21   | Microarray                                                         | 18591254 |
| 31 | STAT3    | miR-125b | Microarray                                                         | 17891175 |
| 31 | STAT3    | miR-20b  | qRT-PCR, ELISA, ChIP, Western blot                                 | 20232316 |
| 31 | OAS1     | miR-335  | Microarray                                                         | 18185580 |
| 31 | AIM1     | miR-21   | Microarray                                                         | 18591254 |
| 31 | ISG15    | miR-146a | Microarray                                                         | 18057241 |
| 31 | CTSD     | miR-335  | Microarray                                                         | 18185580 |
| 31 | OASL     | miR-146a | Microarray                                                         | 18057241 |
| 31 | SPP1     | miR-146a | qRT-PCR                                                            | 20110513 |
| 31 | SPP1     | miR-335  | Microarray                                                         | 18185580 |
| 31 | PTAFR    | miR-335  | Microarray                                                         | 18185580 |
| 31 | EPB41L3  | miR-223  | Luciferase reporter assay, Western blot                            | 21628394 |
| 31 | TNFSF10  | miR-222  | Western blot                                                       | 18246122 |
| 31 | IRF2     | miR-335  | Microarray                                                         | 18185580 |
| 31 | ACVR2B   | miR-335  | Microarray                                                         | 18185580 |
| 31 | ACVR2B   | miR-140  | Sequencing                                                         | 20371350 |
| 31 | LAPTM5   | miR-335  | Microarray                                                         | 18185580 |
| 31 | C1QA     | miR-335  | Microarray                                                         | 18185580 |
| 31 | ITGB2    | miR-146a | Microarray                                                         | 18057241 |
| 31 | ITGB2    | miR-335  | Microarray                                                         | 18185580 |
| 31 | LYN      | miR-222  | CLASH                                                              | 23622248 |
| 31 | CXCL9    | miR-335  | Microarray                                                         | 18185580 |
| 32 | TOB1     | miR-218  | Luciferase reporter assay                                          | 23060446 |
| 33 | NCAPG    | miR-16   | Proteomics                                                         | 18668040 |
| 33 | MKI67    | miR-29b  | CLASH                                                              | 23622248 |
| 33 | MKI67    | miR-17   | CLASH                                                              | 23622248 |
| 33 | MKI67    | miR-16   | Proteomics                                                         | 18668040 |
| 33 | KIFC1    | let-7b   | CLASH                                                              | 23622248 |
| 33 | DEPDC1   | miR-17   | CLASH                                                              | 23622248 |
| 33 | PLK1     | miR-16   | pSILAC, Proteomics, Other                                          | 18668040 |

|    |         |          |                                                                    |          |
|----|---------|----------|--------------------------------------------------------------------|----------|
| 33 | PLK1    | let-7b   | CLASH                                                              | 23622248 |
| 33 | CEP55   | miR-16   | Sequencing                                                         | 20371350 |
| 33 | KIF14   | miR-16   | Proteomics                                                         | 18668040 |
| 33 | AURKA   | let-7b   | Microarray                                                         | 17699775 |
| 33 | AURKA   | let-7b   | Proteomics                                                         | 18668040 |
| 33 | RACGAP1 | miR-16   | Proteomics                                                         | 18668040 |
| 33 | KIF23   | miR-16   | Proteomics                                                         | 18668040 |
| 33 | KIF23   | miR-25   | CLASH                                                              | 23622248 |
| 33 | KIF23   | miR-106b | Microarray                                                         | 17242205 |
| 33 | OIP5    | miR-16   | Sequencing                                                         | 20371350 |
| 33 | OIP5    | miR-29c  | Sequencing                                                         | 20371350 |
| 33 | UBE2C   | miR-17   | CLASH                                                              | 23622248 |
| 33 | UBE2C   | miR-16   | Proteomics                                                         | 18668040 |
| 33 | CENPF   | miR-93   | CLASH                                                              | 23622248 |
| 33 | CENPF   | miR-16   | Proteomics                                                         | 18668040 |
| 33 | NUSAP1  | let-7b   | CLASH                                                              | 23622248 |
| 33 | TOP2A   | miR-7    | CLASH                                                              | 23622248 |
| 33 | CCNA2   | let-7b   | Immunoblot, Immunofluorescence, Luciferase reporter assay, qRT-PCR | 18379589 |
| 33 | CDC20   | miR-18a  | CLASH                                                              | 23622248 |
| 33 | CDC20   | miR-93   | CLASH                                                              | 23622248 |
| 33 | CDC20   | miR-16   | Proteomics                                                         | 18668040 |
| 33 | AURKB   | miR-16   | Microarray, qRT-PCR                                                | 19738602 |
| 33 | AURKB   | miR-16   | Proteomics                                                         | 18668040 |
| 33 | AURKB   | let-7b   | pSILAC, Proteomics, Other                                          | 18668040 |
| 33 | TACC3   | miR-18a  | CLASH                                                              | 23622248 |
| 33 | RRM2    | miR-26a  | CLASH                                                              | 23622248 |
| 33 | RRM2    | miR-425  | CLASH                                                              | 23622248 |
| 33 | RRM2    | let-7b   | Microarray                                                         | 17699775 |
| 33 | RRM2    | let-7b   | Proteomics                                                         | 18668040 |
| 33 | CKS2    | let-7b   | CLASH                                                              | 23622248 |
| 33 | CCNB2   | let-7b   | CLASH                                                              | 23622248 |
| 33 | CDCA8   | miR-16   | Proteomics                                                         | 18668040 |
| 33 | CDCA8   | let-7b   | Proteomics                                                         | 18668040 |
| 33 | BIRC5   | miR-93   | CLASH                                                              | 23622248 |
| 33 | BIRC5   | miR-101  | Sequencing                                                         | 20371350 |
| 33 | BIRC5   | miR-425  | Sequencing                                                         | 20371350 |
| 33 | BIRC5   | let-7b   | CLASH                                                              | 23622248 |
| 33 | KPNA2   | miR-93   | CLASH                                                              | 23622248 |
| 33 | KPNA2   | miR-17   | CLASH                                                              | 23622248 |
| 33 | KPNA2   | miR-16   | Proteomics                                                         | 18668040 |
