# Supplementary material for: A Computational Approach to Identifying Gene-microRNA Modules in Cancer
Source: PubMed Central journal article supplement (PMC4303261; doi:10.1371/journal.pcbi.1004042), 2015-01-22
Supplement: pcbi.1004042.s015.pdf [file pcbi.1004042.s015.pdf]

**Table S8. Genes and miRNAs are co-regulated by the same TF in ovarian cancer modules.**

| Module ID | TF    | miRNA                                      | Pubmed ID                                    | Genes                                                                                                                                 | p-value  |
|-----------|-------|--------------------------------------------|----------------------------------------------|---------------------------------------------------------------------------------------------------------------------------------------|----------|
| 1         | EGR1  | miR-23b                                    | 20811575                                     | BOP1, EXOSC4, FBXL6, GRINA, HSF1, LRRC14, OPLAH, PTK2, PYCRL, SCRIB, SHARPIN, ZC3H3, ZNF16, ZNF250                                    | 1.10E-05 |
| 1         | MYC   | miR-23b<br>miR-30b<br>miR-30d<br>miR-378   | 19219026<br>18066065<br>18066065<br>21242960 | C8ORF55, CYC1, GRINA, ZC3H3, ZNF250, ZNF696                                                                                           | 1.49E-05 |
| 2         | MITF  | miR-146a                                   | 21603362                                     | ACP5, CD44, CD74, CXCL13, DOCK2, DPYD, EPB41L3, FGR, GZMH, HCK, ITGB2, LCP2, MEF2C, SIGLEC1, SNX10, SPPI1, VAV1                       | 1.69E-02 |
| 2         | MYC   | miR-29b<br>miR-29c                         | 20564213<br>20564213                         | CLEC5A, CXCL11, CXCL9, DPYD, FGR, ITGB2, LCK, LSP1, MMP9, TYROBP, VAV1                                                                | 1.63E-02 |
| 3         | E2F1  | miR-15b<br>miR-18a<br>miR-25<br>miR-7      | 21454377<br>23396440<br>22431589<br>22492316 | CDC6, EZH2, GINS1, GINS2, IQCK, MCM2, MCM7, MXD3, POLA2                                                                               | 2.46E-06 |
| 5         | RUNX1 | miR-221                                    | 23344057                                     | ATP5D, C10RF61, CREBZF, DFFB, MRPL40, PPP1R14B, PTK2, PYCRL, RANBP1, SCRIB                                                            | 1.20E-02 |
| 6         | E2F1  | miR-15b<br>miR-20b<br>miR-25<br>miR-7      | 21454377<br>23396440<br>22431589<br>22492316 | CBX5, CDC25A, CDC7, CHEK1, DONSON, LMNB1, MCM2, MCM6, MSH6, PCNA, POLE2, TIMELESS                                                     | 9.30E-10 |
| 6         | MYCN  | miR-17                                     | 17943719                                     | CDC25A, CDC7, CHEK1, FEN1, KIF4A, KNTC1, TIMELESS                                                                                     | 1.08E-07 |
| 7         | EGR1  | miR-23b                                    | 20811575                                     | BOP1, CPSF1, FBXL6, FLT4, HSF1, PLEC1, PRKCE, PTK2, PYCRL, RECQL4, SCRIB, SHARPIN, ZNF250                                             | 6.76E-05 |
| 8         | EGR1  | miR-152<br>miR-199a<br>miR-199b<br>miR-214 | 20811575<br>21189327<br>20811575<br>21189327 | AQP1, BGN, CALB2, CEND1, COL1A1, COMP, HNT, IRX5, ITGA5, ITGB1, LGALS1, MMP11, PDGFRB, PLAUR, POU2F3, SERPINE1, TGFBII1, THBS1, THBS2 | 2.51E-05 |
| 13        | E2F1  | miR-18a<br>miR-25<br>miR-7                 | 23396443<br>22431589<br>22492316             | ARNTL2, AURKB, BUB3, CDC6, CHEK1, EXO1, FANCG, GINS2, GMNN, MCM6, MCM7, NUP155, PCNA, PEX10, POLE2, RPP30, SMARCB1, TIMELESS, TMPO    | 2.20E-11 |
| 18        | E2F1  | miR-15b<br>miR-18a<br>miR-25               | 21454377<br>23396444<br>22431589             | AURKB, CASP8AP2, CDC7, CHEK1, DEK, DONSON, EXO1, FANCG, MCM2, MCM3, MCM6, MCM7, NASP, TIMELESS, TOPBP1                                | 0.00E+00 |
| 19        | MITF  | let-7b                                     | 21603362                                     | CTSB, ETV6, KIF13B, LMNA, PRKCD, RAD54L2, RHBDF2, TFEB                                                                                | 4.98E-02 |
| 19        | RUNX1 | miR-222                                    | 23344057                                     | C10RF116, CAPN1, CD82, ETV6, KIF13B, LMNA, MAPKAPK2, RAD54L2, SMARCA2                                                                 | 9.77E-03 |
| 20        | E2F1  | miR-15b<br>miR-18a<br>miR-7                | 21454377<br>23396440<br>22492316             | AURKB, CENPA, E2F8, EXO1, EXOSC9, GINS2, HMGB2                                                                                        | 6.86E-04 |
| 20        | MYCN  | miR-17                                     | 17943719                                     | AURKB, CDCA3, CDCA8, FOXM1, KIF4A, MAD2L1, RAD51AP1                                                                                   | 5.93E-07 |
| 22        | EGR1  | miR-152                                    | 20811575                                     | AEBP1, COL1A1, COL5A1, COL5A3, COL6A1, ITGA5, LOXL2, MMP11, MMP2, THBS2                                                               | 2.13E-02 |
| 22        | EGR1  | miR-214                                    | 21189327                                     | AEBP1, COL1A1, COL5A1, COL5A3, COL6A1, ITGA5, LOXL2, MMP11, MMP2, THBS2                                                               | 2.13E-02 |
| 25        | E2F1  | miR-15b<br>miR-18a<br>miR-25<br>miR-7      | 21454377<br>23396446<br>22431589<br>22492316 | CDC7, CHEK1, EXO1, FBXO5, KIAA0101, KPNA2, MCM2, MCM6, MCM7, PCNA, POLE2, TIMELESS, TIPIN                                             | 5.00E-12 |
| 26        | E2F1  | miR-15b<br>miR-18a<br>miR-25<br>miR-7      | 21454377<br>23396447<br>22431589<br>22492316 | CDC7, CENPA, CHEK1, EXOSC9, FBXO5, GINS2, GMNN, H2AFZ, KPNA2, PCNA, RPA3, SLC25A11, TIMELESS                                          | 2.29E-09 |

|    |       |                                                            |                                                                      |                                                                                                                                                                                            |          |
|----|-------|------------------------------------------------------------|----------------------------------------------------------------------|--------------------------------------------------------------------------------------------------------------------------------------------------------------------------------------------|----------|
| 27 | EGR1  | miR-152<br>miR-199a<br>miR-199b<br>miR-214                 | 20811575<br>21189327<br>20811575<br>21189327                         | AEBP1, BGN, C10ORF56, C7ORF10, COL1A1, COL5A1, COMP, FSTL1, HNT, LAMB1, LOXL2, MMP11, MMP2, PDGFRB, TAGLN, TGFB1I1, THBS1, THBS2, TMEM158, TWIST1, XYLT1                                   | 6.88E-04 |
| 27 | NANOG | miR-22                                                     | 18079172                                                             | MMP2, SPARC, SRPX2, THBS1, THBS2, TNFAIP6, TWIST1                                                                                                                                          | 2.23E-02 |
| 28 | MYC   | miR-23a<br>miR-27a                                         | 19219026<br>23649631                                                 | AKAP8, AKAP8L, HMGA1, ILF3, SLC35E1, SMARCA4, TMEM161A                                                                                                                                     | 2.79E-05 |
| 31 | IRF8  | miR-155                                                    | 23166356                                                             | KLF12, OAS1, OAS3, PSMB10, PSMB9, SLC15A3, SP100                                                                                                                                           | 2.00E-07 |
| 31 | MITF  | miR-146a                                                   | 21603362                                                             | BAZ1A, CAPG, CTSB, CTSD, CTSL1, DBI, DPYD, EPB41L3, EYA2, HERC5, IRF9, ITGB2, KLF12, LAPTM5, LCP2, OAS2, PTAFR, RAB25, RAB27A, S100A13, SERPINF1, SIGLEC1, SPP1, STAT1, STAT3, STOM, TACC1 | 2.91E-06 |
| 31 | MYC   | miR-29b<br>miR-29c                                         | 20564213<br>18066065                                                 | CD82, CXCL11, CXCL9, DPYD, ISG15, ITGB2, LAPTM5, MAPK8IP1, OAS2, RAB25, RFXAP, SMARCA2, STAT1, TACC1, TNFSF10,                                                                             | 6.13E-04 |
| 31 | RUNX1 | miR-222<br>miR-221                                         | 23344057<br>23344057                                                 | C10RF116, CAPN1, CD82, PLEKHF2, PLLP, RAB11FIP1, REEP5, S100A4                                                                                                                             | 3.02E-02 |
| 33 | E2F1  | miR-15b<br>miR-16<br>miR-18a<br>miR-20b<br>miR-25<br>miR-7 | 21454377<br>21454377<br>23396448<br>23396440<br>22431589<br>22492316 | AURKB, CENPA, DLG7, EXO1, FBXO5, KPNA2, OIP5, PBK, RRM2                                                                                                                                    | 1.56E-04 |
| 33 | MYCN  | miR-17                                                     | 17943719                                                             | AURKB, CDCA8, DLG7, FOXM1, KIF11, KIF4A, RAD51AP1, TROAP, TTK, UBE2C                                                                                                                       | 1.10E-09 |
