# Supplementary material for: A Computational Approach to Identifying Gene-microRNA Modules in Cancer
Source: PubMed Central journal article supplement (PMC4303261; doi:10.1371/journal.pcbi.1004042), 2015-01-22
Supplement: pcbi.1004042.s016.pdf [file pcbi.1004042.s016.pdf]

**Table S9. MiRNA regulates TFs and the TFs regulate genes in the ovarian cancer modules.**

| Module ID | miRNA                                    | PubMed ID                                    | TF    | Genes                                                                                                                                                                   | p-value  |
|-----------|------------------------------------------|----------------------------------------------|-------|-------------------------------------------------------------------------------------------------------------------------------------------------------------------------|----------|
| 2         | miR-96<br>miR-125b                       | 17597072<br>21368288                         | MITF  | ACP5, CD44, CD74, CXCL13, DOCK2, DPYD, EPB41L3, FGR, GZMH, HCK, ITGB2, LCP2, MEF2C, SIGLEC1, SNX10, SPP1, VAV1                                                          | 1.69E-02 |
| 2         | miR-17<br>miR-20a                        | 18700987<br>18700987                         | RUNX1 | FGR, ICOS, LCK, LCP2, PTPN22, RASSF4, SLA, TFEC                                                                                                                         | 4.32E-04 |
| 3         | miR-25                                   | 20036482                                     | MITF  | COQ7, E2F1, GINS1, IQCK, MCM2, PLK1, SEC61A2, SYT17, TFDP2, TRMT11, TUBG1                                                                                               | 2.67E-02 |
| 3         | miR-106b<br>miR-18a                      | 19559694<br>23322197                         | STAT3 | ARL6IP1, EZH2, IQCK, LRRC20, MCM2, POLA2, TUBG1                                                                                                                         | 4.72E-02 |
| 6         | miR-101<br>miR-29a<br>miR-29b<br>miR-29c | 21654684<br>21654684<br>21654684<br>21654684 | MYCN  | CDC25A, CDC7, CHEK1, FEN1, KIF4A, KNTC1, TIMELESS                                                                                                                       | 1.08E-07 |
| 13        | miR-25                                   | 20811575                                     | EGR1  | ACOT7, AURKAIP1, AURKB, BIRC5, CBX3, CDC45L, CHEK1, DBF4, FANCE, GAD1, GINS2, HEATR3, LSM5, MCM6, MCM7, NADK, NCAPH, ORC5L, RANBP1, RIF1, SNTB1, SUB1, TFAM, TMPO, WDR8 | 3.98E-03 |
| 13        | miR-29a                                  | 21654684                                     | MYCN  | AURKB, CDC6, CDCA8, CHEK1, KIF4A, TIMELESS                                                                                                                              | 2.88E-04 |
| 13        | miR-18a                                  | 19114653                                     | RUNX1 | BIRC5, BUB3, CBX3, CDC42, CDC6, CDCA8, DBF4, DDX49, EIF4EBP1, GAD1, GMNN, MCM7, PCNA, PEX10, RAD1, RANBP1, RIF1, SMARCB1, SUB1, TMPO, UCHL5                             | 6.64E-03 |
| 15        | miR-20a                                  | 19559694                                     | STAT3 | DNAH7, GPATCH2, LAMA2, RHOBTB1, SP100, TAF1A, TSN                                                                                                                       | 4.72E-02 |
| 17        | let-7b                                   | 23738143                                     | E2F1  | C11ORF30, CAND1, KIAA0286, MSH2, SHMT2, TIMELESS, YEATS4                                                                                                                | 5.11E-05 |
| 18        | miR-29a                                  | 21654684                                     | MYCN  | AURKB, CDC7, CHEK1, FEN1, FOXM1, KNTC1, TIMELESS                                                                                                                        | 5.46E-08 |
| 18        | miR-18a                                  | 23322197                                     | STAT3 | CASP8AP2, DSN1, EXO1, MCM2, RACGAP1, RINGTT, WHSC1                                                                                                                      | 2.58E-02 |
| 19        | miR-17                                   | 20811575                                     | EGR1  | ALS2CL, CAPN1, CD82, CTSB, ETV6, IFNAR2, KIF13B, LCN2, LMNA, MAPKAPK2, PRKCD, RHBDF2, TFEB, ZDHHC18                                                                     | 4.07E-05 |
| 19        | miR-17<br>miR-20a                        | 18700987<br>18700987                         | RUNX1 | C1ORF116, CAPN1, CD82, ETV6, KIF13B, LMNA, MAPKAPK2, RAD54L2, SMARCA2                                                                                                   | 9.77E-03 |
| 20        | miR-101<br>miR-29a<br>miR-29b            | 21654684<br>21654684<br>21654684             | MYCN  | AURKB, CDCA3, CDCA8, FOXM1, KIF4A, MAD2L1, RAD51AP1                                                                                                                     | 5.93E-07 |
| 23        | miR-17                                   | 18700987                                     | RUNX1 | CAMSAP1L1, H3F3A, NSL1, NUP133, PARP1, RAB4A, RBBP5, TSNAX                                                                                                              | 4.97E-03 |
| 23        | miR-17                                   | 19559694                                     | STAT3 | CAMSAP1L1, FBXO28, NUP133, RAB4A, TAF1A, TSNAX                                                                                                                          | 7.27E-03 |
| 26        | let-7b                                   | 22698995                                     | BACH1 | BIRC5, CCNA2, CENPA, CHEK1, H2AFZ, MCM10, MCM4, PCNA, RAP1GDS1                                                                                                          | 9.97E-06 |
| 26        | let-7b                                   | 23738143                                     | E2F1  | CDC7, CENPA, CHEK1, EXOSC9, FBXO5, GINS2, GMNN, H2AFZ, KPNA2, PCNA, RPA3, SLC25A11, TIMELESS                                                                            | 2.29E-09 |
| 26        | miR-101<br>miR-29a<br>miR-29b            | 21654684<br>21654684<br>21654684             | MYCN  | CDC7, CHEK1, FEN1, MAD2L1, TIMELESS, XRCC4                                                                                                                              | 1.11E-05 |
| 26        | miR-17<br>miR-18a                        | 18700987<br>19114653                         | RUNX1 | BIRC5, EXOSC9, FAM64A, GMNN, PCNA, RAN, RANBP1, RFC4, RIT1, RPA3, STK17B, UCHL5, XRCC4                                                                                  | 1.34E-02 |
| 30        | miR-25                                   | 20811575                                     | EGR1  | CDC5L, CSNK2B, DAXX, EHMT2, GTF2H4, PBX2, RDBP, RGL2, RXRB, TBCC, ZBTB22                                                                                                | 3.58E-03 |
| 30        | miR-20b<br>miR-25                        | 19056895<br>20036482                         | MITF  | CDC5L, DAXX, EHMT2, LSM2, PAK1IP1, RGL2, SNRPC, TBCC                                                                                                                    | 4.98E-02 |
| 31        | miR-185                                  | 23417242                                     | AR    | CAPG, EYA2, OAS1, RAB25, RAB27A, SAMSN1, SIGLEC1, SMARCA2, SQRDL, STAT1                                                                                                 | 6.90E-03 |

|    |                                          |                                              |       |                                                                                                                                                                                            |          |
|----|------------------------------------------|----------------------------------------------|-------|--------------------------------------------------------------------------------------------------------------------------------------------------------------------------------------------|----------|
| 31 | miR-125b                                 | 21368288                                     | MITF  | BAZ1A, CAPG, CTSB, CTSD, CTSL1, DBI, DPYD, EPB41L3, EYA2, HERC5, IRF9, ITGB2, KLF12, LAPTM5, LCP2, OAS2, PTAFR, RAB25, RAB27A, S100A13, SERPINF1, SIGLEC1, SPP1, STAT1, STAT3, STOM, TACC1 | 2.91E-06 |
| 31 | miR-17<br>miR-20a                        | 18700987<br>18700987                         | RUNX1 | CAPG, CD82, CTSD, CTSL1, DBI, HERC5, IRF1, IRF2, ITGB2, KLF12, LAPTM5, LYN, RFXAP, SLA, SMARCA2, SP100, STAT1, STAT3, STOM, TACC1, TNFSF10, USP18, WASF1                                   | 6.58E-05 |
| 33 | let-7b                                   | 22698995                                     | BACH1 | BIRC5, BUB1, CCNA2, CENPA, CENPF, KIF11, MCM10, OIP5, RRM2, TK1                                                                                                                            | 1.06E-04 |
| 33 | miR-146b<br>let-7b                       | 23762142<br>23762142                         | E2F1  | AURKB, CENPA, DLG7, EXO1, FBXO5, KPNA2, OIP5, PBK, RRM2                                                                                                                                    | 1.56E-04 |
| 33 | miR-101<br>miR-29a<br>miR-29b<br>miR-29c | 21654684<br>21654684<br>21654684<br>21654684 | MYCN  | AURKB, CDCA8, DLG7, FOXM1, KIF11, KIF4A, RAD51AP1, TROAP, TTK, UBE2C                                                                                                                       | 1.10E-09 |
