# Supplementary material for: A Computational Approach to Identifying Gene-microRNA Modules in Cancer
Source: PubMed Central journal article supplement (PMC4303261; doi:10.1371/journal.pcbi.1004042), 2015-01-22
Supplement: pcbi.1004042.s017.pdf [file pcbi.1004042.s017.pdf]

**Table S10. MiRNAs regulate genes in GBM modules.**

| Module ID | microRNA | m    | k  | x  | p-value  | Genes                                                                                       |
|-----------|----------|------|----|----|----------|---------------------------------------------------------------------------------------------|
| 8         | miR-181d | 612  | 73 | 9  | 1.13E-02 | CD14, CD163, CP, FAS, MAP3K8, MMP7, NCF1, STC1, TLR1                                        |
| 8         | miR-181b | 612  | 73 | 8  | 3.13E-02 | CD14, CD163, FAS, MAP3K8, MMP7, NCF1, SAT1, TLR1                                            |
| 14        | miR-181d | 612  | 65 | 8  | 1.67E-02 | ABCC3, ARSJ, CD163, CHRNA9, NRP2, PLAU, SERPINE1, TGFBI                                     |
| 17        | miR-181d | 612  | 59 | 7  | 2.92E-02 | COL6A3, LAMC3, MYH9, PLAU, SERPINE1, STC1, TGFBI                                            |
| 20        | miR-210  | 469  | 74 | 7  | 2.48E-02 | CCKBR, CRHBP, GNG3, HPCA, MYT1L, NEFM, NRG1                                                 |
| 25        | miR-181d | 612  | 75 | 9  | 1.34E-02 | CP, F13A1, FAS, FLII, KLF6, PLAU, SERPINE1, SRGN, TGFBI                                     |
| 33        | miR-338  | 1067 | 83 | 13 | 3.01E-02 | C13orf18, CAST, DDB2, FAS, IGFBP2, LDHA, PLAUR, SLC25A20, SLC2A10, SLC43A3, TAGLN2, TNFAIP6 |
| 34        | miR-22   | 910  | 27 | 5  | 4.89E-02 | MDC1, NOL8, PHF2, SPEN, TRRAP                                                               |
| 36        | miR-223  | 815  | 81 | 10 | 4.60E-02 | BUB3, CDKN1B, CEP72, H3F3A, MBIP, PDCL, PPM1D, PSIP1, RB1CC1, STMN1                         |
| 41        | miR-181d | 612  | 68 | 9  | 7.19E-03 | CD14, CD163, DSE, F13A1, MAP3K8, MBD4, SRGN, STC1, TGFBI                                    |
| 41        | miR-181b | 612  | 68 | 8  | 2.14E-02 | CD14, CD163, MAP3K8, MAPK13, MBD4, SAT1, SRGN, TGFBI                                        |
| 50        | miR-222  | 838  | 49 | 8  | 1.88E-02 | AP3B2, BCHE, DLGAP1, GRIA2, KCNQ2, RAPGEF4, SEZ6L, ZFP2                                     |
| 51        | miR-181d | 612  | 88 | 9  | 3.43E-02 | CASP1, CD14, CD4, DOCK2, PLAC8, RAC2, SRGN, TBXAS1, TLR1                                    |
| 54        | miR-181a | 1430 | 35 | 10 | 6.06E-03 | C1orf78, CITED2, CSF3R, IL7R, LEPR, MME, NPC2, PROCR, TGM2, ZMYM6                           |
