# Supplementary material for: A Computational Approach to Identifying Gene-microRNA Modules in Cancer
Source: PubMed Central journal article supplement (PMC4303261; doi:10.1371/journal.pcbi.1004042), 2015-01-22
Supplement: pcbi.1004042.s018.pdf [file pcbi.1004042.s018.pdf]

**Table S11. Genes and miRNAs are co-regulated by the same TF in GBM modules.**

| Module ID | TF    | miRNA                                                                    | Pubmed ID                                                                        | Genes                                                                                                                                                                                           | p-value  |
|-----------|-------|--------------------------------------------------------------------------|----------------------------------------------------------------------------------|-------------------------------------------------------------------------------------------------------------------------------------------------------------------------------------------------|----------|
| 2         | MYC   | miR-29c<br>miR-30a                                                       | 20564213<br>18066065                                                             | BUB3, CDC7, DDX11, FBXO5, KIF23, LMNB1, MCM7, NCAPG                                                                                                                                             | 1.89E-03 |
| 2         | MYCN  | miR-152                                                                  | 23482921                                                                         | AURKB, CCDC15, CDC6, CDC7, CDCA3, CDCA8, CHEK1, FOXM1, KIF11, KIF4A, KNTC1, MAD2L1, MSH5, RAD51AP1, TROAP, TTK, ZWILCH                                                                          | 0.00E+00 |
| 2         | SOX2  | miR-22<br>miR-29a                                                        | 18079172<br>21693621                                                             | ATAD2, BUB1B, BUB3, CDC45L, CDC7, KIF11, KIF15, KIF2C, KNTC1, ORC6L, TOP2A, TUBG1                                                                                                               | 4.55E-04 |
| 2         | CREB1 | miR-17                                                                   | 21972292                                                                         | BRCA1, BUB3, CCNA2, CDC45L, CENPE, EXO1, GOT1, GTSE1, HMGB2, MCM6, ORC6L, PRC1, RAD51, SFRS2                                                                                                    | 1.13E-06 |
| 2         | E2F1  | miR-15b<br>miR-18a                                                       | 21454377<br>23396440                                                             | AP3B2, ATAD2, AURKB, BCOR, BUB3, CDC6, CDC7, CDT1, CENPM, CHEK1, DDX11, E2F8, EXO1, EZH2, FBXO5, GOT1, HMGB2, KPNA2, LMNB1, MCM2, MCM3, MCM6, MCM7, MSH5, MXD3, POLA2, SNRPA1, STIL             | 0.00E+00 |
| 2         | MYC   | miR-18a<br>miR-92                                                        | 20516112<br>20516112                                                             | BUB3, CDC7, DDX11, FBXO5, KIF23, LMNB1, MCM7, NCAPG                                                                                                                                             | 1.89E-03 |
| 2         | MYCN  | miR-106a<br>miR-18a<br>miR-18b<br>miR-19a<br>miR-20a<br>miR-92<br>miR-93 | 17943719<br>19946337<br>19946337<br>19946337<br>19946337<br>17943719<br>17943719 | AURKB, CCDC15, CDC6, CDC7, CDCA3, CDCA8, CHEK1, FOXM1, KIF11, KIF4A, KNTC1, MAD2L1, MSH5, RAD51AP1, TROAP, TTK, ZWILCH                                                                          | 0.00E+00 |
| 5         | MYCN  | miR-93                                                                   | 17943719                                                                         | AURKB, CDCA3, CHEK1, FOXM1, KIF11, KIF4A, KNTC1, LIG1, RAD51AP1, TIMELESS, TROAP, TTK, ZWILCH                                                                                                   | 0.00E+00 |
| 7         | E2F1  | miR-15b<br>miR-18a                                                       | 21454377<br>23396440                                                             | AURKB, BCL7C, CENPA, CENPM, DTYMK, GINS2, GMNN, ISG20L1, MXD3, OIP5, PCNA, SNRPD1, STIL                                                                                                         | 1.66E-09 |
| 8         | RUNX1 | miR-142<br>miR-221<br>miR-222                                            | 23509362<br>23344057<br>23344057                                                 | CCL2, CD14, CD44, CHI3L2, EMR1, FOSL2, HCK, ICAM1, IL10RA, IL4R, JUNB, LYN, MAP3K8, PLAUR, PLCG2, PTPN6, RNASE2, SLA, SLC11A1, SOD2, SPI1, STAB1, SYK, THBD, TREM1                              | 6.00E-05 |
| 9         | E2F1  | miR-18a                                                                  | 23396441                                                                         | ERBB3, FHOD3, MBP, NRXN2, PAK7, PEG3, PLCB1, PPP1R16B, RAP2A, TMSL8                                                                                                                             | 3.61E-03 |
| 9         | MYC   | miR-18a                                                                  | 20516112                                                                         | DGKB, FHOD3, G3BP2, MBP, SH3GL3, ST8SIA3                                                                                                                                                        | 5.33E-03 |
| 10        | MYC   | miR-29c<br>miR-18a<br>miR-92                                             | 20564213<br>20516112<br>20516112                                                 | AGPS, CDKN3, GMP5, HIST1H2BH, KIF2C, MELK, NUP155, RAB8A, SERBP1, TAF5L, TPX2                                                                                                                   | 2.80E-04 |
| 10        | SOX2  | miR-29a                                                                  | 21693621                                                                         | ATAD2, BUB1B, HIST1H2BH, IK, KIF2C, KNTC1, NCBP1                                                                                                                                                | 2.38E-02 |
| 10        | E2F1  | miR-15b<br>miR-18a                                                       | 21454377<br>23396442                                                             | ATAD2, CDT1, CHEK1, FANCG, GART, GMP5, HNRPF, LMNB1, LYN, MCM2, MCM3, MSH6, NCAPD3, NUP155, PFN1, RAB8A, RFWD3, SERBP1, SFRS1, STIL, TMPO                                                       | 0.00E+00 |
| 10        | MYCN  | miR-18a<br>miR-19a<br>miR-92<br>miR-93                                   | 19946337<br>19946337<br>17943719<br>17943719                                     | CDCA8, CHEK1, DARS2, FEN1, KNTC1, ZWILCH                                                                                                                                                        | 2.00E-04 |
| 11        | RUNX1 | miR-221<br>miR-222<br>miR-199a                                           | 23344057<br>23344057<br>19114653                                                 | ATP5C1, BAX, BEGAIN, CFLAR, DNMBP, EDEM3, EFNB2, F11R, IKBKB, IQSEC1, IRF2, LYL1, MAPK1, PTK2B, RANBP2, RCAN1, SP100, SPRY1, TACC1, TICAM1, TNFRSF10B, TNFRSF12A, TNFRSF1A, TXNDC15, UGP2, WEE1 | 1.61E-06 |
| 16        | MYC   | miR-29c<br>miR-18a<br>miR-92                                             | 20564213<br>20516112<br>20516112                                                 | DDX11, KIF23, LMNB1, NCAPG, NUP155, TTF2, UCK2                                                                                                                                                  | 5.23E-03 |
| 16        | SOX2  | miR-29a                                                                  | 21693621                                                                         | ATAD2, BUB1B, CDC45L, KIF11, KIF15, KIF2C, KNTC1, OIP5, ORC1L, TTF2                                                                                                                             | 3.22E-03 |

|    |       |                                                               |                                                                      |                                                                                                                                                                                                                                                                                                                                                                                                                                    |          |
|----|-------|---------------------------------------------------------------|----------------------------------------------------------------------|------------------------------------------------------------------------------------------------------------------------------------------------------------------------------------------------------------------------------------------------------------------------------------------------------------------------------------------------------------------------------------------------------------------------------------|----------|
| 16 | E2F1  | miR-15b<br>miR-18a                                            | 21454377<br>23396444                                                 | ATAD2, AURKB, BRCA2, CDC25A, CDC6, CDT1, CENPA, CHEK1, DDX11, DLG7, EXO1, LMNB1, LMNB2, NUP155, OIP5, POLA2, POLD1, RFWD3, STIL, TMPO                                                                                                                                                                                                                                                                                              | 6.10E-11 |
| 16 | MYCN  | miR-106a<br>miR-18a<br>miR-19a<br>miR-20a<br>miR-92<br>miR-93 | 17943719<br>19946337<br>19946337<br>19946337<br>17943719<br>17943719 | AURKB, CDC25A, CDC6, CDCA3, CDCA8, CHEK1, DARS2, DLG7, FEN1, KIF11, KNTC1, SLC6A15, TMEM48, TROAP, TTK                                                                                                                                                                                                                                                                                                                             | 0.00E+00 |
| 17 | MYC   | miR-30c                                                       | 18066065                                                             | BMP1, CD248, COL18A1, COL1A1, COL4A2, COL5A1, COL6A1, FBN1, FN1, IL1R1, ITGB1, MMP9, SLC9A1, TRAM2                                                                                                                                                                                                                                                                                                                                 | 6.81E-04 |
| 17 | RUNX1 | miR-199a<br>miR-222                                           | 19114653<br>23344057                                                 | BMP1, COL18A1, COL4A2, COL5A1, COL6A1, COL6A2, COL6A3, IGFBP4, ITGA4, ITGA5, LAMC3, LOXL1, MICAL2, MMP9, MYH9, SERPINE1, SLC9A1, THBD, THBS1, TRAM2                                                                                                                                                                                                                                                                                | 3.68E-04 |
| 21 | AHR   | miR-21<br>miR-22                                              | 23052036<br>23052036                                                 | ADAM12, CTNNA1, DNMBP, FOSL2, NEDD9, TGFBI                                                                                                                                                                                                                                                                                                                                                                                         | 3.67E-03 |
| 21 | AR    | miR-27a                                                       | 22505583                                                             | CALD1, CHSY1, COL5A2, DNMBP, DUSP1, DUSP5, FAS, FEM1C, GALNT2, IQGAP1, ITPKC, LOXL2, MCL1, PARVA, PODXL, RAB8B, SWAP70, TNFRSF10B, TREM1                                                                                                                                                                                                                                                                                           | 1.08E-04 |
| 21 | RUNX1 | miR-142<br>miR-221<br>miR-222<br>miR-27a                      | 23509362<br>23344057<br>23344057<br>19114653                         | ACTN1, BACH1, BCAT1, C5AR1, CALU, CSNK1D, CTNNA1, CTSD, DNAJB1, DNMBP, DUSP1, DUSP5, FOSL2, FZD5, GALNT2, HSPA5, ICAM1, ITGA5, LAMC1, LGALS1, NEDD9, PLAUR, PTPN12, SERPINE1, STK10, SWAP70, TNFRSF10B, TNFRSF12A, TREM1, WWTR1, ZYX                                                                                                                                                                                               | 1.01E-08 |
| 22 | IRF8  | miR-19b                                                       | 23251709                                                             | CTSZ, HERPUD1, HLA-B, HLA-C, NCF4, SLC15A3, SLC2A5, TRIM38                                                                                                                                                                                                                                                                                                                                                                         | 1.20E-05 |
| 22 | RUNX1 | miR-142<br>miR-221<br>miR-222                                 | 23509362<br>23344057<br>23344057                                     | ALOX5, ALOX5AP, ARSA, BMP2K, C1ORF38, C1QB, C1RL, C5AR1, CD14, CD300A, CD81, CD86, CFD, CREM, CTSD, CTSL1, DUSP6, ELF1, FCER1G, FGR, FXRD5, FYB, GJA4, GMFG, GYPC, HCK, IL10RA, IL4R, ITGA5, ITGB2, MAN2B1, MAP3K8, MYO1F, NCF2, NCF4, NOD2, PLAUR, PLCG2, RAD52, RIN3, RNASE2, RPS6KA1, SH3GLB1, SLA, SLC11A1, SLC16A3, SLCO2B1, SOCS3, SOD2, ST14, STAT1, STAT6, SYK, TBXAS1, THBD, TIMP1, TNFRSF10B, TRIM38, VAV1, WIPF1, YWHAH | 1.60E-11 |
| 24 | RUNX1 | miR-142<br>miR-221<br>miR-222                                 | 23509362<br>23344057<br>23344057                                     | AGPS, BACH1, CSF2RB, DDX3X, GM2A, HCK, HEXA, LCPI1, NCF2, NFKB1, P2RX4, PICALM, SLCO2B1, TGFBR2, TMOD3, WIPF1                                                                                                                                                                                                                                                                                                                      | 5.24E-05 |
| 25 | AR    | miR-27a                                                       | 22505583                                                             | F13A1, FLII, FTH1, HCLS1, IL13RA1, KLF6, PRRX1, PTX3, SOCS3, TGOLN2, ZFP36L1, ZFP36L2                                                                                                                                                                                                                                                                                                                                              | 2.32E-03 |
| 25 | RUNX1 | miR-142<br>miR-221<br>miR-222<br>miR-27a                      | 23509362<br>23344057<br>23344057<br>19114653                         | ACTN1, BCL6, C1RL, C5AR1, CD44, CLIC4, CTSD, CTSL1, FOSL2, FTH1, GALNT2, ICAM1, ITGA5, JUNB, KLF6, LTF, MAN2B1, PLAUR, RCAN1, SERPINE1, SLA, SLC16A3, SOCS3, SOD2, SQSTM1, STAT3, TGOLN2, THBS1, TREM1, VEGFA, ZFP36L2                                                                                                                                                                                                             | 7.15E-08 |
| 26 | SOX2  | miR-22                                                        | 18079172                                                             | ABLIM1, ALDH5A1, BMPR2, C1ORF61, CEACAM1, CLASP2, CLDN4, CRMP1, CSNK1E, DAPK1, DBN1, DLGAP1, F11R, FRY, HDAC4, HIPK2, KIAA0888, LPHN1, NEK1, PIK3R1, QKI, RAB3D, RAP2A, RAPGEF4, RTN3, SATB1, SPINT1, TERF2, TNIK                                                                                                                                                                                                                  | 3.21E-08 |
| 27 | SOX2  | miR-29a                                                       | 21693621                                                             | BUB1B, CDC2, KIF11, KIF2C, NUSAP1, OIP5, TOP2A, UBE2C                                                                                                                                                                                                                                                                                                                                                                              | 9.97E-04 |
| 27 | E2F1  | miR-15b                                                       | 21454377                                                             | AURKB, CDC2, CENPA, DLG7, GINS2, KIAA0101, MCM2, MLF1IP, OIP5, PBK                                                                                                                                                                                                                                                                                                                                                                 | 1.37E-05 |
| 27 | MYCN  | miR-93                                                        | 17943719                                                             | AURKB, CDCA3, CDCA8, DLG7, DTL, FOXM1, KIF11, KIF4A, MAD2L1, MLF1IP, RAD51AP1, TROAP, TTK, UBE2C                                                                                                                                                                                                                                                                                                                                   | 0.00E+00 |

|    |       |                                                     |                                                          |                                                                                                                                                                                                                                                                                              |          |
|----|-------|-----------------------------------------------------|----------------------------------------------------------|----------------------------------------------------------------------------------------------------------------------------------------------------------------------------------------------------------------------------------------------------------------------------------------------|----------|
| 28 | RUNX1 | miR-142                                             | 23509362                                                 | C5AR1, CAPG, CECR1, CTSA, FXYD5, GM2A, GNAI2, HCK, HEXB, IL10RA, ITGB2, MGAT1, MYO1F, PLAUR, PLD3, RAP2B, RNASE2, SH2B3, SYK, TGFB1, TLN1                                                                                                                                                    | 2.67E-05 |
| 29 | SOX2  | miR-29a                                             | 21693621                                                 | BUB1B, CDC45L, CDC7, DCC1, KIF15, KIF2C, OIP5, ORC6L, TCF3                                                                                                                                                                                                                                   | 1.44E-06 |
| 29 | E2F1  | miR-15b                                             | 21454377                                                 | AURKB, CDC7, CENPA, DLG7, EZH2, MCM2, MLF1IP, OIP5, PCNA, POLE2, RNASEH2A                                                                                                                                                                                                                    | 2.90E-09 |
| 29 | MYCN  | miR-93                                              | 17943719                                                 | AURKB, CDC7, DLG7, MLF1IP, RAD51AP1, TTK                                                                                                                                                                                                                                                     | 1.07E-06 |
| 30 | IRF8  | miR-19b                                             | 23251709                                                 | ADORA3, CD37, CD74, CTSZ, HLA-DRA, NCF4, SLC2A5                                                                                                                                                                                                                                              | 2.11E-05 |
| 30 | RUNX1 | miR-142<br>miR-222                                  | 23509362<br>23344057                                     | ALOX5, ALOX5AP, C1ORF38, C1QB, C3, C5AR1, CAPG, CD300A, CD86, CFD, CTS1L, FCER1G, FTL, FXYD5, FYB, GM2A, GMFG, GPR65, GYPC, HCK, IL10RA, ITGB2, LAPTM5, LCP1, LYN, MFNG, MYO1F, NCF2, NCF4, NINJ1, PLCG2, PTPN6, RNASE2, RNASE6, SLA, SLC11A1, SLCO2B1, SPI1, STAB1, SYK, TBXAS1, UCP2, VAV1 | 5.18E-07 |
| 33 | AR    | miR-27a                                             | 22505583                                                 | ABCC3, CCDC109B, CLDN10, DRAM, FAS, IGFBP2, IQ-GAP1, LDHA, MSN, OSBPL3, PDGFA, PGCP, PLA2G5, RGN, SLC27A3, STEAP3, SWAP70, TNFAIP6, TNFRSF1A, VAV3                                                                                                                                           | 1.70E-03 |
| 33 | RUNX1 | miR-142<br>miR-221<br>miR-222<br>miR-27a            | 23509362<br>23344057<br>23344057<br>19114653             | ANXA5, CSRP1, CTNNA1, DAG1, EMP3, GSTK1, HEXB, LGALS3, MSN, NUAQ2, NUCB1, OSBPL3, PGCP, PLAUR, RCAN1, SLC43A3, SWAP70, TAGLN2, TIMP1, TNFRSF12A, TNFRSF1A, VAV3, VIM                                                                                                                         | 2.65E-03 |
| 35 | RUNX1 | miR-221<br>miR-222                                  | 23344057<br>23344057                                     | CALU, CAPNS1, COL4A2, GNB2, HSPA5, ITGA5, LAMC1, PLAUR, SNAP91, SPRY1, SPRY4, VEGFA, ZYX                                                                                                                                                                                                     | 1.34E-02 |
| 37 | SOX2  | miR-29a                                             | 21693621                                                 | CCDC46, IGFBP3, IL1RAP, KHDRBS2, LAMC1, P4HB, PDIA4, PLOD2, SPRY1, SPRY4                                                                                                                                                                                                                     | 1.36E-02 |
| 37 | E2F1  | miR-15b<br>miR-18a<br>miR-18a                       | 21454377<br>23396445<br>23396446                         | ATAD2, AURKB, CDC6, CENPA, CHEK1, E2F8, EZH2, MXD3, OIP5, STIL, TMPO                                                                                                                                                                                                                         | 6.68E-07 |
| 37 | MYCN  | miR-106a<br>miR-18a<br>miR-19a<br>miR-20a<br>miR-93 | 17943719<br>19946337<br>19946337<br>19946337<br>17943719 | AURKB, CDC6, CDCA3, CDCA8, CHEK1, KIF11, KIF4A, MAD2L1, RAD51AP1, TTK                                                                                                                                                                                                                        | 1.82E-10 |
| 40 | SOX2  | miR-29a                                             | 21693621                                                 | BUB1B, BUB3, CBX5, CDC7, FANCC, FZD2, HDAC2, ILF3, KIF11, KIF15, KIF2C, KNTC1, MUS81, SFPQ, TOP2A, TUBG1                                                                                                                                                                                     | 1.54E-07 |
| 40 | MYCN  | miR-93                                              | 17943719                                                 | CDC7, CDCA8, CHEK1, DTL, FEN1, KIF11, KIF4A, KNTC1, MSH5, NUP93, POLD3, TIMELESS, TTK                                                                                                                                                                                                        | 1.90E-11 |
| 41 | AHR   | miR-21                                              | 23052036                                                 | DAB2, FOSL2, IL1R2, IL6, MFSD1, TGFB1                                                                                                                                                                                                                                                        | 3.17E-03 |
| 41 | RUNX1 | miR-142<br>miR-221<br>miR-222                       | 23509362<br>23344057<br>23344057                         | ALOX5, C1ORF38, C5AR1, CD14, CDCP1, CTS1L, FOSL2, IL10RA, IL4R, JUNB, MAP3K8, NOD2, PLAUR, RIN3, SLA, SLC11A1, SLC16A3, SOD2, STAB1, THBD, TIMP1, TNFAIP3, TREM1                                                                                                                             | 1.44E-04 |
| 43 | SOX2  | miR-29a                                             | 21693621                                                 | BUB1B, HN1, KIF2C, OIP5, TOP2A, UBE2C                                                                                                                                                                                                                                                        | 1.84E-02 |
| 43 | E2F1  | miR-15b<br>miR-18a                                  | 21454377<br>23396447                                     | AURKB, CENPA, DTYMK, EZH2, FBXO5, GINS1, GINS2, H2AFZ, KPNA2, MCM2, MLF1IP, OIP5, PBK, PCNA, RNASEH2A, STIL                                                                                                                                                                                  | 3.20E-11 |
| 43 | MYC   | miR-18a                                             | 20516112                                                 | CDKN3, FBXO5, H2AFZ, KIF2C, MELK, MLF1IP                                                                                                                                                                                                                                                     | 2.78E-02 |
| 43 | MYCN  | miR-18a<br>miR-93                                   | 19946337<br>17943719                                     | AURKB, DTL, KIF4A, MAD2L1, MLF1IP, RAD51AP1, TTK, UBE2C, ZWILCH                                                                                                                                                                                                                              | 1.18E-08 |
| 45 | SOX2  | miR-22                                              | 18079172                                                 | AATF, ANAPC1, ATG4B, CLASP1, CPSF6, CTBP2, DCP1A, EIF5B, ERCC5, FBXW11, NXF1, PDLIM5, POLR3E, SFRS2IP, SPAG9, STAG1, TNPO3, U2AF1, ZC-CHC14, ZNF532, ZNF638                                                                                                                                  | 7.00E-04 |

|    |       |                                |                                  |                                                                                                                                                                                                                                                                                                                                                                                                                              |          |
|----|-------|--------------------------------|----------------------------------|------------------------------------------------------------------------------------------------------------------------------------------------------------------------------------------------------------------------------------------------------------------------------------------------------------------------------------------------------------------------------------------------------------------------------|----------|
| 46 | SOX2  | miR-22<br>miR-29a              | 18079172<br>21693621             | SMARCC1, ATAD2B, ZNF426, NASP, GOLGA1, SPAST, PRPF4B, PHF16, ZFP37, DIS3, FAM48A, RBM12, CASP8AP2, RBM4, PDCL, DHX35, RBM4B, RFWD3, ZER1, ZBED4, CEP110, MSL2L1, WDR68, HMG20A, ILF3, TLK2, PTK2, SRPK1, ORC2L, STX5, SMG1, NUP155, ANP32A, SUZ12, NCL, EXOSC2, C11orf30, USP39, SETDB1, TTF1, DEDD, GSPT1, CPSF6, WBP11, REV1, BCOR, PCBP2, DDX18, RAD1, SAFB, CSTF1, UBTF, RIF1, STRN3, MDC1, NFYC, TSC2, FUS, NFRKB, RRN3 | 7.00E-04 |
| 47 | SOX2  | miR-29a                        | 21693621                         | AATF, ABL1, ATF7IP, CHD4, CPSF6, DCP1A, GOLGA1, KPNA6, POLR3E, SRRM2, TNPO3                                                                                                                                                                                                                                                                                                                                                  | 4.00E-02 |
| 48 | RUNX1 | miR-142<br>miR-222             | 23509362<br>23344057             | ANXA1, CASP8, CSTA, EFEMP1, FTL, RHOG, RNASE6, S100A10, S100A11                                                                                                                                                                                                                                                                                                                                                              | 2.32E-04 |
| 50 | SOX2  | miR-22                         | 18079172                         | APBA2, ASCL1, FCHSD2, GDAP1L1, MAPT, MYST2, TRIM37                                                                                                                                                                                                                                                                                                                                                                           | 1.24E-02 |
| 51 | RUNX1 | miR-142<br>miR-222             | 23509362<br>23344057             | ALOX5, C1QB, CAPG, CD14, CD300A, CD69, CD86, CEBPA, CSF2RB, DLGAP2, FCER1G, FYB, GMFG, HCK, IL10RA, ITGB2, LAPTM5, LYN, MYO1F, NCF2, NCF4, PLAC8, RAC2, RNASE2, RNASE3, RNASE6, RPS6KA1, SLA, SYK, TBXAS1                                                                                                                                                                                                                    | 9.98E-06 |
| 54 | RUNX1 | miR-142<br>miR-199a<br>miR-222 | 23509362<br>19114653<br>23344057 | CITED2, ERG, HEXB, IMPA2, LEPR, RBPMS, SLIT3, TGFB2, TGM2, TNFSF10, TSPAN4, ZMYM6                                                                                                                                                                                                                                                                                                                                            | 3.63E-03 |
