# Supplementary material for: A Computational Approach to Identifying Gene-microRNA Modules in Cancer
Source: PubMed Central journal article supplement (PMC4303261; doi:10.1371/journal.pcbi.1004042), 2015-01-22
Supplement: pcbi.1004042.s019.pdf [file pcbi.1004042.s019.pdf]

**Table S12. MiRNA regulates TFs and the TFs regulate genes in GBM modules.**

| Module ID | miRNA                                   | PubMed ID                                    | TF    | Genes                                                                                                                                                                                  | p-value  |
|-----------|-----------------------------------------|----------------------------------------------|-------|----------------------------------------------------------------------------------------------------------------------------------------------------------------------------------------|----------|
| 1         | miR-17                                  | 18700987                                     | RUNX1 | ACTR1A, ATP5C1, BUB3, CORO1C, DCLRE1C, IDI1, KRAS, PITRM1, PPP1CC, RSU1, TMPO                                                                                                          | 8.55E-03 |
| 1         | miR-17<br>miR-19a<br>miR-19b            | 23056458<br>23056458<br>23056458             | SPI1  | ACTR1A, ARHGAP12, CORO1C, DCLRE1C, DDX21, KRAS, PITRM1, PPP1CC, TFAM, TMPO                                                                                                             | 8.77E-04 |
| 2         | miR-223<br>miR-34a                      | 20029046<br>21367750                         | E2F1  | AP3B2, ATAD2, AURKB, BCOR, BUB3, CDC, , CDC7, CDT1, CENPM, CHEK1, DDX11, E2F8, EXO1, EZH2, FBXO5, GOT1, HMGB2, KPNA2, LMNB1, MCM2, MCM3, MCM, , MCM7, MSH5, MXD3, POLA2, SNRPA1, STIL  | 0.00E+00 |
| 2         | miR-29a<br>miR-34a                      | 21654684<br>21654684                         | MYCN  | AURKB, CCDC15, CDC6, CDC7, CDCA3, CDCA8, CHEK1, FOXM1, KIF11, KIF4A, KNTC1, MAD2L1, MSH5, RAD51AP1, TROAP, TTK, ZWILCH                                                                 | 0.00E+00 |
| 2         | miR-34a                                 | 22020437                                     | SOX2  | ATAD2, BUB1B, BUB3, CDC45L, CDC7, KIF11, KIF15, KIF2C, KNTC1, ORC6L, TOP2A, TUBG1                                                                                                      | 4.55E-04 |
| 2         | miR-17                                  | 18700987                                     | RUNX1 | ATAD2, BCOR, BIRC5, BUB1B, BUB3, CCDC15, CDC6, CDCA8, CDT1, CELSR3, CENPF, DDX11, EZH2, FANCI, FOXM1, KIF11, MCM7, RAD51AP1, SNRPA1, STIL, TOP2A, TUBG1, WDHD1                         | 2.46E-02 |
| 2         | miR-17<br>miR-19a<br>miR-19b<br>miR-20a | 23056458<br>23056458<br>23056458<br>23056458 | SPI1  | BUB1B, CDT1, CENPF, CEP55, CHEK1, E2F8, FANCI, GOT1, KNTC1, KPNA2, MAD2L1, MCM3, MCM7, MKI67, NCAPH, PLK1, POLQ, TACC3, ZNF248, ZWILCH                                                 | 1.15E-03 |
| 5         | miR-29a                                 | 21654684                                     | MYCN  | AURKB, CDCA3, CHEK1, FOXM1, KIF11, KIF4A, KNTC1, LIG1, RAD51AP1, TIMELESS, TROAP, TTK, ZWILCH                                                                                          | 0.00E+00 |
| 7         | miR-17                                  | 18700987                                     | RUNX1 | BCL7C, BIRC5, BUB1B, CECR5, DBF4, FAM64A, GMNN, H2AFX, KCNQ2, LSM4, MOBKL3, OIP5, ORC4L, PCNA, PPP1CC, RAD51AP1, SFRS3, STIL                                                           | 3.09E-05 |
| 8         | miR-17<br>miR-9                         | 18700987<br>19114653                         | RUNX1 | CCL2, CD14, CD44, CHI3L2, EMR1, FOSL2, HCK, ICAM1, IL10RA, IL4R, JUNB, LYN, MAP3K8, PLAUR, PLCG2, PTPN6, RNASE2, SLA, SLC11A1, SOD2, SPI1, STAB1, SYK, THBD, TREM1                     | 6.00E-05 |
| 8         | miR-21                                  | 22931209                                     | SOX2  | ADFP, CCL20, CD14, CD44, CTSB, FAS, G0S2, HP, IL1R2, LYN, MAP3K8, MMP7, PBEF1, PLAUR, SERPINA1, SLC39A14, TNFRSF1B                                                                     | 3.91E-05 |
| 9         | miR-223<br>miR-34a                      | 20029046<br>21367750                         | E2F1  | ERBB3, FHOD3, MBP, NRXN2, PAK7, PEG3, PLCB1, PPP1R16B, RAP2A, TMSL8                                                                                                                    | 3.61E-03 |
| 9         | miR-34a                                 | 22020437                                     | SOX2  | ALG6, BASP1, CA10, DGKB, DNM3, DUSP26, ELMO1, ERBB3, FGF12, FHOD3, G3BP2, GNAI1, HMP19, MBP, NCAM1, OPCML, PAK3, PAK7, PEG3, PGRMC1, PLCB1, SH3GL3, SOX11, STMN2, TMEM16C, TMSL8, VAX2 | 6.41E-10 |
| 9         | miR-155                                 | 21460854                                     | TCF4  | BASP1, CIORF106, CA10, DGKB, DUSP26, DYNC111, ELMO1, FGF12, FHOD3, GNAI1, HSPB3, KIF21B, MAG, OLIG2, PLCB1, PPP1R16B, RBPJ, SATB1, SH3BP4, SNAP91, SOX11, STMN2, TSPYL4                | 2.37E-06 |
| 9         | miR-128a                                | 22541023                                     | RUNX1 | OLIG2, PEG3, PPP1R16B, SCN3A, SNAP91, SOX4, STMN2                                                                                                                                      | 5.66E-03 |
| 10        | miR-29a                                 | 21654684                                     | MYCN  | CDCA8, CHEK1, DARS2, FEN1, KNTC1, ZWILCH                                                                                                                                               | 2.00E-04 |
| 10        | miR-18a                                 | 23249750                                     | SMAD3 | AGPS, ATAD2, CPSF6, HEATR1, NFKB1, PFN1, SMC2, SUPT16H, TAF5L, ZWILCH                                                                                                                  | 1.06E-02 |
| 10        | miR-17<br>miR-19a<br>miR-19b<br>miR-20a | 23056458<br>23056458<br>23056458<br>23056458 | SPI1  | AGPS, BUB1B, CDT1, CEP55, CHEK1, CSTF2, CUL4B, EIF4A1, FANCG, FEN1, KNTC1, LYN, MAPK14, MCM3, MKI67, NFKB1, NUP155, PLK1, POLQ, PRPF4, RAB8A, TMPO, UPF2, ZWILCH                       | 5.63E-08 |
| 11        | miR-155                                 | 21460854                                     | TCF4  | ACOX2, AR, ARSJ, CBLC, FEM1C, FGF14, FGFR4, IQSEC1, IRF2, KCNJ2, LIMS1, MCC, MREG, PDGFD, PDLIM4, RPS6KA3, SNX1, SP100, SPRY1, TACC1, TIAM1, ZBTB38, ZEF1                              | 4.90E-07 |

|    |                                         |                                              |       |                                                                                                                                                                                                                                                                                                                                                                                                                                    |          |
|----|-----------------------------------------|----------------------------------------------|-------|------------------------------------------------------------------------------------------------------------------------------------------------------------------------------------------------------------------------------------------------------------------------------------------------------------------------------------------------------------------------------------------------------------------------------------|----------|
| 12 | miR-128a                                | 22541023                                     | RUNX1 | CD34, CHFR, COL18A1, COL4A2, COL5A1, COL6A3, DOCK6, GJA4, IGFBP4, ITGA5, LAMC1, LAMC3, MYH9, NID1, NOTCH3, PDLIM1, TBXA2R                                                                                                                                                                                                                                                                                                          | 4.20E-04 |
| 13 | miR-17<br>miR-19a<br>miR-19b            | 23056458<br>23056458<br>23056458             | SPI1  | CD320, CDKN2AIP, CDYL, DHX9, EIF6, EXOSC9, FANCI, GNAI3, LSM2, LSM4, MED14, NCAPH, NUP153, RAD1, RFC5, RFXANK, RP2, SP3, SPCS3, USP39                                                                                                                                                                                                                                                                                              | 4.29E-04 |
| 14 | miR-21                                  | 22931209                                     | SOX2  | ABCC3, AIM1, ARSJ, CA12, CAV1, CCL20, CSNK1D, CTSB, DPP4, FNDC3B, GBE1, GRN, HSPA5, IQGAP1, ITGA5, NRP2, PDIA3, PLAU, PLAUR, RNASE4, SERPINE1, TGFB11I, THBS1, WWTR1                                                                                                                                                                                                                                                               | 4.80E-11 |
| 14 | miR-155                                 | 21460854                                     | TCF4  | ANG, ANXA2, ARSJ, CCL20, CD163, GBE1, IL1RAP, IL4R, MMP19, NRP2, PTPN12, SRPR, WWTR1                                                                                                                                                                                                                                                                                                                                               | 3.49E-02 |
| 16 | miR-29a                                 | 21654684                                     | MYCN  | AURKB, CDC25A, CDC6, CDCA3, CDCA8, CHEK1, DARS2, DLG7, FEN1, KIF11, KNTC1, SLC6A15, TMEM48, TROAP, TTK                                                                                                                                                                                                                                                                                                                             | 0.00E+00 |
| 16 | miR-18a                                 | 23249750                                     | SMAD3 | ATAD2, C12ORF48, CCNB2, CDC45L, CDC6, FUBP1, GPR126, OIP5, SLC6A15, SMC2                                                                                                                                                                                                                                                                                                                                                           | 4.53E-02 |
| 16 | miR-17<br>miR-19a<br>miR-19b<br>miR-20a | 23056458<br>23056458<br>23056458<br>23056458 | SPI1  | BRCA2, BUB1B, CDT1, CEP55, CHEK1, CHEK2, CSTF2, FANCI, FEN1, FUBP1, KIAA0922, KNTC1, LMNB2, MKI67, NCAPH, NUP155, P2RX5, PLK1, POLD1, POLQ, TMEM48, TMPO                                                                                                                                                                                                                                                                           | 6.12E-05 |
| 17 | miR-128a<br>miR-30c<br>miR-9            | 22541023<br>19114653<br>19114653             | RUNX1 | BMP1, COL18A1, COL4A2, COL5A1, COL6A1, COL6A2, COL6A3, IGFBP4, ITGA4, ITGA5, LAMC3, LOXL1, MICAL2, MMP9, MYH9, SERPINE1, SLC9A1, THBD, THBS1, TRAM2                                                                                                                                                                                                                                                                                | 3.68E-04 |
| 17 | miR-21                                  | 22931209                                     | SOX2  | AIM1, BGN, CALD1, COL4A2, COL6A1, FN1, ITGA5, LOXL2, MICAL2, MYO1B, PLAU, PRSS23, SERPINE1, SPON2, TAGLN, THBS1, TPM2, TRAM2                                                                                                                                                                                                                                                                                                       | 3.47E-07 |
| 18 | miR-155                                 | 21460854                                     | TCF4  | ADCY2, ARHGEF4, CTBP2, CTNND2, EPHB1, KIF21B, LRRC1, MPP2, SATB1                                                                                                                                                                                                                                                                                                                                                                   | 1.35E-02 |
| 20 | miR-128a                                | 22541023                                     | RUNX1 | A2BPI, AAK1, ARPP-21, CABP1, CNKSR2, DLGAP2, EPB49, GAD2, PPP1R16B, SLC17A7, SNAP25, SNAP91                                                                                                                                                                                                                                                                                                                                        | 2.28E-06 |
| 21 | miR-128a<br>miR-9                       | 22541023<br>19114653                         | RUNX1 | ACTN1, BACH1, BCAT1, C5AR1, CALU, CSNK1D, CTNNA1, CTSD, DNAJB1, DNMBP, DUSP1, DUSP5, FOSL2, FZD5, GALNT2, HSPA5, ICAM1, ITGA5, LAMC1, LGALS1, NEDD9, PLAUR, PTPN12, SERPINE1, STK10, SWAP70, TNFRSF10B, TNFRSF12A, TREM1, WWTR1, ZYX                                                                                                                                                                                               | 1.01E-08 |
| 21 | miR-21                                  | 22931209                                     | SOX2  | CA12, CALD1, CSNK1D, CTSD, DUSP5, FAS, GBE1, GRN, HSPA5, IQGAP1, ITGA5, LGALS1, LOXL2, NEDD9, NMI, PLAU, PLAUR, PODXL, SDCBP, SERPINE1, TNFRSF10B, TNFRSF12A, WWTR1                                                                                                                                                                                                                                                                | 1.73E-09 |
| 21 | miR-155                                 | 21460854                                     | TCF4  | BCAT1, CALU, CXCR4, DUSP1, DUSP5, FEM1C, GBE1, IL1RAP, LIMS1, NEDD9, PODXL, PTPN12, SRPR, STK10, SWAP70, WWTR1                                                                                                                                                                                                                                                                                                                     | 5.86E-03 |
| 22 | miR-17<br>miR-9                         | 18700987<br>19114653                         | RUNX1 | ALOX5, ALOX5AP, ARSA, BMP2K, C1ORF38, C1QB, C1RL, C5AR1, CD14, CD300A, CD81, CD86, CFD, CREM, CTSD, CTSL1, DUSP6, ELF1, FCER1G, FGR, FXYD5, FYB, GJA4, GMFG, GYPC, HCK, IL10RA, IL4R, ITGA5, ITGB2, MAN2B1, MAP3K8, MYO1F, NCF2, NCF4, NOD2, PLAUR, PLCG2, RAD52, RIN3, RNASE2, RPS6KA1, SH3GLB1, SLA, SLC11A1, SLC16A3, SLCO2B1, SOCS3, SOD2, ST14, STAT1, STAT6, SYK, TBXAS1, THBD, TIMP1, TNFRSF10B, TRIM38, VAV1, WIPF1, YWHAH | 1.60E-11 |
| 22 | miR-34a                                 | 21654684                                     | MYCN  | FXDY5, NCF2, RIN3, SIGLEC9, SLAMF8, SLCO2B1                                                                                                                                                                                                                                                                                                                                                                                        | 1.37E-03 |
| 22 | miR-21                                  | 22931209                                     | SOX2  | BMP2K, BRD8, CD53, CLIC5, COL15A1, CPM, CTSZ, DOCK2, F13A1, GYPC, HCLS1, HLA-G, MERTK, MFSD1, MSR1, NAGA, PLCG2, RAB20, RAD52, RIN3, SIPA1, SLA, SLCO2B1, SYK, TBXAS1, TRADD                                                                                                                                                                                                                                                       | 2.21E-02 |
| 22 | miR-155                                 | 21460854                                     | TCF4  | FGR, MERTK, MGAT4A, PRKCD, PSCDBP, SH3GLB1, SLAMF8                                                                                                                                                                                                                                                                                                                                                                                 | 1.05E-02 |

|    |                             |                                  |       |                                                                                                                                                                                                                                                                                                              |          |
|----|-----------------------------|----------------------------------|-------|--------------------------------------------------------------------------------------------------------------------------------------------------------------------------------------------------------------------------------------------------------------------------------------------------------------|----------|
| 24 | miR-9                       | 19114653                         | RUNX1 | AGPS, BACH1, CSF2RB, DDX3X, GM2A, HCK, HEXA, LCP1, NCF2, NFKB1, P2RX4, PICALM, SLCO2B1, TGFB2, TMOD3, WIPF1                                                                                                                                                                                                  | 5.24E-05 |
| 24 | miR-21                      | 22931209                         | SOX2  | ADAM10, CTSS, EML4, GRN, HLA-DQB1, LCP1, LPXN, TMOD3                                                                                                                                                                                                                                                         | 6.93E-03 |
| 25 | miR-128a<br>miR-17<br>miR-9 | 22541023<br>18700987<br>19114653 | RUNX1 | ACTN1, BCL6, C1RL, C5AR1, CD44, CLIC4, CTSD, CTSL1, FOSL2, FTH1, GALNT2, ICAM1, ITGA5, JUNB, KLF6, LTF, MAN2B1, PLAUR, RCAN1, SERPINE1, SLA, SLC16A3, SOCS3, SOD2, SQSTM1, STAT3, TGOLN2, THBS1, TREM1, VEGFA, ZFP36L2                                                                                       | 7.15E-08 |
| 25 | miR-21                      | 22931209                         | SOX2  | BCL6, CALD1, CD44, CLIC4, CTSB, CTSD, F13A1, FAS, HP, IQGAP1, ITGA5, PBEF1, PLAUR, PLAUR, SERPINE1, SLC7A7, SQSTM1, STAT3, TGFB2, TGOLN2, THBS1, TNFRSF1B, ZFP36L2                                                                                                                                           | 7.81E-09 |
| 26 | miR-155<br>miR-21           | 21460854<br>22931209             | TCF4  | ABLIM1, APC, BMPR2, CHD9, COL13A1, CTNND2, DAPK1, DLGAP1, EDNRB, EIF4G3, FCHSD2, GRIA2, GRIA3, HDAC4, HERC1, HIPK2, INPP5A, KIF1B, KIF3A, KIF3C, LRP1B, MAP2, NEK1, NLGN1, NOTCH1, NRXN1, NTRK3, OLIG2, PPP1R12B, PPP1R9A, RABGAP1, RAPGEF2, RAPGEF4, SATB1, SCAPER, SCG3, SHC2, SPTBN1, TAOK3, TNIK, TSPYL4 | 6.70E-11 |
| 26 | miR-128a<br>miR-9           | 22541023<br>19114653             | RUNX1 | ALDOC, APBA2, ARHGEF10L, BCAN, BMPR2, C1ORF61, CHD9, CLASP2, CRMP1, CTNND2, DAPK1, DHTKD1, DLGAP1, EHD3, F11R, FAIM2, FCHSD2, FRY, GOLM1, HDAC4, HERC1, HIPK2, ICAM1, INPP5A, KIF1B, MADD, MCF2L, MXI1, MYST2, NLGN1, NOTCH1, PIK3R1, PPP1R9A, PTPN22, RAB3D, RABGAP1, SPOP, SPTBN1, TAOK3, TCF12, TNIK      | 2.75E-07 |
| 27 | miR-29a                     | 21654684                         | MYCN  | AURKB, CDCA3, CDCA8, DLG7, DTL, FOXM1, KIF11, KIF4A, MAD2L1, MLF1IP, RAD51AP1, TROAP, TTK, UBE2C                                                                                                                                                                                                             | 0.00E+00 |
| 27 | miR-17                      | 18700987                         | RUNX1 | BIRC5, BUB1B, CDCA8, CENPF, FAM64A, FANCI, FOXM1, KIF11, MLF1IP, OIP5, PTTG1, RAD51AP1, TOP2A, UBE2S                                                                                                                                                                                                         | 2.78E-02 |
| 28 | miR-21                      | 22931209                         | SOX2  | CTSZ, CXCR4, F13A1, FBP1, GM2A, MGAT1, MSR1, NAGA, SH2B3, SIGLEC7, SIPA1, SYK, TRADD                                                                                                                                                                                                                         | 3.14E-03 |
| 29 | miR-29a                     | 21654684                         | MYCN  | AURKB, CDC7, DLG7, MLF1IP, RAD51AP1, TTK                                                                                                                                                                                                                                                                     | 1.07E-06 |
| 29 | miR-17                      | 18700987                         | RUNX1 | BIRC5, BUB1B, EZH2, FANCI, MLF1IP, NEIL3, OIP5, PCNA, RAD51AP1, SFRS3, TCF3                                                                                                                                                                                                                                  | 3.77E-03 |
| 30 | miR-9                       | 19114653                         | RUNX1 | ALOX5, ALOX5AP, C1ORF38, C1QB, C3, C5AR1, CAPG, CD300A, CD86, CFD, CTSL1, FCER1G, FTL, FXYD5, FYB, GM2A, GMFG, GPR65, GYPC, HCK, IL10RA, ITGB2, LAPTM5, LCP1, LYN, MFNG, MYO1F, NCF2, NCF4, NINJ1, PLCG2, PTPN6, RNASE2, RNASE6, SLA, SLC11A1, SLCO2B1, SPI1, STAB1, SYK, TBXAS1, UCP2, VAV1                 | 5.18E-07 |
| 30 | miR-21                      | 22931209                         | SOX2  | ALOX5, ARHGDIB, CAPG, CPVL, CTSB, CTSS, CTSZ, DAB2, F13A1, FLJ20273, FUCA1, GRN, HLA-DQB1, LAPTM5, LCP1, LYN, LYZ, MFNG, PYCARD, SERPINA1, SERPINF1, SLC7A7, TNFRSF1B, UCP2                                                                                                                                  | 7.10E-05 |
| 30 | miR-155                     | 21460854                         | TCF4  | ADORA3, C1QB, C2, CD163, CD86, CPVL, CSF1R, FYB, GIMAP4, GYPC, HCLS1, HLA-DMB, HLA-DRA, LCP1, LYZ, PLCG2, PTAFR, PTPN6, SYK, TBXAS1, TLR5, VAV1                                                                                                                                                              | 4.59E-02 |
| 31 | miR-21                      | 22931209                         | SOX2  | ASL, CAPG, CASP4, CPVL, LYN, PROCR, RRAS, SERPINA1                                                                                                                                                                                                                                                           | 6.93E-03 |
| 32 | miR-29a                     | 22506032                         | SMAD4 | EIF4G3, GPATCH8, HNRNPA2B1, LUC7L2, NIPBL, TOP1, TRRAP, YLPM1, ZCCHC14, ZCCHC6                                                                                                                                                                                                                               | 3.93E-02 |
| 32 | miR-19a                     | 23056458                         | SPI1  | DNMT1, EIF3A, EIF4G3, KPNB1, MED1, MSH3, NFIC, NIPBL, NUP153, OXSR1, RANBP2, RFC1, SART3, SMARCA4, SON, SPEN, TNPO3, TRRAP, ZCCHC6                                                                                                                                                                           | 3.66E-05 |

|    |                                         |                                              |       |                                                                                                                                                                                |          |
|----|-----------------------------------------|----------------------------------------------|-------|--------------------------------------------------------------------------------------------------------------------------------------------------------------------------------|----------|
| 33 | miR-128a<br>miR-17<br>miR-9             | 22541023<br>18700987<br>19114653             | RUNX1 | ANXA5, CSRP1, CTNNA1, DAG1, EMP3, GSTK1, HEXB, LGALS3, MSN, NUA2, NUCB1, OSBPL3, PGCP, PLAUR, RCAN1, SLC43A3, SWAP70, TAGLN2, TIMP1, TNFRSF12A, TNFRSF1A, VAV3, VIM            | 2.65E-03 |
| 33 | miR-204                                 | 23516376                                     | SOX11 | ANXA2, C13ORF18, CLIC1, CTNNA1, GNG12, PLAUR, SLC43A3, SORT1                                                                                                                   | 7.62E-03 |
| 33 | miR-21                                  | 22931209                                     | SOX2  | ABCC3, ANXA5, BCAP31, CA12, CBR1, EMP3, FAS, G0S2, GNG12, IGFBP2, IQGAP1, PARP12, PDGFA, PDLIM4, PLAUR, PTRF, PYGL, RBP1, SLC43A3, TAGLN2, TMBIM1, TNFRSF12A, TRIP6, UPP1, VIM | 3.79E-10 |
| 34 | miR-19a<br>miR-19b                      | 23056458<br>23056458                         | SPI1  | DNMT1, EP400, MDC1, NIPBL, RFC1, SART3, SPEN, TRRAP                                                                                                                            | 3.33E-03 |
| 35 | miR-21                                  | 22931209                                     | SOX2  | CCDC46, IGFBP3, IL1RAP, KHDRBS2, LAMC1, P4HB, PDIA4, PLOD2, SPRY1, SPRY4                                                                                                       | 1.36E-02 |
| 35 | miR-155                                 | 21460854                                     | TCF4  | CALU, COL4A2, FEM1C, GNB2, GPI, IL1RAP, NDN, PDIA4, SNAP91, SPRY1, SPRY4                                                                                                       | 1.04E-02 |
| 36 | miR-17<br>miR-9                         | 18700987<br>19114653                         | RUNX1 | BUB3, C14ORF104, C5ORF30, CDKN1B, COQ7, CP110, EED, ELF2, GMNN, H3F3A, ING1, NOC4L, PSIP1, RAB4A, RALGAP1, RPS6KA5, SH3GLB2, SIRT1, SSNA1, STMN1, YWHAQ                        | 1.04E-02 |
| 36 | miR-17<br>miR-19a<br>miR-19b<br>miR-20a | 23056458<br>23056458<br>23056458<br>23056458 | SPI1  | AGTPBP1, AIP, C1D, C5ORF30, EED, ING1, MATR3, PRR3, PSIP1, RP2, RPS3, SPAST, TFAM, VPS72, ZBTB5                                                                                | 1.12E-02 |
| 37 | miR-29a                                 | 21654684                                     | MYCN  | AURKB, CDC6, CDCA3, CDCA8, CHEK1, KIF11, KIF4A, MAD2L1, RAD51AP1, TTK                                                                                                          | 1.82E-10 |
| 37 | miR-17                                  | 18700987                                     | RUNX1 | ATAD2, BIRC5, BUB1B, CDC6, CDCA8, CENPF, EZH2, FANCI, KIF11, NEIL3, OIP5, RAD51AP1, RIF1, STIL, TMPO, TRIP13, WDHD1                                                            | 5.57E-04 |
| 37 | miR-17<br>miR-19a<br>miR-19b<br>miR-20a | 23056458<br>23056458<br>23056458<br>23056458 | SPI1  | BUB1B, CENPF, CHEK1, E2F8, FANCI, MAD2L1, NCAPH, RFC5, TMPO                                                                                                                    | 4.05E-02 |
| 38 | miR-9                                   | 19114653                                     | RUNX1 | ANK2, APBA2, BCAN, CLASP2, CRMP1, CTNND2, DDAH1, NCAN, NDRG4, NES, S100B, TNIK, TTYH1, WASF3                                                                                   | 2.38E-02 |
| 39 | miR-155<br>miR-21                       | 21460854<br>21956205                         | TCF4  | ADCY2, CTNND2, DPP6, GRIA2, HIPK2, KIF3A, NEK1, NRXN1, NTRK3, PID1, SCAPER, SCG3, SCN2A, SORBS1, TAOK3                                                                         | 4.34E-05 |
| 40 | miR-29a                                 | 21654684                                     | MYCN  | CDC7, CDCA8, CHEK1, DTL, FEN1, KIF11, KIF4A, KNTC1, MSH5, NUP93, POLD3, TIMELESS, TTK                                                                                          | 1.90E-11 |
| 40 | miR-29a                                 | 22506032                                     | SMAD4 | BRCA1, BUB3, CDC7, CENPF, DTL, EXO1, EZH2, FANCC, KIF5B, LOC81691, MYB, NUP93                                                                                                  | 2.32E-02 |
| 41 | miR-128a<br>miR-17<br>miR-9             | 22541023<br>18700987<br>19114653             | RUNX1 | ALOX5, C10RF38, C5AR1, CD14, CDCP1, CTSL1, FOSL2, IL10RA, IL4R, JUNB, MAP3K8, NOD2, PLAUR, RIN3, SLA, SLC11A1, SLC16A3, SOD2, STAB1, THBD, TIMP1, TNFAIP3, TREM1               | 1.44E-04 |
| 41 | miR-21                                  | 22931209                                     | SOX2  | ADFP, AIM1, ALOX5, CCL20, CD14, CTSB, DAB2, F13A1, HP, IL1R2, MAP3K8, PLAUR, RIN3, SLC39A14, TNFRSF1B                                                                          | 2.08E-04 |
| 43 | miR-29a                                 | 21654684                                     | MYCN  | AURKB, DTL, KIF4A, MAD2L1, MLF1IP, RAD51AP1, TTK, UBE2C, ZWILCH                                                                                                                | 1.18E-08 |
| 43 | miR-17                                  | 18700987                                     | RUNX1 | BIRC5, BUB1B, C9ORF46, CENPF, CKS2, DBF4, EZH2, FANCI, MLF1IP, OIP5, PCNA, PTTG1, RAD51AP1, RFC4, STIL, TOP2A                                                                  | 6.28E-03 |
| 43 | miR-17<br>miR-19b                       | 23056458<br>23056458                         | SPI1  | BUB1B, CCNB1, CENPF, CKS1B, CKS2, DTL, FANCI, KPNA2, LSM2, MAD2L1, RFC4, ZWILCH                                                                                                | 5.16E-03 |
| 46 | miR-17<br>miR-19a<br>miR-19b            | 23056458<br>23056458<br>23056458             | SPI1  | CASP8AP2, DDX18, DHX35, GOLGA1, MDC1, NFYC, NUP155, PCBP2, PRPF4B, RAD1, SETDB1, SPAST, STX5, USP39                                                                            | 1.62E-03 |

|    |                   |                      |       |                                                                                                                                                                                                           |          |
|----|-------------------|----------------------|-------|-----------------------------------------------------------------------------------------------------------------------------------------------------------------------------------------------------------|----------|
| 48 | miR-21            | 22931209             | SOX2  | ANXA1, BMP2K, DPYD, EFEMP1, FAS, GM2A, HLA-E, HNMT, LAMP2, NAGA, NPC2, PAK7, PGCP, S100A10, SERPINB1                                                                                                      | 3.89E-03 |
| 48 | miR-155           | 21460854             | TCF4  | ANG, ANXA4, CASP8, CD86, DPYD, ECM2, EFEMP1, FYB, HNMT, HOMER3, PROCR, SP100, TLR5                                                                                                                        | 4.82E-02 |
| 50 | miR-223           | 20029046             | E2F1  | APBA2, ASCL1, FCHSD2, GDAP1L1, MAPT, MYST2, TRIM37                                                                                                                                                        | 1.24E-02 |
| 50 | miR-155<br>miR-21 | 21460854<br>21956205 | TCF4  | ANKRD46, ARHGEF7, BMP7, DGKB, DLGAP1, DPP6, FCHSD2, GRIA2, IL1R1, MAP2, OLIG2, RAPGEF4, REV3L, SCG3, SEZ6L, SOX11, TRIM37, TSPAN12, ZFP2                                                                  | 7.06E-07 |
| 50 | miR-9             | 19114653             | RUNX1 | ANKRD46, APBA2, BCAN, CLASP2, CRMP1, DLGAP1, DPF1, FCHSD2, GTF2I, IPO9, KCNQ2, MYST2, NCAN, PAFAH1B3, PLA2G6, RBM4B, REV3L, TOP2B, TRIM24                                                                 | 4.78E-05 |
| 50 | miR-17<br>miR-20a | 23056458<br>23056458 | SPI1  | APBA2, DLGAP1, DPP6, IPO9, RBM4B, SCG3                                                                                                                                                                    | 1.55E-02 |
| 51 | miR-9             | 19114653             | RUNX1 | ALOX5, C1QB, CAPG, CD14, CD300A, CD69, CD86, CEBPA, CSF2RB, DLGAP2, FCER1G, FYB, GMFG, HCK, IL10RA, ITGB2, LAPTM5, LYN, MYO1F, NCF2, NCF4, PLAC8, RAC2, RNASE2, RNASE3, RNASE6, RPS6KA1, SLA, SYK, TBXAS1 | 9.98E-06 |
| 51 | miR-21            | 22931209             | SOX2  | ALOX5, CAPG, CD14, CTSS, LAPTM5, LPXN, LYN, LYZ, PLAC8, PYCARD, SERPINA1, SLC7A7                                                                                                                          | 3.85E-02 |
| 52 | miR-34a           | 22020437             | SOX2  | AMPH, B4GALNT1, CA10, CLASP2, DCX, DNMT3, DUSP26, ELAVL4, FGF12, HMP19, MAGI1, MBP, MYT1, NCAM1, NOL4, OPCML, PAK3, PAK7, PGRMC1, PLCB1, SOX11, SPTBN2, STMN2, TMEM16C                                    | 6.75E-10 |
| 52 | miR-155           | 21460854             | TCF4  | AMPH, CA10, DUSP26, DYNC1H1, FGF12, MAGI1, NM-NAT2, NOL4, PLCB1, SFPQ, SNAP91, SOX11, STMN2, TF                                                                                                           | 4.91E-03 |
| 54 | miR-9             | 19114653             | RUNX1 | CITED2, ERG, HEXB, IMPA2, LEPR, RBPMS, SLIT3, TGFBR2, TGM2, TNFSF10, TSPAN4, ZMYM6                                                                                                                        | 3.63E-03 |
| 54 | miR-21            | 22931209             | SOX2  | CASP4, CST7, FBP1, GATA6, LEPR, MALL, MME, PPIC, PROCR, SOSTDC1, TGM2, TNFSF10                                                                                                                            | 5.66E-06 |
| 54 | miR-155           | 21460854             | TCF4  | ERG, IL7R, LEPR, PROCR, RBPMS, SLC25A24, SLIT3, TGFBR2                                                                                                                                                    | 3.79E-02 |
