# Supplementary material for: A Computational Approach to Identifying Gene-microRNA Modules in Cancer
Source: PubMed Central journal article supplement (PMC4303261; doi:10.1371/journal.pcbi.1004042), 2015-01-22
Supplement: pcbi.1004042.s020.pdf [file pcbi.1004042.s020.pdf]

**Table S13. Experimentally validated gene-miRNA interactions in GBM.**

| Module ID | Gene     | miRNA    | Validation Method                                | Reference |
|-----------|----------|----------|--------------------------------------------------|-----------|
| 1         | ZMYND11  | miR-222  | CLASH                                            | 23622248  |
| 1         | ARHGAP12 | miR-19b  | Sequencing                                       | 20371350  |
| 1         | ARHGAP12 | miR-130b | Sequencing                                       | 20371350  |
| 1         | DDX21    | miR-222  | CLASH                                            | 23622248  |
| 2         | NCAPG    | miR-34a  | Proteomics                                       | 21566225  |
| 2         | NCAPG    | miR-16   | Proteomics                                       | 18668040  |
| 2         | STIL     | miR-20a  | CLASH                                            | 23622248  |
| 2         | MKI67    | miR-29b  | CLASH                                            | 23622248  |
| 2         | MKI67    | miR-34a  | Proteomics                                       | 21566225  |
| 2         | MKI67    | miR-16   | Proteomics                                       | 18668040  |
| 2         | CENPF    | miR-93   | CLASH                                            | 23622248  |
| 2         | CENPF    | miR-16   | Proteomics                                       | 18668040  |
| 2         | KIF2C    | miR-20a  | CLASH                                            | 23622248  |
| 2         | KIF2C    | miR-34a  | Proteomics                                       | 21566225  |
| 2         | KIF2C    | miR-16   | Proteomics                                       | 18668040  |
| 2         | ASF1B    | miR-130b | CLASH                                            | 23622248  |
| 2         | ASF1B    | miR-18a  | CLASH                                            | 23622248  |
| 2         | KIF11    | miR-34a  | Proteomics                                       | 21566225  |
| 2         | RACGAP1  | miR-16   | Proteomics                                       | 18668040  |
| 2         | MCM10    | miR-34a  | CLASH                                            | 23622248  |
| 2         | KIF23    | miR-106b | Microarray                                       | 17242205  |
| 2         | KIF23    | miR-25   | CLASH                                            | 23622248  |
| 2         | KIF23    | miR-16   | Proteomics                                       | 18668040  |
| 2         | CENPM    | miR-106b | CLASH                                            | 23622248  |
| 2         | KIF4A    | miR-34a  | Proteomics                                       | 21566225  |
| 2         | KIF4A    | miR-222  | CLASH                                            | 23622248  |
| 2         | MXD3     | miR-18a  | CLASH                                            | 23622248  |
| 2         | CDT1     | miR-20a  | CLASH                                            | 23622248  |
| 2         | CDC48    | miR-16   | Proteomics                                       | 18668040  |
| 2         | KIF14    | miR-16   | Proteomics                                       | 18668040  |
| 2         | E2F8     | miR-19b  | Sequencing                                       | 20371350  |
| 2         | TRAIIP   | miR-34a  | Proteomics                                       | 21566225  |
| 2         | BUB1B    | miR-22   | CLASH                                            | 23622248  |
| 2         | KPNA2    | miR-93   | CLASH                                            | 23622248  |
| 2         | KPNA2    | miR-106a | CLASH                                            | 23622248  |
| 2         | KPNA2    | miR-16   | Proteomics                                       | 18668040  |
| 2         | PLK1     | miR-16   | pSILAC, Proteomics, Other                        | 18668040  |
| 2         | TACC3    | miR-18a  | CLASH                                            | 23622248  |
| 2         | CHEK1    | miR-15b  | CLASH                                            | 23622248  |
| 2         | AURKB    | miR-16   | Microarray, qRT-PCR                              | 19738602  |
| 2         | AURKB    | miR-16   | Proteomics                                       | 18668040  |
| 2         | EZH2     | miR-93   | CLASH                                            | 23622248  |
| 2         | EZH2     | miR-25   | Luciferase reporter assay, qRT-PCR, Western blot | 22399519  |
| 2         | BRCA1    | miR-16   | Luciferase reporter assay                        | 19144710  |
| 2         | MCM2     | miR-34a  | Proteomics                                       | 21566225  |
| 2         | MCM4     | miR-34a  | Proteomics                                       | 21566225  |
| 2         | ATAD2    | miR-106b | Microarray                                       | 17242205  |
| 2         | CDC25C   | miR-34a  | Microarray                                       | 19461653  |
| 2         | MCM3     | miR-93   | CLASH                                            | 23622248  |
| 2         | MCM3     | miR-34a  | Proteomics                                       | 21566225  |
| 2         | MCM3     | miR-222  | CLASH                                            | 23622248  |
| 2         | CEP55    | miR-16   | Sequencing                                       | 20371350  |
| 2         | MCM7     | miR-93   | CLASH                                            | 23622248  |
| 2         | MCM7     | miR-34a  | Proteomics                                       | 21566225  |
| 2         | MCM7     | miR-222  | CLASH                                            | 23622248  |
| 2         | CDC20    | miR-93   | CLASH                                            | 23622248  |

|   |          |          |                                                                                                |          |
|---|----------|----------|------------------------------------------------------------------------------------------------|----------|
| 2 | CDC20    | miR-18a  | CLASH                                                                                          | 23622248 |
| 2 | CDC20    | miR-34a  | Proteomics                                                                                     | 21566225 |
| 2 | CDC20    | miR-34a  | CLASH                                                                                          | 23622248 |
| 2 | CDC20    | miR-16   | Proteomics                                                                                     | 18668040 |
| 2 | SNRPA1   | miR-34a  | CLASH                                                                                          | 23622248 |
| 2 | SNRPA1   | miR-16   | Proteomics                                                                                     | 18668040 |
| 2 | MAD2L1   | miR-93   | CLASH                                                                                          | 23622248 |
| 2 | BIRC5    | miR-93   | CLASH                                                                                          | 23622248 |
| 2 | MCM6     | miR-34a  | Proteomics                                                                                     | 21566225 |
| 4 | STAT1    | miR-34a  | Proteomics                                                                                     | 21566225 |
| 5 | NASP     | miR-93   | CLASH                                                                                          | 23622248 |
| 5 | NASP     | miR-29a  | Luciferase reporter assay, Western blot                                                        | 22080513 |
| 5 | NASP     | miR-29a  | Luciferase reporter assay                                                                      | 22194605 |
| 5 | MCM7     | miR-93   | CLASH                                                                                          | 23622248 |
| 5 | TRIM28   | miR-93   | CLASH                                                                                          | 23622248 |
| 5 | CENPF    | miR-93   | CLASH                                                                                          | 23622248 |
| 5 | TMPO     | miR-106b | CLASH                                                                                          | 23622248 |
| 5 | MCM3     | miR-93   | CLASH                                                                                          | 23622248 |
| 5 | EZH2     | miR-93   | CLASH                                                                                          | 23622248 |
| 5 | KIF23    | miR-106b | Microarray                                                                                     | 17242205 |
| 7 | CENPM    | miR-106b | CLASH                                                                                          | 23622248 |
| 7 | MXD3     | miR-18a  | CLASH                                                                                          | 23622248 |
| 7 | CD320    | miR-18a  | CLASH                                                                                          | 23622248 |
| 7 | BIRC5    | miR-93   | CLASH                                                                                          | 23622248 |
| 7 | MAD2L1   | miR-93   | CLASH                                                                                          | 23622248 |
| 7 | CCNB1    | miR-20a  | CLASH                                                                                          | 23622248 |
| 7 | PCNA     | miR-18a  | CLASH                                                                                          | 23622248 |
| 7 | PPP1CC   | miR-15b  | CLASH                                                                                          | 23622248 |
| 7 | STIL     | miR-20a  | CLASH                                                                                          | 23622248 |
| 8 | PTX3     | miR-21   | Luciferase reporter assay                                                                      | 21131358 |
| 8 | SOD2     | miR-222  | Flow, Luciferase reporter assay, Microarray, qRT-PCR, Western blot                             | 19487542 |
| 8 | CCL20    | miR-21   | ELISA, Immunofluorescence, Luciferase reporter assay                                           | 22001440 |
| 8 | BIRC3    | miR-34a  | Microarray, Northern blot                                                                      | 17540599 |
| 8 | SLC39A14 | miR-9    | Microarray                                                                                     | 17612493 |
| 8 | SLC39A14 | miR-155  | Proteomics                                                                                     | 18668040 |
| 8 | CPD      | miR-155  | Proteomics                                                                                     | 18668040 |
| 8 | CPD      | miR-19b  | Sequencing                                                                                     | 20371350 |
| 8 | ICAM1    | miR-21   | Luciferase reporter assay, Microarray, qRT-PCR                                                 | 21131358 |
| 8 | ICAM1    | miR-222  | Luciferase reporter assay                                                                      | 19949084 |
| 8 | ICAM1    | miR-155  | Luciferase reporter assay                                                                      | 19949084 |
| 8 | ICAM1    | miR-155  | qRT-PCR                                                                                        | 21310411 |
| 8 | ICAM1    | miR-221  | Luciferase reporter assay, Western blot                                                        | 20110463 |
| 8 | ICAM1    | miR-221  | Luciferase reporter assay                                                                      | 19949084 |
| 8 | IL1B     | miR-21   | Luciferase reporter assay, Microarray, qRT-PCR                                                 | 21131358 |
| 8 | PLAUR    | miR-155  | Proteomics                                                                                     | 18668040 |
| 8 | CEBPB    | miR-155  | Luciferase reporter assay                                                                      | 18367535 |
| 8 | CEBPB    | miR-155  | Microarray, qRT-PCR, Western blot                                                              | 19193853 |
| 8 | CEBPB    | miR-155  | Luciferase reporter assay, qRT-PCR, Western blot                                               | 20427544 |
| 8 | CEBPB    | miR-155  | pSILAC, Proteomics                                                                             | 18668040 |
| 8 | CEBPB    | miR-155  | Luciferase reporter assay                                                                      | 19596814 |
| 8 | CEBPB    | miR-155  | ELISA, Immunoblot, Immunocytochemistry, Immunofluorescence, Luciferase reporter assay, qRT-PCR | 19887047 |
| 8 | CEBPB    | miR-34a  | Luciferase reporter assay, Reporter assay                                                      | 20598588 |
| 8 | JUNB     | miR-155  | Proteomics                                                                                     | 18668040 |
| 8 | SPI1     | miR-9    | Microarray                                                                                     | 17612493 |
| 8 | SPI1     | miR-155  | Luciferase reporter assay                                                                      | 19386588 |
| 8 | SPI1     | miR-155  | Reporter assay                                                                                 | 20680360 |
| 8 | SPI1     | miR-155  | Proteomics                                                                                     | 18668040 |
| 8 | SPI1     | miR-34a  | Luciferase reporter assay, Reporter assay                                                      | 20598588 |

|    |         |          |                                                                    |          |
|----|---------|----------|--------------------------------------------------------------------|----------|
| 8  | CCR1    | miR-21   | Luciferase reporter assay                                          | 21131358 |
| 8  | CCL2    | miR-155  | Proteomics                                                         | 18668040 |
| 8  | FAS     | miR-21   | Microarray                                                         | 20048743 |
| 8  | LYN     | miR-222  | CLASH                                                              | 23622248 |
| 8  | CD44    | miR-34a  | Immunohistochemistry, qRT-PCR, Western blot, Reporter assay, Other | 21240262 |
| 8  | IL13RA1 | miR-155  | Luciferase reporter assay                                          | 21097505 |
| 9  | INA     | miR-155  | Proteomics                                                         | 18668040 |
| 9  | SOX4    | miR-138  | Luciferase reporter assay                                          | 23389731 |
| 9  | SOX4    | miR-204  | Luciferase reporter assay, qRT-PCR, Western blot                   | 23204229 |
| 9  | SOX4    | miR-340  | Sequencing                                                         | 20371350 |
| 9  | RAP2A   | miR-34a  | CLASH                                                              | 23622248 |
| 9  | SH3BP4  | miR-155  | pSILAC, Proteomics, Other                                          | 18668040 |
| 9  | SH3BP4  | miR-7    | Microarray                                                         | 19073608 |
| 9  | SH3BP4  | miR-93   | CLASH                                                              | 23622248 |
| 9  | ERBB3   | miR-22   | Luciferase reporter assay, qRT-PCR, Western blot                   | 22484852 |
| 9  | RBPJ    | miR-155  | Proteomics                                                         | 18668040 |
| 9  | RBPJ    | miR-18a  | CLASH                                                              | 23622248 |
| 9  | AMOTL2  | miR-27a  | Sequencing                                                         | 20371350 |
| 9  | G3BP2   | miR-34a  | Proteomics                                                         | 21566225 |
| 9  | MAP3K4  | miR-93   | CLASH                                                              | 23622248 |
| 10 | MKI67   | miR-29b  | CLASH                                                              | 23622248 |
| 10 | GART    | miR-18a  | CLASH                                                              | 23622248 |
| 10 | NONO    | miR-93   | CLASH                                                              | 23622248 |
| 10 | CHEK1   | miR-15b  | CLASH                                                              | 23622248 |
| 10 | HEATR1  | miR-106a | CLASH                                                              | 23622248 |
| 10 | SERBP1  | miR-15b  | CLASH                                                              | 23622248 |
| 10 | SERBP1  | miR-93   | CLASH                                                              | 23622248 |
| 10 | SERBP1  | miR-18a  | CLASH                                                              | 23622248 |
| 10 | CDT1    | miR-20a  | CLASH                                                              | 23622248 |
| 10 | TMPO    | miR-106b | CLASH                                                              | 23622248 |
| 10 | BUB1B   | miR-22   | CLASH                                                              | 23622248 |
| 10 | NUDT21  | miR-20a  | CLASH                                                              | 23622248 |
| 10 | MSH6    | miR-106b | CLASH                                                              | 23622248 |
| 10 | MCM3    | miR-93   | CLASH                                                              | 23622248 |
| 10 | SRPK1   | miR-93   | Sequencing                                                         | 20371350 |
| 10 | EIF4A1  | miR-15b  | Luciferase reporter assay                                          | 16609010 |
| 10 | EIF4A1  | miR-93   | CLASH                                                              | 23622248 |
| 10 | STIL    | miR-20a  | CLASH                                                              | 23622248 |
| 10 | ATAD2   | miR-106b | Microarray                                                         | 17242205 |
| 10 | GMPS    | miR-18a  | CLASH                                                              | 23622248 |
| 10 | KIF2C   | miR-20a  | CLASH                                                              | 23622248 |
| 10 | SUPT16H | miR-18a  | CLASH                                                              | 23622248 |
| 10 | SUPT16H | miR-25   | CLASH                                                              | 23622248 |
| 11 | WEE1    | miR-221  | Sequencing                                                         | 20371350 |
| 11 | WEE1    | miR-155  | Reporter assay, Other                                              | 20584899 |
| 11 | PDGFD   | miR-21   | Microarray                                                         | 18591254 |
| 11 | LIMS1   | miR-221  | Sequencing                                                         | 20371350 |
| 11 | EDEM3   | miR-155  | pSILAC, Proteomics, Other                                          | 18668040 |
| 11 | PXN     | miR-221  | CLASH                                                              | 23622248 |
| 11 | FGF2    | miR-155  | Proteomics                                                         | 18668040 |
| 11 | FAS     | miR-21   | Microarray                                                         | 20048743 |
| 11 | JUN     | miR-155  | Luciferase reporter assay, qRT-PCR, Western blot                   | 22508041 |
| 11 | DDB2    | miR-155  | Proteomics                                                         | 18668040 |
| 11 | ERBB2   | miR-21   | qRT-PCR, Western blot                                              | 19419954 |
| 11 | TICAM1  | miR-221  | Luciferase reporter assay, Northern blot, qRT-PCR, Western blot    | 21236259 |
| 11 | MYD88   | miR-155  | Western blot                                                       | 21030878 |
| 11 | RPS6KA3 | miR-21   | Microarray                                                         | 18591254 |
| 11 | FLNA    | miR-222  | CLASH                                                              | 23622248 |
| 11 | FLNA    | miR-221  | CLASH                                                              | 23622248 |

|    |         |          |                                                                                 |          |
|----|---------|----------|---------------------------------------------------------------------------------|----------|
| 11 | FLNA    | miR-155  | Proteomics                                                                      | 18668040 |
| 11 | TIAM1   | miR-221  | CLASH                                                                           | 23622248 |
| 11 | TIAM1   | miR-21   | Luciferase reporter assay, Microarray, Northern blot, qRT-PCR                   | 20826792 |
| 11 | TIAM1   | miR-21   | Luciferase reporter assay                                                       | 23442323 |
| 11 | PTX3    | miR-21   | Luciferase reporter assay                                                       | 21131358 |
| 11 | ZBTB38  | miR-21   | Microarray                                                                      | 18591254 |
| 12 | COL1A1  | miR-143  | Immunoblot, Luciferase reporter assay, qRT-PCR                                  | 19913496 |
| 13 | KLHDC3  | miR-93   | CLASH                                                                           | 23622248 |
| 13 | KLHDC3  | miR-20a  | CLASH                                                                           | 23622248 |
| 13 | UQCRC1  | miR-93   | CLASH                                                                           | 23622248 |
| 13 | UQCRC1  | miR-20a  | CLASH                                                                           | 23622248 |
| 13 | DHX9    | miR-93   | CLASH                                                                           | 23622248 |
| 13 | STIL    | miR-20a  | CLASH                                                                           | 23622248 |
| 13 | GPS1    | miR-93   | CLASH                                                                           | 23622248 |
| 13 | NUP153  | miR-93   | CLASH                                                                           | 23622248 |
| 13 | NUP153  | miR-106b | CLASH                                                                           | 23622248 |
| 13 | NUDT21  | miR-20a  | CLASH                                                                           | 23622248 |
| 13 | SMAD4   | miR-130b | Sequencing                                                                      | 20371350 |
| 13 | SMAD4   | miR-93   | Sequencing                                                                      | 20371350 |
| 13 | SMAD4   | miR-19b  | Sequencing                                                                      | 20371350 |
| 13 | SMAD4   | miR-19a  | Luciferase reporter assay, Microarray                                           | 20940405 |
| 13 | SMAD4   | miR-20a  | Microarray                                                                      | 20940405 |
| 13 | KIF23   | miR-106b | Microarray                                                                      | 17242205 |
| 14 | CAV1    | miR-34b  | Microarray                                                                      | 19461653 |
| 14 | VEGFA   | miR-21   | qRT-PCR                                                                         | 19435867 |
| 14 | VEGFA   | miR-21   | Western blot, qRT-PCR                                                           | 21544242 |
| 14 | VEGFA   | miR-9    | qRT-PCR, Other                                                                  | 20173740 |
| 14 | VEGFA   | miR-34a  | ELISA, Luciferase reporter assay                                                | 18320040 |
| 14 | VEGFA   | miR-34b  | ELISA, Luciferase reporter assay                                                | 18320040 |
| 14 | NRP1    | miR-181a | Microarray                                                                      | 17612493 |
| 14 | NRP1    | miR-181a | Sequencing                                                                      | 20371350 |
| 14 | THBS1   | miR-155  | Proteomics                                                                      | 18668040 |
| 14 | FAM46A  | miR-21   | Microarray                                                                      | 18591254 |
| 14 | FAM46A  | miR-9    | Microarray                                                                      | 17612493 |
| 14 | FAM46A  | miR-34a  | CLASH                                                                           | 23622248 |
| 14 | CAST    | miR-222  | CLASH                                                                           | 23622248 |
| 14 | AIM1    | miR-21   | Microarray                                                                      | 18591254 |
| 14 | FNDC3B  | miR-155  | Proteomics                                                                      | 18668040 |
| 14 | CCL20   | miR-21   | ELISA, Immunofluorescence, Luciferase reporter assay                            | 22001440 |
| 14 | GLIPR1  | miR-155  | Proteomics                                                                      | 18668040 |
| 14 | PLAUR   | miR-155  | Proteomics                                                                      | 18668040 |
| 14 | FLNA    | miR-222  | CLASH                                                                           | 23622248 |
| 14 | FLNA    | miR-155  | Proteomics                                                                      | 18668040 |
| 14 | FLNA    | miR-221  | CLASH                                                                           | 23622248 |
| 14 | FLNA    | miR-23a  | CLASH                                                                           | 23622248 |
| 14 | TGFBI   | miR-21   | Luciferase reporter assay, Western blot                                         | 19136465 |
| 14 | TGFBI   | miR-21   | Microarray                                                                      | 18591254 |
| 14 | TGFBI   | miR-9    | In situ hybridization, Luciferase reporter assay                                | 21720722 |
| 14 | ANXA2   | miR-155  | Proteomics                                                                      | 18668040 |
| 14 | P4HB    | miR-210  | 2DGE, immunoprecipitation, Mass spectrometry, Microarray, qRT-PCR, Western blot | 19826008 |
| 14 | IL13RA1 | miR-155  | Luciferase reporter assay                                                       | 21097505 |
| 14 | GRN     | miR-9    | Reporter assay                                                                  | 20479936 |
| 15 | CENPF   | miR-93   | CLASH                                                                           | 23622248 |
| 15 | REV3L   | miR-93   | Sequencing                                                                      | 20371350 |
| 15 | UBE2C   | miR-20a  | CLASH                                                                           | 23622248 |
| 15 | CENPM   | miR-106b | CLASH                                                                           | 23622248 |
| 15 | CDT1    | miR-20a  | CLASH                                                                           | 23622248 |
| 15 | BUB1B   | miR-22   | CLASH                                                                           | 23622248 |

|    |         |          |                                                                        |          |
|----|---------|----------|------------------------------------------------------------------------|----------|
| 15 | TTC3    | miR-130b | CLASH                                                                  | 23622248 |
| 15 | HN1     | miR-106b | Microarray                                                             | 17242205 |
| 15 | TRIB2   | miR-106b | CLASH                                                                  | 23622248 |
| 15 | GPR162  | miR-93   | CLASH                                                                  | 23622248 |
| 15 | CCND1   | miR-93   | Sequencing                                                             | 20371350 |
| 15 | CCND1   | miR-19a  | flow, Luciferase reporter assay, Microarray, qRT-PCR, Western blot     | 20133739 |
| 15 | CCND1   | miR-106b | Luciferase reporter assay                                              | 21283765 |
| 15 | CCND1   | miR-20a  | Luciferase reporter assay, qRT-PCR, Western blot                       | 18695042 |
| 15 | CCND1   | miR-20a  | Luciferase reporter assay                                              | 21283765 |
| 15 | POLR2A  | miR-93   | CLASH                                                                  | 23622248 |
| 15 | E2F3    | miR-106b | Luciferase reporter assay                                              | 21283765 |
| 15 | E2F3    | miR-20a  | Luciferase reporter assay                                              | 21283765 |
| 15 | KIF4A   | miR-222  | CLASH                                                                  | 23622248 |
| 15 | MAP3K4  | miR-93   | CLASH                                                                  | 23622248 |
| 15 | E2F1    | miR-130b | Sequencing                                                             | 20371350 |
| 15 | E2F1    | miR-93   | Luciferase reporter assay, Western blot                                | 19486339 |
| 15 | E2F1    | miR-93   | Luciferase reporter assay, Microarray, Western blot                    | 18328430 |
| 15 | E2F1    | miR-93   | Sequencing                                                             | 20371350 |
| 15 | E2F1    | miR-106a | Immunohistochemistry, Microarray, Western blot                         | 20643754 |
| 15 | E2F1    | miR-106a | qRT-PCR                                                                | 18521848 |
| 15 | E2F1    | miR-106a | Luciferase reporter assay, Western blot                                | 21656380 |
| 15 | E2F1    | miR-106b | Luciferase reporter assay, qRT-PCR                                     | 18676839 |
| 15 | E2F1    | miR-106b | Luciferase reporter assay, Western blot                                | 19486339 |
| 15 | E2F1    | miR-106b | Luciferase reporter assay, Microarray, Western blot                    | 18328430 |
| 15 | E2F1    | miR-106b | Luciferase reporter assay                                              | 21283765 |
| 15 | E2F1    | miR-106b | Reporter assay                                                         | 18212054 |
| 15 | E2F1    | miR-20a  | Western blot                                                           | 19110058 |
| 15 | E2F1    | miR-20a  | Western blot                                                           | 18025036 |
| 15 | E2F1    | miR-20a  | Western blot                                                           | 18836483 |
| 15 | E2F1    | miR-20a  | Luciferase reporter assay, Northern blot, Western blot, Reporter assay | 15944709 |
| 15 | E2F1    | miR-20a  | Luciferase reporter assay                                              | 21283765 |
| 15 | MAD2L1  | miR-93   | CLASH                                                                  | 23622248 |
| 15 | TCERG1  | miR-222  | CLASH                                                                  | 23622248 |
| 15 | KIF2C   | miR-20a  | CLASH                                                                  | 23622248 |
| 15 | CDC20   | miR-93   | CLASH                                                                  | 23622248 |
| 15 | MYO9B   | miR-93   | CLASH                                                                  | 23622248 |
| 15 | ASF1B   | miR-130b | CLASH                                                                  | 23622248 |
| 15 | FUBP1   | miR-22   | CLASH                                                                  | 23622248 |
| 15 | FUBP1   | miR-222  | CLASH                                                                  | 23622248 |
| 15 | TMPO    | miR-106b | CLASH                                                                  | 23622248 |
| 15 | RPL21   | miR-106b | CLASH                                                                  | 23622248 |
| 15 | RPL21   | miR-20a  | CLASH                                                                  | 23622248 |
| 15 | HERPUD1 | miR-93   | CLASH                                                                  | 23622248 |
| 15 | TRPC3   | miR-130b | Sequencing                                                             | 20371350 |
| 15 | TRPC3   | miR-19b  | Sequencing                                                             | 20371350 |
| 15 | PCNT    | miR-222  | CLASH                                                                  | 23622248 |
| 16 | MKI67   | miR-29b  | CLASH                                                                  | 23622248 |
| 16 | HMMR    | miR-93   | CLASH                                                                  | 23622248 |
| 16 | HMMR    | miR-106b | CLASH                                                                  | 23622248 |
| 16 | KIF2C   | miR-20a  | CLASH                                                                  | 23622248 |
| 16 | ASF1B   | miR-130b | CLASH                                                                  | 23622248 |
| 16 | ASF1B   | miR-18a  | CLASH                                                                  | 23622248 |
| 16 | CHEK1   | miR-15b  | CLASH                                                                  | 23622248 |
| 16 | KIF23   | miR-106b | Microarray                                                             | 17242205 |
| 16 | KIF23   | miR-25   | CLASH                                                                  | 23622248 |
| 16 | CENPN   | miR-19b  | Sequencing                                                             | 20371350 |
| 16 | CDT1    | miR-20a  | CLASH                                                                  | 23622248 |
| 16 | TMPO    | miR-106b | CLASH                                                                  | 23622248 |
| 16 | ATAD2   | miR-106b | Microarray                                                             | 17242205 |

|    |          |          |                                                                                                           |          |
|----|----------|----------|-----------------------------------------------------------------------------------------------------------|----------|
| 16 | STIL     | miR-20a  | CLASH                                                                                                     | 23622248 |
| 16 | OIP5     | miR-29c  | Sequencing                                                                                                | 20371350 |
| 16 | CDC20    | miR-93   | CLASH                                                                                                     | 23622248 |
| 16 | CDC20    | miR-18a  | CLASH                                                                                                     | 23622248 |
| 16 | CDC25A   | miR-18a  | CLASH                                                                                                     | 23622248 |
| 16 | LMNB2    | miR-18a  | Sequencing                                                                                                | 20371350 |
| 16 | LMNB2    | miR-18a  | CLASH                                                                                                     | 23622248 |
| 17 | MMP9     | miR-21   | qRT-PCR                                                                                                   | 19435867 |
| 17 | THBS1    | miR-155  | Proteomics                                                                                                | 18668040 |
| 17 | AIM1     | miR-21   | Microarray                                                                                                | 18591254 |
| 17 | NID2     | miR-181d | CLASH                                                                                                     | 23622248 |
| 17 | COL1A1   | miR-143  | Immunoblot, Luciferase reporter assay, qRT-PCR                                                            | 19913496 |
| 17 | COL4A2   | miR-155  | Proteomics                                                                                                | 18668040 |
| 17 | PXDN     | miR-9    | Microarray                                                                                                | 17612493 |
| 17 | SPON2    | miR-9    | Microarray                                                                                                | 17612493 |
| 17 | COL5A2   | miR-21   | Microarray                                                                                                | 18591254 |
| 17 | COL5A2   | miR-222  | CLASH                                                                                                     | 23622248 |
| 17 | TGFBI    | miR-21   | Luciferase reporter assay, Western blot                                                                   | 19136465 |
| 17 | TGFBI    | miR-21   | Microarray                                                                                                | 18591254 |
| 17 | TGFBI    | miR-9    | In situ hybridization, Luciferase reporter assay                                                          | 21720722 |
| 17 | TAGLN    | miR-9    | Microarray                                                                                                | 17612493 |
| 17 | ITGB1    | miR-9    | Luciferase reporter assay                                                                                 | 23530058 |
| 17 | MYH9     | miR-9    | Microarray                                                                                                | 17612493 |
| 17 | CALD1    | miR-21   | Microarray                                                                                                | 18591254 |
| 17 | ITGA4    | miR-30c  | qRT-PCR                                                                                                   | 23418453 |
| 17 | SERPINE1 | miR-145  | Immunoblot, Luciferase reporter assay, qRT-PCR, Western blot                                              | 22108519 |
| 17 | SERPINE1 | miR-30c  | Luciferase reporter assay                                                                                 | 21175428 |
| 17 | SERPINE1 | miR-143  | Immunoblot, Luciferase reporter assay, qRT-PCR, Western blot                                              | 22108519 |
| 18 | MPP2     | miR-155  | Proteomics                                                                                                | 18668040 |
| 20 | SNCA     | miR-7    | qRT-PCR, Luciferase reporter assay, Western blot                                                          | 19628698 |
| 20 | SNCA     | miR-7    | Immunocytochemistry, Luciferase reporter assay, qRT-PCR, Western blot                                     | 20106983 |
| 21 | PTX3     | miR-21   | Luciferase reporter assay                                                                                 | 21131358 |
| 21 | ADAM9    | miR-23a  | CLASH                                                                                                     | 23622248 |
| 21 | ZYX      | miR-221  | CLASH                                                                                                     | 23622248 |
| 21 | BCAT1    | miR-21   | Microarray                                                                                                | 18591254 |
| 21 | BCAT1    | miR-155  | Microarray                                                                                                | 19193853 |
| 21 | BACH1    | miR-155  | Luciferase reporter assay, Microarray, qRT-PCR                                                            | 19193853 |
| 21 | BACH1    | miR-155  | qRT-PCR, Luciferase reporter assay                                                                        | 18299402 |
| 21 | BACH1    | miR-155  | Luciferase reporter assay                                                                                 | 18367535 |
| 21 | BACH1    | miR-155  | Immunohistochemistry, In situ hybridization, Luciferase reporter assay, Microarray, qRT-PCR, Western blot | 21541331 |
| 21 | BACH1    | miR-155  | Reporter assay, Other                                                                                     | 20584899 |
| 21 | BACH1    | miR-155  | Reporter assay                                                                                            | 17881434 |
| 21 | LIMS1    | miR-221  | Sequencing                                                                                                | 20371350 |
| 21 | RAB8B    | miR-101  | Sequencing                                                                                                | 20371350 |
| 21 | PODXL    | miR-155  | pSILAC, Proteomics, Other                                                                                 | 18668040 |
| 21 | SERPINE1 | miR-99a  | Luciferase reporter assay                                                                                 | 21175428 |
| 21 | CHSY1    | miR-9    | Sequencing                                                                                                | 20371350 |
| 21 | ICAM1    | miR-21   | Luciferase reporter assay, Microarray, qRT-PCR                                                            | 21131358 |
| 21 | ICAM1    | miR-222  | Luciferase reporter assay                                                                                 | 19949084 |
| 21 | ICAM1    | miR-155  | Luciferase reporter assay                                                                                 | 19949084 |
| 21 | ICAM1    | miR-155  | qRT-PCR                                                                                                   | 21310411 |
| 21 | ICAM1    | miR-221  | Luciferase reporter assay, Western blot                                                                   | 20110463 |
| 21 | ICAM1    | miR-221  | Luciferase reporter assay                                                                                 | 19949084 |
| 21 | FOSL2    | miR-99a  | CLASH                                                                                                     | 23622248 |
| 21 | ITPKC    | miR-23a  | CLASH                                                                                                     | 23622248 |
| 21 | PLAUR    | miR-155  | Proteomics                                                                                                | 18668040 |
| 21 | CALD1    | miR-21   | Microarray                                                                                                | 18591254 |
| 21 | CALD1    | miR-34a  | Proteomics                                                                                                | 21566225 |

|    |         |          |                                                                                                |           |
|----|---------|----------|------------------------------------------------------------------------------------------------|-----------|
| 21 | TGFBI   | miR-21   | Luciferase reporter assay, Western blot                                                        | 19136465  |
| 21 | TGFBI   | miR-21   | Microarray                                                                                     | 18591254  |
| 21 | TGFBI   | miR-9    | In situ hybridization, Luciferase reporter assay                                               | 21720722  |
| 21 | CAST    | miR-222  | CLASH                                                                                          | 23622248  |
| 21 | MCL1    | miR-181a | Luciferase reporter assay                                                                      | 22610076  |
| 21 | MCL1    | miR-101  | Luciferase reporter assay, qRT-PCR, Western blot, Reporter assay                               | 19155302  |
| 21 | MCL1    | miR-101  | Luciferase reporter assay, Western blot                                                        | 20829195  |
| 21 | MCL1    | miR-101  | qRT-PCR                                                                                        | 20712078  |
| 21 | MCL1    | miR-181b | Luciferase reporter assay                                                                      | 22610076  |
| 21 | FLNA    | miR-222  | CLASH                                                                                          | 23622248  |
| 21 | FLNA    | miR-155  | Proteomics                                                                                     | 18668040  |
| 21 | FLNA    | miR-221  | CLASH                                                                                          | 23622248  |
| 21 | FLNA    | miR-23a  | CLASH                                                                                          | 23622248  |
| 21 | CDKN1A  | miR-146b | Luciferase reporter assay                                                                      | 210101223 |
| 21 | IL13RA1 | miR-155  | Luciferase reporter assay                                                                      | 21097505  |
| 21 | SDCBP   | miR-155  | pSILAC, Proteomics                                                                             | 18668040  |
| 21 | SDCBP   | miR-155  | Reporter assay, Other                                                                          | 20584899  |
| 21 | FAS     | miR-21   | Microarray                                                                                     | 20048743  |
| 21 | FAS     | miR-504  | qRT-PCR                                                                                        | 20542001  |
| 21 | CALU    | miR-155  | Proteomics                                                                                     | 18668040  |
| 21 | CTNNA1  | miR-155  | Proteomics                                                                                     | 18668040  |
| 21 | DUSP5   | miR-181a | Luciferase reporter assay, Western blot                                                        | 17382377  |
| 21 | DUSP5   | miR-27a  | CLASH                                                                                          | 23622248  |
| 21 | DUSP1   | miR-101  | Luciferase reporter assay, qRT-PCR, Western blot                                               | 21068409  |
| 21 | COL5A2  | miR-21   | Microarray                                                                                     | 18591254  |
| 21 | COL5A2  | miR-222  | CLASH                                                                                          | 23622248  |
| 21 | GRN     | miR-9    | Reporter assay                                                                                 | 20479936  |
| 21 | DNAJB1  | miR-155  | pSILAC, Proteomics, Other                                                                      | 18668040  |
| 22 | SOD2    | miR-222  | Flow, Luciferase reporter assay, Microarray, qRT-PCR, Western blot                             | 19487542  |
| 22 | DSE     | miR-21   | Microarray                                                                                     | 18591254  |
| 22 | TRIM38  | miR-21   | Microarray                                                                                     | 18591254  |
| 22 | GRN     | miR-9    | Reporter assay                                                                                 | 20479936  |
| 22 | LHFPL2  | miR-221  | Sequencing                                                                                     | 20371350  |
| 22 | LHFPL2  | miR-93   | Sequencing                                                                                     | 20371350  |
| 22 | SYNGR2  | miR-9    | Sequencing                                                                                     | 20371350  |
| 22 | TLR2    | miR-19b  | Luciferase reporter assay, qRT-PCR, Western blot                                               | 22105995  |
| 22 | TLR2    | miR-106b | Microarray                                                                                     | 17242205  |
| 22 | TLR2    | miR-19a  | Luciferase reporter assay, qRT-PCR, Western blot                                               | 22105995  |
| 22 | MGAT4A  | miR-21   | Microarray                                                                                     | 18591254  |
| 22 | SLC2A5  | miR-9    | Microarray                                                                                     | 17612493  |
| 22 | HERPUD1 | miR-93   | CLASH                                                                                          | 23622248  |
| 22 | MYD88   | miR-155  | Western blot                                                                                   | 21030878  |
| 22 | PLAUR   | miR-155  | Proteomics                                                                                     | 18668040  |
| 22 | STAT1   | miR-34a  | Proteomics                                                                                     | 21566225  |
| 22 | CEBPB   | miR-34a  | Luciferase reporter assay, Reporter assay                                                      | 20598588  |
| 22 | CEBPB   | miR-155  | Luciferase reporter assay                                                                      | 18367535  |
| 22 | CEBPB   | miR-155  | Microarray, qRT-PCR, Western blot                                                              | 19193853  |
| 22 | CEBPB   | miR-155  | Luciferase reporter assay, qRT-PCR, Western blot                                               | 20427544  |
| 22 | CEBPB   | miR-155  | pSILAC, Proteomics                                                                             | 18668040  |
| 22 | CEBPB   | miR-155  | Luciferase reporter assay                                                                      | 19596814  |
| 22 | CEBPB   | miR-155  | ELISA, Immunoblot, Immunocytochemistry, Immunofluorescence, Luciferase reporter assay, qRT-PCR | 19887047  |
| 22 | AP1B1   | miR-222  | CLASH                                                                                          | 23622248  |
| 22 | DUSP6   | miR-181a | Luciferase reporter assay, Western blot                                                        | 17382377  |
| 22 | INCENP  | miR-181a | Microarray                                                                                     | 17612493  |
| 22 | AAMP    | miR-130b | CLASH                                                                                          | 23622248  |
| 22 | CD81    | miR-155  | Proteomics                                                                                     | 18668040  |
| 22 | CSF1    | miR-130b | ELISA, Luciferase reporter assay, qRT-PCR                                                      | 22005523  |
| 22 | CCR1    | miR-21   | Luciferase reporter assay                                                                      | 21131358  |

|    |         |          |                                                                                                           |          |
|----|---------|----------|-----------------------------------------------------------------------------------------------------------|----------|
| 22 | PSAP    | miR-19b  | Sequencing                                                                                                | 20371350 |
| 22 | PSAP    | miR-130b | Sequencing                                                                                                | 20371350 |
| 22 | PSAP    | miR-19a  | Luciferase reporter assay                                                                                 | 23451058 |
| 22 | SH3GLB1 | miR-93   | Sequencing                                                                                                | 20371350 |
| 22 | IL13RA1 | miR-155  | Luciferase reporter assay                                                                                 | 21097505 |
| 24 | BACH1   | miR-155  | Luciferase reporter assay, Microarray, qRT-PCR                                                            | 19193853 |
| 24 | BACH1   | miR-155  | qRT-PCR, Luciferase reporter assay                                                                        | 18299402 |
| 24 | BACH1   | miR-155  | Luciferase reporter assay                                                                                 | 18367535 |
| 24 | BACH1   | miR-155  | Immunohistochemistry, In situ hybridization, Luciferase reporter assay, Microarray, qRT-PCR, Western blot | 21541331 |
| 24 | BACH1   | miR-155  | Reporter assay, Other                                                                                     | 20584899 |
| 24 | BACH1   | miR-155  | Reporter assay                                                                                            | 17881434 |
| 24 | SNAP23  | miR-34a  | Proteomics                                                                                                | 21566225 |
| 24 | TGFBR2  | miR-21   | qRT-PCR, Western blot                                                                                     | 19906824 |
| 24 | TGFBR2  | miR-21   | qRT-PCR, Luciferase reporter assay, Western blot, Reporter assay                                          | 19816956 |
| 24 | TGFBR2  | miR-21   | Luciferase reporter assay, qRT-PCR, Western blot                                                          | 18829576 |
| 24 | TGFBR2  | miR-21   | Luciferase reporter assay, Western blot                                                                   | 22072622 |
| 24 | TGFBR2  | miR-21   | Microarray                                                                                                | 18591254 |
| 24 | DDX3X   | miR-21   | Microarray                                                                                                | 18591254 |
| 24 | DDX3X   | miR-181a | Sequencing                                                                                                | 20371350 |
| 24 | DDX3X   | miR-181a | CLASH                                                                                                     | 23622248 |
| 24 | ADAM10  | miR-155  | Proteomics                                                                                                | 21030878 |
| 24 | FLI1    | miR-155  | Western blot                                                                                              | 18950466 |
| 24 | FLI1    | miR-155  | Proteomics                                                                                                | 20584899 |
| 24 | TMOD3   | miR-34a  | Proteomics                                                                                                | 21566225 |
| 24 | TMOD3   | miR-155  | Proteomics                                                                                                | 18668040 |
| 24 | NFKB1   | miR-21   | ChIP-seq                                                                                                  | 21081469 |
| 24 | NFKB1   | miR-146b | Luciferase reporter assay                                                                                 | 18504431 |
| 24 | NFKB1   | miR-155  | Proteomics                                                                                                | 21030878 |
| 24 | NFKB1   | miR-9    | qRT-PCR, Luciferase reporter assay, Western blot                                                          | 19702828 |
| 24 | NFKB1   | miR-9    | GFP reporter assay, qRT-PCR, Western blot                                                                 | 20102618 |
| 24 | NFKB1   | miR-9    | GFP reporter assay, Western blot, EGFP reporter assay, qRT-PCR                                            | 22131135 |
| 24 | NFKB1   | miR-9    | Reporter assay, Western blot                                                                              | 19289835 |
| 24 | PICALM  | miR-155  | pSILAC, Proteomics                                                                                        | 18668040 |
| 24 | PICALM  | miR-155  | Reporter assay, Other                                                                                     | 20584899 |
| 24 | LPXN    | miR-9    | Microarray                                                                                                | 17612493 |
| 24 | GRN     | miR-9    | Reporter assay                                                                                            | 20479936 |
| 24 | IL13RA1 | miR-155  | Luciferase reporter assay                                                                                 | 21097505 |
| 25 | PTX3    | miR-21   | Luciferase reporter assay                                                                                 | 21131358 |
| 25 | VEGFA   | miR-21   | qRT-PCR                                                                                                   | 19435867 |
| 25 | VEGFA   | miR-21   | Western blot, qRT-PCR                                                                                     | 21544242 |
| 25 | VEGFA   | miR-34a  | ELISA, Luciferase reporter assay                                                                          | 18320040 |
| 25 | VEGFA   | miR-9    | qRT-PCR, Other                                                                                            | 20173740 |
| 25 | VEGFA   | miR-34b  | ELISA, Luciferase reporter assay                                                                          | 18320040 |
| 25 | VEGFA   | miR-93   | ELISA, Luciferase reporter assay                                                                          | 18320040 |
| 25 | VEGFA   | miR-20b  | ELISA, Luciferase reporter assay                                                                          | 18320040 |
| 25 | VEGFA   | miR-106a | ELISA, Luciferase reporter assay                                                                          | 18320040 |
| 25 | SOD2    | miR-222  | Flow, Luciferase reporter assay, Microarray, qRT-PCR, Western blot                                        | 19487542 |
| 25 | CLIC4   | miR-155  | Proteomics                                                                                                | 20584899 |
| 25 | TGFB2   | miR-21   | Microarray                                                                                                | 18591254 |
| 25 | KLF6    | miR-181a | Luciferase reporter assay, qRT-PCR, Western blot                                                          | 22581522 |
| 25 | CD44    | miR-34a  | Immunohistochemistry, qRT-PCR, Western blot, Reporter assay, Other                                        | 21240262 |
| 25 | ZFP36L2 | miR-181a | CLASH                                                                                                     | 23622248 |
| 25 | EXOC5   | miR-21   | Microarray                                                                                                | 18591254 |
| 25 | STAT3   | miR-21   | Western blot, Other                                                                                       | 20048743 |
| 25 | STAT3   | miR-21   | Microarray                                                                                                | 18591254 |
| 25 | STAT3   | miR-155  | Proteomics                                                                                                | 18668040 |
| 25 | STAT3   | miR-93   | Sequencing                                                                                                | 20371350 |
| 25 | STAT3   | miR-20b  | qRT-PCR, ELISA, ChIP, Western blot                                                                        | 20232316 |



|    |         |          |                                                  |          |
|----|---------|----------|--------------------------------------------------|----------|
| 25 | FAS     | miR-21   | Microarray                                       | 20048743 |
| 25 | FAS     | miR-106a | Luciferase reporter assay                        | 22431000 |
| 25 | CPD     | miR-155  | Proteomics                                       | 18668040 |
| 25 | CPD     | miR-19b  | Sequencing                                       | 20371350 |
| 25 | BCL6    | miR-21   | Luciferase reporter assay                        | 23416424 |
| 25 | BCL6    | miR-155  | Luciferase reporter assay                        | 23041630 |
| 25 | BCL6    | miR-9    | Luciferase reporter assay                        | 19956200 |
| 25 | ACTN1   | miR-93   | CLASH                                            | 23622248 |
| 25 | CALD1   | miR-21   | Microarray                                       | 18591254 |
| 25 | CALD1   | miR-34a  | Proteomics                                       | 21566225 |
| 25 | IL13RA1 | miR-155  | Luciferase reporter assay                        | 21097505 |
| 25 | TLR2    | miR-19b  | Luciferase reporter assay, qRT-PCR, Western blot | 22105995 |
| 25 | TLR2    | miR-19a  | Luciferase reporter assay, qRT-PCR, Western blot | 22105995 |
| 25 | CAST    | miR-222  | CLASH                                            | 23622248 |
| 25 | TGFBI   | miR-21   | Luciferase reporter assay, Western blot          | 19136465 |
| 25 | TGFBI   | miR-21   | Microarray                                       | 18591254 |
| 25 | TGFBI   | miR-9    | In situ hybridization, Luciferase reporter assay | 21720722 |
| 25 | BIRC3   | miR-34a  | Microarray, Northern blot                        | 17540599 |
| 25 | FLNA    | miR-155  | Proteomics                                       | 18668040 |
| 25 | FLNA    | miR-222  | CLASH                                            | 23622248 |
| 25 | FLNA    | miR-221  | CLASH                                            | 23622248 |
| 25 | FLNA    | miR-23a  | CLASH                                            | 23622248 |
| 25 | THBS1   | miR-155  | Proteomics                                       | 18668040 |
| 25 | JUNB    | miR-155  | Proteomics                                       | 18668040 |
| 25 | ICAM1   | miR-21   | Luciferase reporter assay, Microarray, qRT-PCR   | 21131358 |
| 25 | ICAM1   | miR-155  | Luciferase reporter assay                        | 19949084 |
| 25 | ICAM1   | miR-155  | qRT-PCR                                          | 21310411 |
| 25 | ICAM1   | miR-222  | Luciferase reporter assay                        | 19949084 |
| 25 | ICAM1   | miR-221  | Luciferase reporter assay, Western blot          | 20110463 |
| 25 | ICAM1   | miR-221  | Luciferase reporter assay                        | 19949084 |
| 25 | PLAUR   | miR-155  | Proteomics                                       | 18668040 |
| 26 | RTN3    | miR-155  | Proteomics                                       | 18668040 |
| 26 | ELAVL4  | miR-21   | qRT-PCR                                          | 20584986 |
| 26 | KIF1B   | miR-9    | Microarray                                       | 17612493 |
| 26 | RABGAP1 | miR-9    | Microarray                                       | 17612493 |
| 26 | RABGAP1 | miR-21   | Microarray                                       | 18591254 |
| 26 | PHF16   | miR-21   | Microarray                                       | 18591254 |
| 26 | ZNF248  | miR-155  | Reporter assay, Other                            | 20584899 |
| 26 | ALDH5A1 | miR-155  | Proteomics                                       | 18668040 |
| 26 | NTRK3   | miR-9    | Luciferase reporter assay, Western blot          | 17483472 |
| 26 | NTRK3   | miR-9    | Luciferase reporter assay                        | 19188439 |
| 26 | NTRK3   | miR-9    | Luciferase reporter assay                        | 18973228 |
| 26 | ZMYND11 | miR-222  | CLASH                                            | 23622248 |
| 26 | PPP1R9A | miR-181a | CLASH                                            | 23622248 |
| 26 | SPTBN1  | miR-9    | Microarray                                       | 17612493 |
| 26 | RAPGEF2 | miR-155  | Reporter assay, Other                            | 20584899 |
| 26 | RAPGEF4 | miR-98   | Microarray                                       | 19088304 |
| 26 | RNF2    | miR-155  | Proteomics                                       | 18668040 |
| 26 | NOTCH1  | miR-181a | Luciferase reporter assay, Western blot          | 22916024 |
| 26 | APC     | miR-21   | Microarray                                       | 18591254 |
| 26 | APC     | miR-155  | Luciferase reporter assay, Western blot          | 19136465 |
| 26 | APC     | miR-155  | Proteomics                                       | 20584899 |
| 26 | RBM8A   | miR-340  | Sequencing                                       | 20371350 |
| 26 | PIK3R1  | miR-21   | Microarray                                       | 18591254 |
| 26 | TCF12   | miR-155  | Reporter assay, Other                            | 20584899 |
| 26 | QKI     | miR-222  | CLASH                                            | 23622248 |
| 26 | ICAM1   | miR-21   | Luciferase reporter assay, Microarray, qRT-PCR   | 21131358 |
| 26 | ICAM1   | miR-222  | Luciferase reporter assay                        | 19949084 |
| 26 | ICAM1   | miR-155  | Luciferase reporter assay                        | 19949084 |

|    |          |          |                                                  |          |
|----|----------|----------|--------------------------------------------------|----------|
| 26 | ICAM1    | miR-155  | qRT-PCR                                          | 21310411 |
| 26 | ICAM1    | miR-98   | Microarray                                       | 19088304 |
| 26 | NEK1     | miR-21   | Microarray                                       | 18591254 |
| 26 | PTPN22   | miR-181a | Luciferase reporter assay, Western blot          | 17382377 |
| 26 | NKX2-2   | miR-9    | Microarray                                       | 17612493 |
| 26 | CHD9     | miR-155  | Reporter assay, Other                            | 20584899 |
| 26 | HIPK2    | miR-181a | Immunoblot, Luciferase reporter assay, qRT-PCR   | 21274007 |
| 26 | HIPK2    | miR-222  | CLASH                                            | 23622248 |
| 26 | HDAC4    | miR-22   | Luciferase reporter assay, qRT-PCR, Western blot | 20842113 |
| 26 | HDAC4    | miR-22   | Luciferase reporter assay                        | 23349832 |
| 26 | BMPR2    | miR-21   | Luciferase reporter assay, qRT-PCR, Western blot | 19578724 |
| 26 | BMPR2    | miR-21   | Luciferase reporter assay, qRT-PCR               | 18829576 |
| 26 | BMPR2    | miR-21   | Microarray                                       | 18591254 |
| 26 | BMPR2    | miR-181c | Luciferase reporter assay                        | 23352489 |
| 26 | DBN1     | miR-222  | CLASH                                            | 23622248 |
| 26 | DBN1     | miR-155  | Proteomics                                       | 18668040 |
| 27 | BIRC5    | miR-93   | CLASH                                            | 23622248 |
| 27 | CENPF    | miR-93   | CLASH                                            | 23622248 |
| 27 | CDC20    | miR-93   | CLASH                                            | 23622248 |
| 27 | MAD2L1   | miR-93   | CLASH                                            | 23622248 |
| 27 | KIF23    | miR-106b | Microarray                                       | 17242205 |
| 28 | TGFB1    | miR-21   | Microarray                                       | 18591254 |
| 28 | CAPG     | miR-34a  | Proteomics                                       | 21566225 |
| 29 | BIRC5    | miR-93   | CLASH                                            | 23622248 |
| 29 | EZH2     | miR-93   | CLASH                                            | 23622248 |
| 30 | IL13RA1  | miR-155  | Luciferase reporter assay                        | 21097505 |
| 30 | CAPG     | miR-34a  | Proteomics                                       | 21566225 |
| 30 | GRN      | miR-9    | Reporter assay                                   | 20479936 |
| 30 | SERPINB1 | miR-34a  | Proteomics                                       | 21566225 |
| 30 | LYN      | miR-222  | CLASH                                            | 23622248 |
| 30 | SYNGR2   | miR-9    | Sequencing                                       | 20371350 |
| 30 | TLR2     | miR-19b  | Luciferase reporter assay, qRT-PCR, Western blot | 22105995 |
| 30 | MAFB     | miR-155  | Microarray                                       | 19193853 |
| 30 | MGAT4A   | miR-21   | Microarray                                       | 18591254 |
| 30 | SLC2A5   | miR-9    | Microarray                                       | 17612493 |
| 30 | CCR1     | miR-21   | Luciferase reporter assay                        | 21131358 |
| 30 | SPI1     | miR-34a  | Luciferase reporter assay, Reporter assay        | 20598588 |
| 30 | SPI1     | miR-9    | Microarray                                       | 17612493 |
| 30 | SPI1     | miR-155  | Luciferase reporter assay                        | 19386588 |
| 30 | SPI1     | miR-155  | Reporter assay                                   | 20680360 |
| 30 | SPI1     | miR-155  | Proteomics                                       | 18668040 |
| 30 | CORO1A   | miR-222  | Western blot                                     | 21226887 |
| 31 | CAST     | miR-222  | CLASH                                            | 23622248 |
| 31 | S100A11  | miR-155  | Proteomics                                       | 18668040 |
| 31 | LYN      | miR-222  | CLASH                                            | 23622248 |
| 33 | PYGL     | miR-155  | Proteomics                                       | 18668040 |
| 33 | PYGL     | miR-93   | CLASH                                            | 23622248 |
| 33 | PTX3     | miR-21   | Luciferase reporter assay                        | 21131358 |
| 33 | PTRF     | miR-342  | CLASH                                            | 23622248 |
| 33 | TAGLN2   | miR-93   | CLASH                                            | 23622248 |
| 33 | DDB2     | miR-155  | Proteomics                                       | 18668040 |
| 33 | RRBP1    | miR-34a  | Proteomics                                       | 21566225 |
| 33 | FAS      | miR-21   | Microarray                                       | 20048743 |
| 33 | FAS      | miR-504  | qRT-PCR                                          | 20542001 |
| 33 | FAS      | miR-106a | Luciferase reporter assay                        | 22431000 |
| 33 | OSBPL3   | miR-21   | Microarray                                       | 18591254 |
| 33 | LDHA     | miR-34a  | Reporter assay, Proteomics                       | 21566225 |
| 33 | LDHA     | miR-23a  | CLASH                                            | 23622248 |
| 33 | CLIC1    | miR-221  | CLASH                                            | 23622248 |

|    |         |          |                                                                                 |          |
|----|---------|----------|---------------------------------------------------------------------------------|----------|
| 33 | ANXA2   | miR-155  | Proteomics                                                                      | 18668040 |
| 33 | CAST    | miR-222  | CLASH                                                                           | 23622248 |
| 33 | CBR1    | miR-93   | CLASH                                                                           | 23622248 |
| 33 | SORT1   | miR-222  | CLASH                                                                           | 23622248 |
| 33 | SORT1   | miR-34a  | Proteomics                                                                      | 21566225 |
| 33 | CTNNA1  | miR-155  | Proteomics                                                                      | 18668040 |
| 33 | PLAUR   | miR-155  | Proteomics                                                                      | 18668040 |
| 33 | PLAUR   | miR-204  | Microarray                                                                      | 21282569 |
| 33 | VIM     | miR-9    | Western blot                                                                    | 20173740 |
| 33 | DAG1    | miR-222  | CLASH                                                                           | 23622248 |
| 33 | DAG1    | miR-155  | Proteomics                                                                      | 18668040 |
| 34 | NASP    | miR-29a  | Luciferase reporter assay, Western blot                                         | 22080513 |
| 34 | NASP    | miR-29a  | Luciferase reporter assay                                                       | 22194605 |
| 34 | HNRNPA1 | miR-22   | CLASH                                                                           | 23622248 |
| 34 | HNRNPA1 | miR-19b  | Sequencing                                                                      | 20371350 |
| 34 | GPATCH8 | miR-19b  | Sequencing                                                                      | 20371350 |
| 35 | PYGL    | miR-155  | Proteomics                                                                      | 18668040 |
| 35 | PLOD2   | miR-221  | Sequencing                                                                      | 20371350 |
| 35 | VEGFA   | miR-504  | ELISA, Luciferase reporter assay                                                | 18320040 |
| 35 | VEGFA   | miR-21   | qRT-PCR                                                                         | 19435867 |
| 35 | VEGFA   | miR-21   | Western blot, qRT-PCR                                                           | 21544242 |
| 35 | VEGFA   | miR-34a  | ELISA, Luciferase reporter assay                                                | 18320040 |
| 35 | VEGFA   | miR-101  | Sequencing                                                                      | 20371350 |
| 35 | VEGFA   | miR-34b  | ELISA, Luciferase reporter assay                                                | 18320040 |
| 35 | P4HB    | miR-210  | 2DGE, immunoprecipitation, Mass spectrometry, Microarray, qRT-PCR, Western blot | 19826008 |
| 35 | CALU    | miR-155  | Proteomics                                                                      | 18668040 |
| 35 | PLOD3   | miR-21   | Luciferase reporter assay, Quantitative proteomic approach                      | 19253296 |
| 35 | GPI     | miR-34a  | Proteomics                                                                      | 21566225 |
| 35 | CANX    | miR-222  | CLASH                                                                           | 23622248 |
| 35 | CANX    | miR-342  | CLASH                                                                           | 23622248 |
| 35 | GNB2    | miR-23a  | CLASH                                                                           | 23622248 |
| 35 | NSUN5   | miR-155  | Proteomics                                                                      | 18668040 |
| 35 | NSUN5   | miR-222  | CLASH                                                                           | 23622248 |
| 35 | NSUN5   | miR-34a  | Proteomics                                                                      | 21566225 |
| 35 | ZYX     | miR-221  | CLASH                                                                           | 23622248 |
| 35 | IL1RAP  | miR-204  | Microarray                                                                      | 21282569 |
| 35 | COL4A2  | miR-155  | Proteomics                                                                      | 18668040 |
| 35 | PRKCSH  | miR-342  | CLASH                                                                           | 23622248 |
| 35 | PLAUR   | miR-155  | Proteomics                                                                      | 18668040 |
| 35 | PLAUR   | miR-204  | Microarray                                                                      | 21282569 |
| 36 | RTN2    | miR-20a  | CLASH                                                                           | 23622248 |
| 36 | YWHAQ   | miR-93   | CLASH                                                                           | 23622248 |
| 36 | PAIP1   | miR-20a  | CLASH                                                                           | 23622248 |
| 36 | STMN1   | miR-9    | Reporter assay, Western blot, qRT-PCR                                           | 20362537 |
| 36 | STMN1   | miR-223  | Luciferase reporter assay, qRT-PCR, Western blot                                | 18555017 |
| 36 | STMN1   | miR-223  | Flow, Immunohistochemistry, Luciferase reporter assay, qRT-PCR, Western blot    | 22470493 |
| 36 | SIRT1   | miR-9    | In situ hybridization, Luciferase reporter assay                                | 21720722 |
| 36 | SIRT1   | miR-9    | Western blot, qRT-PCR                                                           | 20362537 |
| 36 | RPS6KA5 | miR-19a  | CLASH                                                                           | 23622248 |
| 36 | RPS6KA5 | miR-93   | CLASH                                                                           | 23622248 |
| 36 | POLD3   | miR-130b | CLASH                                                                           | 23622248 |
| 36 | CDKN1B  | miR-222  | Luciferase reporter assay, Western blot, Western blot, Other, Northern blot     | 17569667 |
| 36 | CDKN1B  | miR-222  | qRT-PCR, Luciferase reporter assay, Western blot                                | 19153141 |
| 36 | CDKN1B  | miR-222  | Western blot, Northern blot                                                     | 19107213 |
| 36 | CDKN1B  | miR-222  | Luciferase reporter assay, Western blot                                         | 19859555 |
| 36 | CDKN1B  | miR-222  | Luciferase reporter assay, qRT-PCR, Western blot                                | 18417445 |

|    |         |          |                                                                                                                                   |          |
|----|---------|----------|-----------------------------------------------------------------------------------------------------------------------------------|----------|
| 36 | CDKN1B  | miR-222  | Luciferase reporter assay                                                                                                         | 19150885 |
| 36 | CDKN1B  | miR-222  | Luciferase reporter assay                                                                                                         | 18983236 |
| 36 | CDKN1B  | miR-222  | Luciferase reporter assay                                                                                                         | 18246122 |
| 36 | CDKN1B  | miR-222  | immunohistochemistry, Microarray, qRT-PCR                                                                                         | 20012062 |
| 36 | CDKN1B  | miR-222  | Northern blot, qRT-PCR, Western blot                                                                                              | 20018759 |
| 36 | CDKN1B  | miR-222  | Immunohistochemistry, In situ hybridization, Luciferase reporter assay, Northern blot, Western blot, Reporter assay, Western blot | 19424584 |
| 36 | CDKN1B  | miR-222  | Western blot, Reporter assay                                                                                                      | 17721077 |
| 36 | CDKN1B  | miR-222  | Luciferase reporter assay                                                                                                         | 17627278 |
| 36 | CDKN1B  | miR-222  | qRT-PCR, Western blot                                                                                                             | 18708351 |
| 36 | CDKN1B  | miR-222  | qRT-PCR                                                                                                                           | 23447020 |
| 36 | CDKN1B  | miR-222  | Reporter assay                                                                                                                    | 17914108 |
| 36 | CDKN1B  | miR-222  | Reporter assay                                                                                                                    | 18413744 |
| 36 | SRPK1   | miR-93   | Sequencing                                                                                                                        | 20371350 |
| 37 | ASF1B   | miR-130b | CLASH                                                                                                                             | 23622248 |
| 37 | ASF1B   | miR-18a  | CLASH                                                                                                                             | 23622248 |
| 37 | CHEK1   | miR-15b  | CLASH                                                                                                                             | 23622248 |
| 37 | SMCHD1  | miR-18a  | CLASH                                                                                                                             | 23622248 |
| 37 | KIF23   | miR-106b | Microarray                                                                                                                        | 17242205 |
| 37 | KIF23   | miR-25   | CLASH                                                                                                                             | 23622248 |
| 37 | TMPO    | miR-106b | CLASH                                                                                                                             | 23622248 |
| 37 | E2F8    | miR-19b  | Sequencing                                                                                                                        | 20371350 |
| 37 | RIF1    | miR-93   | CLASH                                                                                                                             | 23622248 |
| 37 | ATAD2   | miR-106b | Microarray                                                                                                                        | 17242205 |
| 37 | KIF2C   | miR-20a  | CLASH                                                                                                                             | 23622248 |
| 37 | STIL    | miR-20a  | CLASH                                                                                                                             | 23622248 |
| 37 | BIRC5   | miR-93   | CLASH                                                                                                                             | 23622248 |
| 37 | MXD3    | miR-18a  | CLASH                                                                                                                             | 23622248 |
| 37 | CENPF   | miR-93   | CLASH                                                                                                                             | 23622248 |
| 37 | EZH2    | miR-93   | CLASH                                                                                                                             | 23622248 |
| 37 | EZH2    | miR-25   | Luciferase reporter assay, qRT-PCR, Western blot                                                                                  | 22399519 |
| 37 | HMMR    | miR-93   | CLASH                                                                                                                             | 23622248 |
| 37 | HMMR    | miR-106b | CLASH                                                                                                                             | 23622248 |
| 37 | OIP5    | miR-29c  | Sequencing                                                                                                                        | 20371350 |
| 37 | MAD2L1  | miR-93   | CLASH                                                                                                                             | 23622248 |
| 38 | DDAH1   | miR-21   | Microarray                                                                                                                        | 18591254 |
| 38 | NOL4    | miR-181a | Microarray                                                                                                                        | 17612493 |
| 38 | NKX2-2  | miR-9    | Microarray                                                                                                                        | 17612493 |
| 38 | APC     | miR-21   | Microarray                                                                                                                        | 18591254 |
| 39 | ALDH5A1 | miR-155  | Proteomics                                                                                                                        | 18668040 |
| 39 | NTRK3   | miR-9    | Luciferase reporter assay, Western blot                                                                                           | 17483472 |
| 39 | NTRK3   | miR-9    | Luciferase reporter assay                                                                                                         | 19188439 |
| 39 | NTRK3   | miR-9    | Luciferase reporter assay                                                                                                         | 18973228 |
| 39 | HIPK2   | miR-181a | Immunoblot, Luciferase reporter assay, qRT-PCR                                                                                    | 21274007 |
| 39 | HIPK2   | miR-222  | CLASH                                                                                                                             | 23622248 |
| 39 | NEK1    | miR-21   | Microarray                                                                                                                        | 18591254 |
| 40 | EZH2    | miR-93   | CLASH                                                                                                                             | 23622248 |
| 40 | NASP    | miR-93   | CLASH                                                                                                                             | 23622248 |
| 40 | NASP    | miR-29a  | Luciferase reporter assay, Western blot                                                                                           | 22080513 |
| 40 | NASP    | miR-29a  | Luciferase reporter assay                                                                                                         | 22194605 |
| 40 | MCM7    | miR-93   | CLASH                                                                                                                             | 23622248 |
| 40 | CENPF   | miR-93   | CLASH                                                                                                                             | 23622248 |
| 40 | TLK2    | miR-93   | CLASH                                                                                                                             | 23622248 |
| 40 | POLD3   | miR-130b | CLASH                                                                                                                             | 23622248 |
| 40 | POLD3   | miR-29a  | CLASH                                                                                                                             | 23622248 |
| 40 | MCM3    | miR-93   | CLASH                                                                                                                             | 23622248 |
| 40 | WAC     | miR-93   | CLASH                                                                                                                             | 23622248 |
| 40 | TRIM28  | miR-93   | CLASH                                                                                                                             | 23622248 |
| 41 | SOD2    | miR-222  | Flow, Luciferase reporter assay, Microarray, qRT-PCR, Western blot                                                                | 19487542 |

|    |          |          |                                                                                                |          |
|----|----------|----------|------------------------------------------------------------------------------------------------|----------|
| 41 | DSE      | miR-21   | Microarray                                                                                     | 18591254 |
| 41 | AIM1     | miR-21   | Microarray                                                                                     | 18591254 |
| 41 | CCL20    | miR-21   | ELISA, Immunofluorescence, Luciferase reporter assay                                           | 22001440 |
| 41 | BIRC3    | miR-34a  | Microarray, Northern blot                                                                      | 17540599 |
| 41 | SLC39A14 | miR-9    | Microarray                                                                                     | 17612493 |
| 41 | SLC39A14 | miR-155  | Proteomics                                                                                     | 18668040 |
| 41 | MAFB     | miR-155  | Microarray                                                                                     | 19193853 |
| 41 | GLIPR1   | miR-155  | Proteomics                                                                                     | 18668040 |
| 41 | SLC2A5   | miR-9    | Microarray                                                                                     | 17612493 |
| 41 | PLAUR    | miR-155  | Proteomics                                                                                     | 18668040 |
| 41 | CEBPB    | miR-155  | Luciferase reporter assay                                                                      | 18367535 |
| 41 | CEBPB    | miR-155  | Microarray, qRT-PCR, Western blot                                                              | 19193853 |
| 41 | CEBPB    | miR-155  | Luciferase reporter assay, qRT-PCR, Western blot                                               | 20427544 |
| 41 | CEBPB    | miR-155  | pSILAC, Proteomics                                                                             | 18668040 |
| 41 | CEBPB    | miR-155  | Luciferase reporter assay                                                                      | 19596814 |
| 41 | CEBPB    | miR-155  | ELISA, Immunoblot, Immunocytochemistry, Immunofluorescence, Luciferase reporter assay, qRT-PCR | 19887047 |
| 41 | CEBPB    | miR-34a  | Luciferase reporter assay, Reporter assay                                                      | 20598588 |
| 41 | TLR2     | miR-19b  | Luciferase reporter assay, qRT-PCR, Western blot                                               | 22105995 |
| 41 | S100A11  | miR-155  | Proteomics                                                                                     | 18668040 |
| 41 | IL6      | miR-155  | Proteomics                                                                                     | 20584899 |
| 41 | IL6      | miR-155  | Proteomics                                                                                     | 18668040 |
| 41 | JUNB     | miR-155  | Proteomics                                                                                     | 18668040 |
| 41 | TGFBI    | miR-21   | Luciferase reporter assay, Western blot                                                        | 19136465 |
| 41 | TGFBI    | miR-21   | Microarray                                                                                     | 18591254 |
| 41 | TGFBI    | miR-9    | In situ hybridization, Luciferase reporter assay                                               | 21720722 |
| 41 | TNFAIP3  | miR-21   | Luciferase reporter assay                                                                      | 21131358 |
| 42 | PYGL     | miR-155  | Proteomics                                                                                     | 18668040 |
| 42 | ANXA2    | miR-155  | Proteomics                                                                                     | 18668040 |
| 42 | S100A11  | miR-155  | Proteomics                                                                                     | 18668040 |
| 42 | PLAUR    | miR-155  | Proteomics                                                                                     | 18668040 |
| 43 | BIRC5    | miR-93   | CLASH                                                                                          | 23622248 |
| 43 | CENPF    | miR-93   | CLASH                                                                                          | 23622248 |
| 43 | KIF23    | miR-106b | Microarray                                                                                     | 17242205 |
| 43 | KIF23    | miR-25   | CLASH                                                                                          | 23622248 |
| 43 | TYMS     | miR-18a  | CLASH                                                                                          | 23622248 |
| 43 | PCNA     | miR-18a  | CLASH                                                                                          | 23622248 |
| 43 | RNASEH2A | miR-25   | CLASH                                                                                          | 23622248 |
| 43 | GINS1    | miR-18a  | CLASH                                                                                          | 23622248 |
| 43 | MAD2L1   | miR-93   | CLASH                                                                                          | 23622248 |
| 43 | HN1      | miR-106b | Microarray                                                                                     | 17242205 |
| 43 | CDC20    | miR-93   | CLASH                                                                                          | 23622248 |
| 43 | CDC20    | miR-18a  | CLASH                                                                                          | 23622248 |
| 43 | KPNA2    | miR-93   | CLASH                                                                                          | 23622248 |
| 43 | EZH2     | miR-93   | CLASH                                                                                          | 23622248 |
| 43 | EZH2     | miR-25   | Luciferase reporter assay, qRT-PCR, Western blot                                               | 22399519 |
| 44 | ELAVL1   | miR-93   | CLASH                                                                                          | 23622248 |
| 44 | DHFR     | miR-93   | CLASH                                                                                          | 23622248 |
| 44 | ZNF76    | miR-93   | CLASH                                                                                          | 23622248 |
| 44 | MAD1L1   | miR-20a  | CLASH                                                                                          | 23622248 |
| 44 | ADRM1    | miR-93   | CLASH                                                                                          | 23622248 |
| 44 | DHX30    | miR-93   | CLASH                                                                                          | 23622248 |
| 44 | NONO     | miR-93   | CLASH                                                                                          | 23622248 |
| 46 | NASP     | miR-29a  | Luciferase reporter assay, Western blot                                                        | 22080513 |
| 46 | NASP     | miR-29a  | Luciferase reporter assay                                                                      | 22194605 |
| 46 | ZER1     | miR-19b  | Sequencing                                                                                     | 20371350 |
| 46 | SUZ12    | miR-19a  | Luciferase reporter assay                                                                      | 23451058 |
| 47 | CSNK2A1  | miR-22   | Sequencing                                                                                     | 20371350 |
| 47 | ABL1     | miR-29a  | Luciferase reporter assay                                                                      | 23428668 |

|    |          |          |                                                                                                |          |
|----|----------|----------|------------------------------------------------------------------------------------------------|----------|
| 48 | CAPG     | miR-34a  | Proteomics                                                                                     | 21566225 |
| 48 | FAH      | miR-34a  | Proteomics                                                                                     | 21566225 |
| 48 | CYBRD1   | miR-21   | Microarray                                                                                     | 18591254 |
| 48 | TRIM38   | miR-21   | Microarray                                                                                     | 18591254 |
| 48 | ANXA4    | miR-34a  | Proteomics                                                                                     | 21566225 |
| 48 | SERPINB1 | miR-34a  | Proteomics                                                                                     | 21566225 |
| 48 | LRP10    | miR-222  | CLASH                                                                                          | 23622248 |
| 48 | FAS      | miR-21   | Microarray                                                                                     | 20048743 |
| 48 | RRAS     | miR-34a  | Sequencing                                                                                     | 20371350 |
| 48 | LYN      | miR-222  | CLASH                                                                                          | 23622248 |
| 48 | LAMP2    | miR-21   | Microarray                                                                                     | 18591254 |
| 48 | CCR1     | miR-21   | Luciferase reporter assay                                                                      | 21131358 |
| 48 | S100A11  | miR-155  | Proteomics                                                                                     | 18668040 |
| 49 | SPI1     | miR-34a  | Luciferase reporter assay, Reporter assay                                                      | 20598588 |
| 49 | CCR1     | miR-21   | Luciferase reporter assay                                                                      | 21131358 |
| 50 | ANKRD46  | miR-21   | Immunoblot, Immunohistochemistry, Luciferase reporter assay, Microarray, qRT-PCR, Western blot | 21219636 |
| 50 | BMP7     | miR-22   | qRT-PCR, Luciferase reporter assay, Western blot                                               | 19011694 |
| 50 | GTF2I    | miR-21   | Microarray                                                                                     | 18591254 |
| 50 | ARHGEF7  | miR-20a  | CLASH                                                                                          | 23622248 |
| 50 | GRIA2    | miR-181b | Luciferase assay/RT-PCR, Reporter assay, Other                                                 | 18184693 |
| 50 | NOVA1    | miR-155  | Reporter assay, Other                                                                          | 20584899 |
| 50 | DBN1     | miR-222  | CLASH                                                                                          | 23622248 |
| 50 | DBN1     | miR-155  | Proteomics                                                                                     | 18668040 |
| 50 | TCL1A    | miR-181b | Luciferase reporter assay, Microarray, qRT-PCR, Western blot                                   | 17178851 |
| 50 | TRIM24   | miR-155  | Proteomics                                                                                     | 20584899 |
| 50 | REV3L    | miR-21   | Microarray                                                                                     | 18591254 |
| 50 | REV3L    | miR-93   | Sequencing                                                                                     | 20371350 |
| 50 | NKX2-2   | miR-9    | Microarray                                                                                     | 17612493 |
| 50 | APBB2    | miR-9    | Microarray                                                                                     | 17612493 |
| 50 | APBB2    | miR-93   | CLASH                                                                                          | 23622248 |
| 51 | SERPINB1 | miR-34a  | Proteomics                                                                                     | 21566225 |
| 51 | TLR2     | miR-19b  | Luciferase reporter assay, qRT-PCR, Western blot                                               | 22105995 |
| 51 | CCR1     | miR-21   | Luciferase reporter assay                                                                      | 21131358 |
| 51 | CEBPA    | miR-193a | CLASH                                                                                          | 23622248 |
| 51 | CORO1A   | miR-222  | Western blot                                                                                   | 21226887 |
| 51 | MAFB     | miR-155  | Microarray                                                                                     | 19193853 |
| 51 | LPXN     | miR-9    | Microarray                                                                                     | 17612493 |
| 51 | LYN      | miR-222  | CLASH                                                                                          | 23622248 |
| 51 | CAPG     | miR-34a  | Proteomics                                                                                     | 21566225 |
| 52 | PFN2     | miR-7    | Microarray, Microarray, Other                                                                  | 19073608 |
| 52 | UCHL1    | miR-181a | CLASH                                                                                          | 23622248 |
| 52 | HOXC6    | miR-27a  | Sequencing                                                                                     | 20371350 |
| 52 | SPTBN2   | miR-222  | CLASH                                                                                          | 23622248 |
| 52 | HIST1H1C | miR-34a  | Proteomics                                                                                     | 21566225 |
| 52 | INA      | miR-155  | Proteomics                                                                                     | 18668040 |
| 52 | MYT1     | miR-27a  | Western blot, Luciferase reporter assay                                                        | 18006846 |
| 52 | MAG11    | miR-34a  | Sequencing                                                                                     | 20371350 |
| 52 | RAP2A    | miR-34a  | CLASH                                                                                          | 23622248 |
| 52 | TFAP2A   | miR-221  | Sequencing                                                                                     | 20371350 |
| 52 | NOL4     | miR-181a | Microarray                                                                                     | 17612493 |
| 52 | CLIC1    | miR-221  | CLASH                                                                                          | 23622248 |
| 53 | KIF1B    | miR-9    | Microarray                                                                                     | 17612493 |
| 53 | NKX2-2   | miR-9    | Microarray                                                                                     | 17612493 |
| 54 | TNFSF10  | miR-222  | Western blot                                                                                   | 18246122 |
| 54 | GATA6    | miR-181a | Luciferase reporter assay                                                                      | 19585654 |
| 54 | GATA6    | miR-181a | Microarray                                                                                     | 17612493 |
| 54 | TGM2     | miR-155  | Proteomics                                                                                     | 18668040 |
| 54 | TGFBR2   | miR-21   | qRT-PCR, Western blot                                                                          | 19906824 |

|    |        |        |                                                                  |          |
|----|--------|--------|------------------------------------------------------------------|----------|
| 54 | TGFBR2 | miR-21 | qRT-PCR, Luciferase reporter assay, Western blot, Reporter assay | 19816956 |
| 54 | TGFBR2 | miR-21 | Luciferase reporter assay, qRT-PCR, Western blot                 | 18829576 |
| 54 | TGFBR2 | miR-21 | Luciferase reporter assay, Western blot                          | 22072622 |
| 54 | TGFBR2 | miR-21 | Microarray                                                       | 18591254 |
| 33 | KPNA2  | miR-16 | Proteomics                                                       | 18668040 |
