# Supplementary material for: A Computational Approach to Identifying Gene-microRNA Modules in Cancer
Source: PubMed Central journal article supplement (PMC4303261; doi:10.1371/journal.pcbi.1004042), 2015-01-22
Supplement: pcbi.1004042.s021.pdf [file pcbi.1004042.s021.pdf]

Table S14. Ovarian cancer modules with enriched GO terms.

| Module ID | m   | k  | x  | Gene Ontology                             | p-value  | Genes                                                                                                         | p-value  |
|-----------|-----|----|----|-------------------------------------------|----------|---------------------------------------------------------------------------------------------------------------|----------|
| 2         | 69  | 60 | 5  | Hemopoiesis                               | 2.28E-05 | MMP9, BLNK, CD4, LCK, LYN                                                                                     | 2.09E-03 |
| 2         | 74  | 60 | 5  | Immune System Development                 | 3.21E-05 | MMP9, BLNK, CD4, LCK, LYN                                                                                     | 2.27E-03 |
| 2         | 233 | 60 | 8  | Defense Response                          | 1.87E-05 | CXCL11, CXCL9, BLNK, CXCL10, CLEC5A, LSP1, CCR5, TYROBP                                                       | 1.93E-03 |
| 2         | 128 | 60 | 8  | Behavior                                  | 2.11E-07 | CXCL13, CXCL11, CXCL9, CXCL10, DOCK2, CCR5, ITGB2, PLAUR                                                      | 4.34E-05 |
| 2         | 80  | 60 | 8  | Locomotory Behavior                       | 5.14E-09 | CXCL13, CXCL11, CXCL9, CXCL10, DOCK2, CCR5, ITGB2, PLAUR                                                      | 1.41E-06 |
| 2         | 34  | 60 | 3  | Leukocyte Differentiation                 | 6.30E-04 | MMP9, CD4, LCK                                                                                                | 2.78E-02 |
| 2         | 113 | 60 | 5  | Inflammatory Response                     | 2.41E-04 | CXCL11, CXCL9, BLNK, CXCL10, CCR5                                                                             | 1.33E-02 |
| 2         | 261 | 60 | 10 | Response To Chemical Stimulus             | 5.59E-07 | CXCL13, CXCL11, CXCL9, CXCL10, DOCK2, CCR5, ITGB2, PLAUR, LCK, LYN                                            | 9.23E-05 |
| 2         | 207 | 60 | 11 | Immune Response                           | 4.87E-09 | CXCL13, IL18, BLNK, CD96, POU2AF1, AIM2, PSMB10, LCP2, CCR5, ARHGDIB, CD74                                    | 1.41E-06 |
| 2         | 71  | 60 | 5  | Hemopoietic Or Lymphoid Organ Development | 2.62E-05 | MMP9, BLNK, CD4, LCK, LYN                                                                                     | 2.16E-03 |
| 2         | 290 | 60 | 17 | Immune System Process                     | 8.52E-14 | CXCL13, MMP9, IL18, BLNK, CD96, POU2AF1, AIM2, PSMB10, LCP2, DOCK2, CCR5, ITGB2, ARHGDIB, CD4, CD74, LCK, LYN | 7.03E-11 |
| 2         | 39  | 60 | 3  | T Cell Activation                         | 9.46E-04 | IL18, CD4, LCK                                                                                                | 3.49E-02 |
| 2         | 269 | 60 | 9  | Response To External Stimulus             | 6.61E-06 | CXCL13, CXCL11, CXCL9, BLNK, CXCL10, DOCK2, CCR5, ITGB2, PLAUR                                                | 7.79E-04 |
| 2         | 226 | 60 | 6  | Protein Amino Acid Phosphorylation        | 8.79E-04 | HCK, ITGB2, BTK, LCK, LYN, FGR                                                                                | 3.45E-02 |
| 2         | 168 | 60 | 5  | Response To Wounding                      | 1.46E-03 | CXCL11, CXCL9, BLNK, CXCL10, CCR5                                                                             | 4.65E-02 |
| 2         | 29  | 60 | 3  | Humoral Immune Response                   | 3.92E-04 | BLNK, POU2AF1, PSMB10                                                                                         | 1.90E-02 |
| 2         | 253 | 60 | 6  | Phosphorylation                           | 1.57E-03 | HCK, ITGB2, BTK, LCK, LYN, FGR                                                                                | 4.80E-02 |
| 2         | 52  | 60 | 5  | Cellular Defense Response                 | 5.63E-06 | CXCL9, CLEC5A, LSP1, CCR5, TYROBP                                                                             | 7.74E-04 |
| 3         | 170 | 35 | 8  | Cell Cycle Process                        | 2.28E-08 | PLK1, E2F1, KIF22, CDC6, TUBG1, PRC1, BUB1, CDK2                                                              | 9.39E-06 |
| 3         | 134 | 35 | 7  | Mitotic Cell Cycle                        | 9.36E-08 | PLK1, E2F1, KIF22, CDC6, PRC1, BUB1, CDK2                                                                     | 2.57E-05 |
| 3         | 153 | 35 | 6  | Cell Cycle Phase                          | 4.57E-06 | PLK1, E2F1, KIF22, CDC6, BUB1, CDK2                                                                           | 9.42E-04 |
| 3         | 43  | 35 | 3  | Cell Cycle Checkpoint Go 000075           | 2.56E-04 | CCNE2, CDC6, BUB1                                                                                             | 2.64E-02 |
| 3         | 13  | 35 | 3  | G1 Phase Of Mitotic Cell Cycle            | 6.31E-06 | E2F1, CDC6, CDK2                                                                                              | 1.04E-03 |
| 3         | 93  | 35 | 4  | Dna Replication                           | 1.45E-04 | MCM2, CDC6, CDK2, MCM7                                                                                        | 1.71E-02 |
| 3         | 15  | 35 | 3  | G1 Phase                                  | 9.99E-06 | E2F1, CDC6, CDK2                                                                                              | 1.37E-03 |
| 3         | 276 | 35 | 10 | Cell Cycle Go 0007049                     | 3.76E-09 | CCNE2, PLK1, MCM2, E2F1, KIF22, CDC6, TUBG1, PRC1, BUB1, CDK2                                                 | 3.11E-06 |

|    |     |    |    |                                                        |          |                                                                                                          |          |
|----|-----|----|----|--------------------------------------------------------|----------|----------------------------------------------------------------------------------------------------------|----------|
| 3  | 57  | 35 | 3  | Interphase Of Mitotic Cell Cycle                       | 5.91E-04 | E2F1, CDC6, CDK2                                                                                         | 4.88E-02 |
| 6  | 234 | 34 | 7  | Dna Metabolic Process                                  | 3.29E-06 | CHEK1, POLE2, CDK2, PRIM1, FEN1, MCM2, MSH6                                                              | 3.88E-04 |
| 6  | 134 | 34 | 4  | Regulation Of Kinase Activity                          | 5.25E-04 | CHEK1, CCNE2, CDC25A, CDKN3                                                                              | 2.69E-02 |
| 6  | 133 | 34 | 4  | Regulation Of Protein Kinase Activity                  | 5.10E-04 | CHEK1, CCNE2, CDC25A, CDKN3                                                                              | 2.69E-02 |
| 6  | 99  | 34 | 4  | M Phase                                                | 1.65E-04 | CHEK1, KIF15, KNTC1, BUB1                                                                                | 1.13E-02 |
| 6  | 136 | 34 | 4  | Regulation Of Transferase Activity                     | 5.55E-04 | CHEK1, CCNE2, CDC25A, CDKN3                                                                              | 2.69E-02 |
| 6  | 63  | 34 | 4  | Interphase                                             | 2.80E-05 | CDC7, TIMELESS, CDK2, CDKN3                                                                              | 2.10E-03 |
| 6  | 170 | 34 | 10 | Cell Cycle Process                                     | 2.36E-11 | CHEK1, CDC7, TIMELESS, CDK2, KIF15, KNTC1, KIF23, BUB1, RACGAP1, CDKN3                                   | 9.74E-09 |
| 6  | 134 | 34 | 7  | Mitotic Cell Cycle                                     | 7.56E-08 | CDC7, CDK2, KIF15, KNTC1, KIF23, BUB1, CDKN3                                                             | 1.04E-05 |
| 6  | 153 | 34 | 8  | Cell Cycle Phase                                       | 7.76E-09 | CHEK1, CDC7, TIMELESS, CDK2, KIF15, KNTC1, BUB1, CDKN3                                                   | 1.60E-06 |
| 6  | 43  | 34 | 4  | Cell Cycle Checkpoint Go 0000075                       | 6.05E-06 | CHEK1, CCNE2, KNTC1, BUB1                                                                                | 4.99E-04 |
| 6  | 93  | 34 | 5  | Dna Replication                                        | 5.75E-06 | POLE2, CDK2, PRIM1, MCM2, MSH6                                                                           | 4.99E-04 |
| 6  | 39  | 34 | 4  | Regulation Of Cyclin Dependent Protein Kinase Activity | 4.06E-06 | CHEK1, CCNE2, CDC25A, CDKN3                                                                              | 4.19E-04 |
| 6  | 70  | 34 | 3  | Mitosis                                                | 9.89E-04 | KIF15, KNTC1, BUB1                                                                                       | 3.89E-02 |
| 6  | 276 | 34 | 13 | Cell Cycle Go 0007049                                  | 2.13E-13 | CHEK1, CDC7, CCNE2, TIMELESS, CDK2, KIF15, KNTC1, CDC25A, MCM2, KIF23, BUB1, RACGAP1, CDKN3              | 1.75E-10 |
| 6  | 51  | 34 | 3  | Dna Dependent Dna Replication                          | 3.90E-04 | CDK2, PRIM1, MSH6                                                                                        | 2.48E-02 |
| 6  | 57  | 34 | 3  | Interphase Of Mitotic Cell Cycle                       | 5.42E-04 | CDC7, CDK2, CDKN3                                                                                        | 2.69E-02 |
| 6  | 150 | 34 | 4  | Response To Dna Damage Stimulus                        | 8.02E-04 | CHEK1, POLE2, FEN1, MSH6                                                                                 | 3.44E-02 |
| 6  | 157 | 34 | 9  | Regulation Of Cell Cycle                               | 3.43E-10 | CHEK1, CDC7, CCNE2, TIMELESS, CDK2, KNTC1, CDC25A, BUB1, CDKN3                                           | 9.44E-08 |
| 6  | 72  | 34 | 3  | M Phase Of Mitotic Cell Cycle                          | 1.07E-03 | KIF15, KNTC1, BUB1                                                                                       | 4.03E-02 |
| 6  | 266 | 34 | 5  | Regulation Of Cell Proliferation                       | 8.34E-04 | CHEK1, CDC7, TIMELESS, CDK2, CDKN3                                                                       | 3.44E-02 |
| 13 | 234 | 78 | 16 | Dna Metabolic Process                                  | 1.47E-12 | CDC6, EXO1, RAD1, POLE2, MCM7, SMARCB1, POLL, ORC2L, FANCG, DBF4, CHEK1, CEBPG, ORC5L, TFAM, ORC1L, GMNN | 1.21E-09 |
| 13 | 118 | 78 | 6  | Dna Repair                                             | 1.13E-04 | EXO1, RAD1, POLE2, POLL, FANCG, CEBPG                                                                    | 5.47E-03 |
| 13 | 177 | 78 | 8  | Response To Endogenous Stimulus                        | 1.82E-05 | EXO1, RAD1, POLE2, MCM7, POLL, FANCG, CHEK1, CEBPG                                                       | 1.25E-03 |

|    |     |    |    |                                  |          |                                                                                       |          |
|----|-----|----|----|----------------------------------|----------|---------------------------------------------------------------------------------------|----------|
| 13 | 99  | 78 | 7  | M Phase                          | 3.36E-06 | BUB1, NCAPH, RAD1, PLK1, BIRC5, CHEK1, SMC4                                           | 2.77E-04 |
| 13 | 20  | 78 | 3  | Dna Integrity Checkpoint         | 2.75E-04 | CDC6, RAD1, CHEK1                                                                     | 1.26E-02 |
| 13 | 63  | 78 | 4  | Interphase                       | 7.26E-04 | CDC6, BIRC5, DBF4, TIMELESS                                                           | 3.13E-02 |
| 13 | 170 | 78 | 10 | Cell Cycle Process               | 1.33E-07 | BUB1, NCAPH, CDC6, RAD1, PLK1, BIRC5, DBF4, CHEK1, TIMELESS, SMC4                     | 1.56E-05 |
| 13 | 134 | 78 | 7  | Mitotic Cell Cycle               | 2.47E-05 | BUB1, NCAPH, CDC6, PLK1, BIRC5, DBF4, SMC4                                            | 1.57E-03 |
| 13 | 153 | 78 | 10 | Cell Cycle Phase                 | 4.90E-08 | BUB1, NCAPH, CDC6, RAD1, PLK1, BIRC5, DBF4, CHEK1, TIMELESS, SMC4                     | 6.74E-06 |
| 13 | 43  | 78 | 7  | Cell Cycle Checkpoint Go 0000075 | 9.72E-09 | BUB1, CCNE2, CDC6, RAD1, FANCG, BIRC5, CHEK1                                          | 2.67E-06 |
| 13 | 15  | 78 | 4  | Dna Replication Initiation       | 2.11E-06 | CDC6, ORC2L, ORC5L, ORC1L                                                             | 1.93E-04 |
| 13 | 93  | 78 | 10 | Dna Replication                  | 3.76E-10 | CDC6, EXO1, POLE2, MCM7, ORC2L, DBF4, ORC5L, TFAM, ORC1L, GMNN                        | 1.55E-07 |
| 13 | 70  | 78 | 5  | Mitosis                          | 8.73E-05 | BUB1, NCAPH, PLK1, BIRC5, SMC4                                                        | 4.80E-03 |
| 13 | 276 | 78 | 13 | Cell Cycle Go 0007049            | 2.12E-08 | BUB1, CCNE2, NCAPH, CDC6, RAD1, FANCG, PLK1, BIRC5, DBF4, CHEK1, TIMELESS, SMC4, GMNN | 4.37E-06 |
| 13 | 51  | 78 | 7  | Dna Dependent Dna Replication    | 3.35E-08 | CDC6, EXO1, ORC2L, ORC5L, TFAM, ORC1L, GMNN                                           | 5.53E-06 |
| 13 | 150 | 78 | 8  | Response To Dna Damage Stimulus  | 5.39E-06 | EXO1, RAD1, POLE2, MCM7, POLL, FANCG, CHEK1, CEBPG                                    | 4.05E-04 |
| 13 | 157 | 78 | 9  | Regulation Of Cell Cycle         | 7.32E-07 | BUB1, CCNE2, CDC6, RAD1, FANCG, BIRC5, CHEK1, TIMELESS, GMNN                          | 7.55E-05 |
| 13 | 72  | 78 | 5  | M Phase Of Mitotic Cell Cycle    | 9.99E-05 | BUB1, NCAPH, PLK1, BIRC5, SMC4                                                        | 5.15E-03 |
| 18 | 234 | 31 | 9  | Dna Metabolic Process            | 4.71E-09 | CHEK1, MCM3, DMC1, NASP, MCM2, FEN1, EXO1, MCM7, FANCG                                | 1.94E-06 |
| 18 | 177 | 31 | 5  | Response To Endogenous Stimulus  | 8.08E-05 | CHEK1, FEN1, EXO1, MCM7, FANCG                                                        | 6.67E-03 |
| 18 | 99  | 31 | 4  | M Phase                          | 1.14E-04 | CHEK1, KNTC1, DMC1, SMC4                                                              | 8.55E-03 |
| 18 | 170 | 31 | 8  | Cell Cycle Process               | 8.00E-09 | CHEK1, KNTC1, DMC1, TIMELESS, SMC4, KIF23, RACGAP1, CDC7                              | 2.20E-06 |
| 18 | 134 | 31 | 4  | Mitotic Cell Cycle               | 3.65E-04 | KNTC1, SMC4, KIF23, CDC7                                                              | 2.15E-02 |
| 18 | 153 | 31 | 6  | Cell Cycle Phase                 | 2.16E-06 | CHEK1, KNTC1, DMC1, TIMELESS, SMC4, CDC7                                              | 3.45E-04 |
| 18 | 43  | 31 | 4  | Cell Cycle Checkpoint Go 0000075 | 4.13E-06 | CHEK1, CCNE2, KNTC1, FANCG                                                            | 4.26E-04 |
| 18 | 77  | 31 | 3  | Response To Abiotic Stimulus     | 9.93E-04 | TIMELESS, FEN1, TOPBP1                                                                | 4.55E-02 |
| 18 | 93  | 31 | 5  | Dna Replication                  | 3.57E-06 | MCM3, NASP, MCM2, EXO1, MCM7                                                          | 4.21E-04 |
| 18 | 44  | 31 | 3  | Dna Recombination                | 1.90E-04 | CHEK1, DMC1, EXO1                                                                     | 1.21E-02 |

|    |     |    |    |                                  |          |                                                                                                         |          |
|----|-----|----|----|----------------------------------|----------|---------------------------------------------------------------------------------------------------------|----------|
| 18 | 276 | 31 | 12 | Cell Cycle Go 0007049            | 1.56E-12 | CHEK1, CCNE2, KNTC1, DMC1, NASP, MCM2, TIMELESS, SMC4, KIF23, RACGAP1, FANCG, CDC7                      | 1.29E-09 |
| 18 | 150 | 31 | 5  | Response To Dna Damage Stimulus  | 3.67E-05 | CHEK1, FEN1, EXO1, MCM7, FANCG                                                                          | 3.36E-03 |
| 18 | 157 | 31 | 6  | Regulation Of Cell Cycle         | 2.51E-06 | CHEK1, CCNE2, KNTC1, TIMELESS, FANCG, CDC7                                                              | 3.45E-04 |
| 20 | 118 | 44 | 4  | Dna Repair                       | 8.79E-04 | POLQ, EXO1, RAD51, HMGB2                                                                                | 4.27E-02 |
| 20 | 19  | 44 | 4  | Mitotic Cell Cycle Checkpoint    | 5.77E-07 | BUB1, CCNA2, MAD2L1, BUB1B                                                                              | 4.76E-05 |
| 20 | 177 | 44 | 5  | Response To Endogenous Stimulus  | 4.43E-04 | POLQ, EXO1, CCNA2, RAD51, HMGB2                                                                         | 2.43E-02 |
| 20 | 99  | 44 | 12 | M Phase                          | 1.11E-16 | BUB1, PLK1, CENPE, CCNA2, RAD51, MAD2L1, NEK2, BIRC5, NCAPH, BUB1B, KIF15, AURKA                        | 9.16E-14 |
| 20 | 33  | 44 | 6  | Regulation Of Mitosis            | 1.72E-09 | BUB1, CCNA2, MAD2L1, NEK2, BIRC5, BUB1B                                                                 | 1.77E-07 |
| 20 | 170 | 44 | 14 | Cell Cycle Process               | 5.08E-14 | BUB1, PLK1, CENPE, CCNA2, RAD51, MAD2L1, NEK2, BIRC5, NCAPH, BUB1B, KIF23, KIF15, RACGAP1, AURKA        | 8.01E-12 |
| 20 | 134 | 44 | 12 | Mitotic Cell Cycle               | 4.67E-14 | BUB1, PLK1, CENPE, CCNA2, MAD2L1, NEK2, BIRC5, NCAPH, BUB1B, KIF23, KIF15, AURKA                        | 8.01E-12 |
| 20 | 153 | 44 | 12 | Cell Cycle Phase                 | 1.90E-13 | BUB1, PLK1, CENPE, CCNA2, RAD51, MAD2L1, NEK2, BIRC5, NCAPH, BUB1B, KIF15, AURKA                        | 2.23E-11 |
| 20 | 43  | 44 | 5  | Cell Cycle Checkpoint Go 0000075 | 4.47E-07 | BUB1, CCNA2, MAD2L1, BIRC5, BUB1B                                                                       | 4.10E-05 |
| 20 | 28  | 44 | 3  | Chromosome Segregation           | 1.40E-04 | CENPE, NCAPH, TOP2A                                                                                     | 9.62E-03 |
| 20 | 70  | 44 | 11 | Mitosis                          | 2.09E-14 | BUB1, PLK1, CENPE, CCNA2, MAD2L1, NEK2, BIRC5, NCAPH, BUB1B, KIF15, AURKA                               | 8.01E-12 |
| 20 | 276 | 44 | 15 | Cell Cycle Go 0007049            | 5.83E-14 | BUB1, PLK1, CENPE, CCNA2, RAD51, MAD2L1, NEK2, BIRC5, NCAPH, BUB1B, KIF23, KIF15, CDC20, RACGAP1, AURKA | 8.01E-12 |
| 20 | 51  | 44 | 3  | Dna Dependent Dna Replication    | 8.39E-04 | EXO1, RAD51, HMGB2                                                                                      | 4.27E-02 |
| 20 | 150 | 44 | 5  | Response To Dna Damage Stimulus  | 2.06E-04 | POLQ, EXO1, CCNA2, RAD51, HMGB2                                                                         | 1.31E-02 |
| 20 | 157 | 44 | 6  | Regulation Of Cell Cycle         | 2.09E-05 | BUB1, CCNA2, MAD2L1, NEK2, BIRC5, BUB1B                                                                 | 1.57E-03 |
| 20 | 72  | 44 | 11 | M Phase Of Mitotic Cell Cycle    | 3.64E-14 | BUB1, PLK1, CENPE, CCNA2, MAD2L1, NEK2, BIRC5, NCAPH, BUB1B, KIF15, AURKA                               | 8.01E-12 |
| 21 | 233 | 30 | 7  | Defense Response                 | 1.29E-06 | CXCL11, CXCL9, CCR5, PT-PRCAP, ITK, MNDA, CCR1                                                          | 2.94E-04 |
| 21 | 128 | 30 | 5  | Behavior                         | 1.44E-05 | CXCL13, CXCL11, CXCL9, CCR5, DOCK2                                                                      | 1.72E-03 |

|    |     |    |    |                                          |          |                                                                                                   |          |
|----|-----|----|----|------------------------------------------|----------|---------------------------------------------------------------------------------------------------|----------|
| 21 | 80  | 30 | 5  | Locomotory Behavior                      | 1.43E-06 | CXCL13, CXCL11, CXCL9, CCR5, DOCK2                                                                | 2.94E-04 |
| 21 | 113 | 30 | 4  | Inflammatory Response                    | 1.67E-04 | CXCL11, CXCL9, CCR5, CCR1                                                                         | 1.05E-02 |
| 21 | 88  | 30 | 4  | Cellular Cation Homeostasis              | 6.31E-05 | CXCL13, CCR5, LCK, CCR1                                                                           | 5.21E-03 |
| 21 | 261 | 30 | 6  | Response To Chemical Stimulus            | 3.75E-05 | CXCL13, CXCL11, CXCL9, CCR5, LCK, DOCK2                                                           | 3.87E-03 |
| 21 | 207 | 30 | 8  | Immune Response                          | 2.82E-08 | CXCL13, CD96, AIM2, CCR5, IL2RG, GZMA, LCP2, CCR1                                                 | 1.16E-05 |
| 21 | 172 | 30 | 4  | Homeostatic Process                      | 8.24E-04 | CXCL13, CCR5, LCK, CCR1                                                                           | 3.09E-02 |
| 21 | 115 | 30 | 4  | Cellular Homeostasis                     | 1.79E-04 | CXCL13, CCR5, LCK, CCR1                                                                           | 1.05E-02 |
| 21 | 290 | 30 | 10 | Immune System Process                    | 1.10E-09 | CXCL13, CD96, AIM2, CCR5, IL2RG, GZMA, LCP2, LCK, CCR1, DOCK2                                     | 9.10E-07 |
| 21 | 269 | 30 | 6  | Response To External Stimulus            | 4.44E-05 | CXCL13, CXCL11, CXCL9, CCR5, CCR1, DOCK2                                                          | 4.07E-03 |
| 21 | 130 | 30 | 4  | Chemical Homeostasis                     | 2.86E-04 | CXCL13, CCR5, LCK, CCR1                                                                           | 1.42E-02 |
| 21 | 107 | 30 | 4  | Ion Homeostasis                          | 1.35E-04 | CXCL13, CCR5, LCK, CCR1                                                                           | 9.29E-03 |
| 21 | 55  | 30 | 3  | Apoptotic Program                        | 3.35E-04 | GZMA, GZMB, LCK                                                                                   | 1.46E-02 |
| 21 | 91  | 30 | 4  | Cation Homeostasis                       | 7.20E-05 | CXCL13, CCR5, LCK, CCR1                                                                           | 5.40E-03 |
| 21 | 168 | 30 | 4  | Response To Wounding                     | 7.55E-04 | CXCL11, CXCL9, CCR5, CCR1                                                                         | 3.09E-02 |
| 21 | 52  | 30 | 4  | Cellular Defense Response                | 7.80E-06 | CXCL9, CCR5, ITK, MND4                                                                            | 1.29E-03 |
| 22 | 163 | 27 | 5  | Proteolysis                              | 2.71E-05 | MMP11, MMP1, CTSK, PLAU, MMP2                                                                     | 2.24E-02 |
| 25 | 234 | 29 | 8  | Dna Metabolic Process                    | 5.44E-08 | CHEK1, POLE2, MCM2, TIPIN, FEN1, MCM7, KPNA2, EXO1                                                | 8.98E-06 |
| 25 | 177 | 29 | 5  | Response To Endogenous Stimulus          | 5.78E-05 | CHEK1, POLE2, FEN1, MCM7, EXO1                                                                    | 3.41E-03 |
| 25 | 99  | 29 | 5  | M Phase                                  | 3.44E-06 | CHEK1, KIF15, SMC4, KPNA2, NDC80                                                                  | 3.24E-04 |
| 25 | 74  | 29 | 4  | Microtubule Based Process                | 2.78E-05 | KIF4A, KPNA2, PRC1, KIF23                                                                         | 1.91E-03 |
| 25 | 63  | 29 | 4  | Interphase                               | 1.46E-05 | CDC7, TIPIN, KPNA2, TIMELESS                                                                      | 1.21E-03 |
| 25 | 170 | 29 | 12 | Cell Cycle Process                       | 2.00E-15 | CHEK1, FBXO5, CDC7, TIPIN, KIF15, SMC4, KPNA2, TIMELESS, PRC1, RACGAP1, KIF23, NDC80              | 8.24E-13 |
| 25 | 134 | 29 | 8  | Mitotic Cell Cycle                       | 6.72E-10 | FBXO5, CDC7, KIF15, SMC4, KPNA2, PRC1, KIF23, NDC80                                               | 1.85E-07 |
| 25 | 153 | 29 | 8  | Cell Cycle Phase                         | 1.93E-09 | CHEK1, CDC7, TIPIN, KIF15, SMC4, KPNA2, TIMELESS, NDC80                                           | 3.99E-07 |
| 25 | 13  | 29 | 3  | S Phase                                  | 3.53E-06 | CDC7, TIPIN, TIMELESS                                                                             | 3.24E-04 |
| 25 | 43  | 29 | 3  | Cell Cycle Checkpoint Go 0000075         | 1.45E-04 | CHEK1, CCNE2, TIPIN                                                                               | 6.76E-03 |
| 25 | 93  | 29 | 5  | Dna Replication                          | 2.53E-06 | POLE2, MCM2, TIPIN, MCM7, EXO1                                                                    | 2.98E-04 |
| 25 | 44  | 29 | 3  | Dna Recombination                        | 1.56E-04 | CHEK1, KPNA2, EXO1                                                                                | 6.76E-03 |
| 25 | 70  | 29 | 3  | Mitosis                                  | 6.17E-04 | KIF15, SMC4, NDC80                                                                                | 2.12E-02 |
| 25 | 276 | 29 | 14 | Cell Cycle Go 0007049                    | 4.44E-16 | CHEK1, FBXO5, CDC7, CCNE2, MCM2, TIPIN, KIF15, SMC4, KPNA2, TIMELESS, PRC1, RACGAP1, KIF23, NDC80 | 3.66E-13 |
| 25 | 181 | 29 | 5  | Cytoskeleton Organization And Biogenesis | 6.43E-05 | KIF4A, KPNA2, PRC1, RACGAP1, KIF23                                                                | 3.54E-03 |

|    |     |    |    |                                   |          |                                                                            |          |
|----|-----|----|----|-----------------------------------|----------|----------------------------------------------------------------------------|----------|
| 25 | 150 | 29 | 5  | Response To Dna Damage Stimulus   | 2.62E-05 | CHEK1, POLE2, FEN1, MCM7, EXO1                                             | 1.91E-03 |
| 25 | 157 | 29 | 6  | Regulation Of Cell Cycle          | 1.65E-06 | CHEK1, FBXO5, CDC7, CCNE2, TIPIN, TIMELESS                                 | 2.27E-04 |
| 25 | 72  | 29 | 3  | M Phase Of Mitotic Cell Cycle     | 6.70E-04 | KIF15, SMC4, NDC80                                                         | 2.13E-02 |
| 26 | 234 | 44 | 8  | Dna Metabolic Process             | 1.75E-06 | FEN1, KPNA2, CHEK1, RPA3, XRCC4, GMNN, RAN, RFC4                           | 2.06E-04 |
| 26 | 99  | 44 | 7  | M Phase                           | 6.12E-08 | PLK1, BIRC5, CCNA2, MAD2L1, KPNA2, CHEK1, RAN                              | 1.01E-05 |
| 26 | 33  | 44 | 3  | Regulation Of Mitosis             | 2.30E-04 | BIRC5, CCNA2, MAD2L1                                                       | 1.58E-02 |
| 26 | 63  | 44 | 4  | Interphase                        | 7.89E-05 | BIRC5, TIMELESS, KPNA2, CDC7                                               | 5.92E-03 |
| 26 | 170 | 44 | 10 | Cell Cycle Process                | 3.96E-10 | FBXO5, PLK1, BIRC5, CCNA2, MAD2L1, TIMELESS, KPNA2, CHEK1, RAN, CDC7       | 3.26E-07 |
| 26 | 134 | 44 | 8  | Mitotic Cell Cycle                | 2.41E-08 | FBXO5, PLK1, BIRC5, CCNA2, MAD2L1, KPNA2, RAN, CDC7                        | 4.97E-06 |
| 26 | 153 | 44 | 9  | Cell Cycle Phase                  | 3.31E-09 | PLK1, BIRC5, CCNA2, MAD2L1, TIMELESS, KPNA2, CHEK1, RAN, CDC7              | 9.09E-07 |
| 26 | 43  | 44 | 4  | Cell Cycle Checkpoint Go 0000075  | 1.72E-05 | BIRC5, CCNA2, MAD2L1, CHEK1                                                | 1.42E-03 |
| 26 | 70  | 44 | 5  | Mitosis                           | 5.23E-06 | PLK1, BIRC5, CCNA2, MAD2L1, RAN                                            | 5.39E-04 |
| 26 | 276 | 44 | 11 | Cell Cycle Go 0007049             | 2.95E-09 | FBXO5, PLK1, BIRC5, CCNA2, MAD2L1, TIMELESS, KPNA2, CHEK1, GMNN, RAN, CDC7 | 9.09E-07 |
| 26 | 157 | 44 | 8  | Regulation Of Cell Cycle          | 8.31E-08 | FBXO5, BIRC5, CCNA2, MAD2L1, TIMELESS, CHEK1, GMNN, CDC7                   | 1.14E-05 |
| 26 | 72  | 44 | 5  | M Phase Of Mitotic Cell Cycle     | 6.01E-06 | PLK1, BIRC5, CCNA2, MAD2L1, RAN                                            | 5.51E-04 |
| 27 | 90  | 55 | 8  | Skeletal Development              | 6.48E-09 | COL11A1, INHBA, TWIST1, COMP, FBN1, SPARC, AEBP1, COL1A2                   | 1.78E-06 |
| 31 | 26  | 65 | 3  | Jak Stat Cascade                  | 3.57E-04 | STAT1, STAT3, LYN                                                          | 4.21E-02 |
| 31 | 128 | 65 | 6  | Behavior                          | 6.34E-05 | CXCL10, CXCL11, PTAFR, ITGB2, CCL5, CXCL9                                  | 1.74E-02 |
| 31 | 80  | 65 | 6  | Locomotory Behavior               | 4.30E-06 | CXCL10, CXCL11, PTAFR, ITGB2, CCL5, CXCL9                                  | 3.12E-03 |
| 31 | 113 | 65 | 5  | Inflammatory Response             | 3.51E-04 | CXCL10, CXCL11, PTAFR, CCL5, CXCL9                                         | 4.21E-02 |
| 31 | 22  | 65 | 3  | Peptidyl Tyrosine Phosphorylation | 2.15E-04 | STAT1, ITGB2, LYN                                                          | 3.54E-02 |
| 31 | 47  | 65 | 4  | Peptidyl Amino Acid Modification  | 1.16E-04 | STAT1, TPST2, ITGB2, LYN                                                   | 2.39E-02 |
| 31 | 24  | 65 | 4  | Peptidyl Tyrosine Modification    | 7.57E-06 | STAT1, TPST2, ITGB2, LYN                                                   | 3.12E-03 |
| 33 | 19  | 57 | 4  | Mitotic Cell Cycle Checkpoint     | 1.66E-06 | BUB1, TTK, BUB1B, CCNA2                                                    | 6.25E-05 |
| 33 | 13  | 57 | 4  | Cytokinesis                       | 3.12E-07 | RACGAP1, PRC1, NUSAP1, BIRC5                                               | 1.36E-05 |

|    |     |    |    |                                                      |          |                                                                                                                                                                           |          |
|----|-----|----|----|------------------------------------------------------|----------|---------------------------------------------------------------------------------------------------------------------------------------------------------------------------|----------|
| 33 | 99  | 57 | 18 | M Phase                                              | 3.18E-14 | BUB1, TTK, ESPL1, PLK1, NDC80, AURKA, KIF11, SMC4, TPX2, BUB1B, KIF15, UBE2C, NUSAP1, CCNA2, RAD54L, NCAPH, BIRC5, KPNA2                                                  | 5.24E-12 |
| 33 | 74  | 57 | 7  | Microtubule Based Process                            | 5.12E-08 | TTK, KIF11, KIF23, PRC1, NUSAP1, KIF4A, KPNA2                                                                                                                             | 2.64E-06 |
| 33 | 33  | 57 | 7  | Regulation Of Mitosis                                | 1.41E-10 | BUB1, TTK, BUB1B, UBE2C, NUSAP1, CCNA2, BIRC5                                                                                                                             | 1.30E-08 |
| 33 | 31  | 57 | 5  | Microtubule Cytoskeleton Organization And Biogenesis | 3.07E-07 | TTK, KIF11, KIF23, PRC1, NUSAP1                                                                                                                                           | 1.36E-05 |
| 33 | 170 | 57 | 23 | Cell Cycle Process                                   | 5.44E-14 | BUB1, FBXO5, TTK, ESPL1, PLK1, NDC80, AURKA, RACGAP1, KIF11, KIF23, SMC4, PRC1, TPX2, BUB1B, KIF15, UBE2C, CENPF, NUSAP1, CCNA2, RAD54L, NCAPH, BIRC5, KPNA2              | 6.41E-12 |
| 33 | 15  | 57 | 5  | Mitotic Sister Chromatid Segregation                 | 5.75E-09 | ESPL1, NDC80, SMC4, NUSAP1, NCAPH                                                                                                                                         | 4.75E-07 |
| 33 | 134 | 57 | 21 | Mitotic Cell Cycle                                   | 5.23E-14 | BUB1, FBXO5, TTK, ESPL1, PLK1, NDC80, AURKA, KIF11, KIF23, SMC4, PRC1, TPX2, BUB1B, KIF15, UBE2C, CENPF, NUSAP1, CCNA2, NCAPH, BIRC5, KPNA2                               | 6.41E-12 |
| 33 | 153 | 57 | 19 | Cell Cycle Phase                                     | 1.15E-14 | BUB1, TTK, ESPL1, PLK1, NDC80, AURKA, KIF11, SMC4, TPX2, BUB1B, KIF15, UBE2C, CENPF, NUSAP1, CCNA2, RAD54L, NCAPH, BIRC5, KPNA2                                           | 3.18E-12 |
| 33 | 43  | 57 | 5  | Cell Cycle Checkpoint Go 0000075                     | 1.67E-06 | BUB1, TTK, BUB1B, CCNA2, BIRC5                                                                                                                                            | 6.25E-05 |
| 33 | 28  | 57 | 7  | Chromosome Segregation                               | 3.99E-11 | ESPL1, NDC80, SMC4, CENPF, NUSAP1, TOP2A, NCAPH                                                                                                                           | 4.12E-09 |
| 33 | 15  | 57 | 3  | Establishment Of Organelle Localization              | 4.39E-05 | CENPF, NUSAP1, BIRC5                                                                                                                                                      | 1.39E-03 |
| 33 | 15  | 57 | 4  | Cell Division                                        | 5.92E-07 | RACGAP1, PRC1, NUSAP1, BIRC5                                                                                                                                              | 2.44E-05 |
| 33 | 44  | 57 | 3  | Dna Recombination                                    | 1.16E-03 | EXO1, RAD54L, KPNA2                                                                                                                                                       | 3.30E-02 |
| 33 | 8   | 57 | 4  | Mitotic Spindle Organization And Biogenesis          | 3.11E-08 | TTK, KIF11, KIF23, PRC1                                                                                                                                                   | 1.98E-06 |
| 33 | 70  | 57 | 16 | Mitosis                                              | 0.00E+00 | BUB1, TTK, ESPL1, PLK1, NDC80, AURKA, KIF11, SMC4, TPX2, BUB1B, KIF15, UBE2C, NUSAP1, CCNA2, NCAPH, BIRC5                                                                 | 0.00E+00 |
| 33 | 276 | 57 | 25 | Cell Cycle Go 0007049                                | 2.81E-14 | BUB1, FBXO5, TTK, ESPL1, PLK1, NDC80, AURKA, RACGAP1, KIF11, KIF23, SMC4, PRC1, TPX2, BUB1B, KIF15, UBE2C, CENPF, NUSAP1, CCNA2, CDC20, RAD54L, CKS2, NCAPH, BIRC5, KPNA2 | 5.24E-12 |

|    |     |    |    |                                          |          |                                                                                                           |          |
|----|-----|----|----|------------------------------------------|----------|-----------------------------------------------------------------------------------------------------------|----------|
| 33 | 16  | 57 | 5  | Sister Chromatid Segregation             | 8.34E-09 | ESPL1, NDC80, SMC4, NUSAP1, NCAPH                                                                         | 6.25E-07 |
| 33 | 19  | 57 | 3  | Organelle Localization                   | 9.23E-05 | CENPF, NUSAP1, BIRC5                                                                                      | 2.82E-03 |
| 33 | 181 | 57 | 8  | Cytoskeleton Organization And Biogenesis | 1.97E-06 | TTK, RACGAP1, KIF11, KIF23, PRC1, NUSAP1, KIF4A, KPNA2                                                    | 7.05E-05 |
| 33 | 105 | 57 | 6  | Chromosome Organization And Biogenesis   | 9.63E-06 | ESPL1, NDC80, SMC4, NUSAP1, TOP2A, NCAPH                                                                  | 3.18E-04 |
| 33 | 27  | 57 | 4  | Dna Packaging                            | 7.30E-06 | SMC4, NUSAP1, TOP2A, NCAPH                                                                                | 2.51E-04 |
| 33 | 9   | 57 | 4  | Spindle Organization And Biogenesis      | 5.58E-08 | TTK, KIF11, KIF23, PRC1                                                                                   | 2.71E-06 |
| 33 | 157 | 57 | 9  | Regulation Of Cell Cycle                 | 4.56E-08 | BUB1, FBXO5, TTK, BUB1B, UBE2C, NUSAP1, CCNA2, CKS2, BIRC5                                                | 2.51E-06 |
| 33 | 72  | 57 | 16 | M Phase Of Mitotic Cell Cycle            | 0.00E+00 | BUB1, TTK, ESPL1, PLK1, NDC80, AURKA, KIF11, SMC4, TPX2, BUB1B, KIF15, UBE2C, NUSAP1, CCNA2, NCAPH, BIRC5 | 0.00E+00 |
| 33 | 8   | 57 | 4  | Chromosome Condensation                  | 3.11E-08 | SMC4, NUSAP1, TOP2A, NCAPH                                                                                | 1.98E-06 |
