# Supplementary material for: A Computational Approach to Identifying Gene-microRNA Modules in Cancer
Source: PubMed Central journal article supplement (PMC4303261; doi:10.1371/journal.pcbi.1004042), 2015-01-22
Supplement: pcbi.1004042.s022.pdf [file pcbi.1004042.s022.pdf]

**Table S15. Ovarian cancer modules with enriched pathways in KEGG.**

| Module ID | m   | k  | x  | Gene Ontology                             | p-value  | Genes                                                                       | p-value  |
|-----------|-----|----|----|-------------------------------------------|----------|-----------------------------------------------------------------------------|----------|
| 2         | 218 | 60 | 8  | Cytokine Cytokine Receptor Interaction    | 1.16E-05 | CXCL13, LTB, CXCL11, IL18, CXCL9, CD27, CXCL10, CCR5                        | 7.16E-04 |
| 2         | 156 | 60 | 10 | Chemokine Signaling Pathway               | 4.31E-09 | CXCL13, CXCL11, CXCL9, VAV1, CXCL10, HCK, DOCK2, CCR5, LYN, FGR             | 8.02E-07 |
| 2         | 116 | 60 | 4  | Cell Adhesion Molecules Cams              | 2.63E-03 | ICOS, SIGLEC1, ITGB2, CD4                                                   | 4.45E-02 |
| 2         | 90  | 60 | 4  | Toll Like Receptor Signaling Pathway      | 1.03E-03 | CXCL11, CXCL9, CXCL10, SPP1                                                 | 1.92E-02 |
| 2         | 42  | 60 | 4  | Cytosolic Dna Sensing Pathway             | 5.41E-05 | IL18, CXCL10, AIM2, CASP1                                                   | 2.52E-03 |
| 2         | 108 | 60 | 5  | Natural Killer Cell Mediated Cytotoxicity | 1.95E-04 | VAV1, LCP2, ITGB2, TYROBP, LCK                                              | 6.05E-03 |
| 2         | 103 | 60 | 5  | T Cell Receptor Signaling Pathway         | 1.56E-04 | ICOS, VAV1, LCP2, CD4, LCK                                                  | 5.81E-03 |
| 2         | 68  | 60 | 4  | B Cell Receptor Signaling Pathway         | 3.57E-04 | BLNK, VAV1, BTK, LYN                                                        | 9.50E-03 |
| 2         | 72  | 60 | 4  | Fc Epsilon Ri Signaling Pathway           | 4.45E-04 | VAV1, LCP2, BTK, LYN                                                        | 1.03E-02 |
| 2         | 84  | 60 | 4  | Fc Gamma R Mediated Phagocytosis          | 7.98E-04 | VAV1, HCK, DOCK2, LYN                                                       | 1.65E-02 |
| 2         | 33  | 60 | 5  | Primary Immunodeficiency                  | 5.53E-07 | BLNK, ICOS, BTK, CD4, LCK                                                   | 5.14E-05 |
| 3         | 32  | 35 | 4  | Dna Replication                           | 2.03E-06 | MCM2, MCM4, POLA2, MCM7                                                     | 1.89E-04 |
| 3         | 111 | 35 | 11 | Cell Cycle                                | 0.00E+00 | CCNE2, PLK1, MCM2, E2F1, CDC6, MCM4, BUB1, TFDP2, CDK2, MCM7, CCNB2         | 0.00E+00 |
| 3         | 92  | 35 | 5  | Oocyte Meiosis                            | 6.32E-06 | CCNE2, PLK1, BUB1, CDK2, CCNB2                                              | 3.92E-04 |
| 3         | 60  | 35 | 3  | P53 Signaling Pathway                     | 6.87E-04 | CCNE2, CDK2, CCNB2                                                          | 2.56E-02 |
| 3         | 73  | 35 | 4  | Progesterone Mediated Oocyte Maturation   | 5.65E-05 | PLK1, BUB1, CDK2, CCNB2                                                     | 2.62E-03 |
| 6         | 32  | 34 | 8  | Dna Replication                           | 3.66E-14 | POLE2, MCM4, MCM6, RFC5, PRIM1, FEN1, MCM2, PCNA                            | 6.81E-12 |
| 6         | 31  | 34 | 4  | Base Excision Repair                      | 1.58E-06 | POLE2, FEN1, PCNA, PARP2                                                    | 9.79E-05 |
| 6         | 41  | 34 | 3  | Nucleotide Excision Repair                | 2.04E-04 | POLE2, RFC5, PCNA                                                           | 7.58E-03 |
| 6         | 23  | 34 | 3  | Mismatch Repair                           | 3.50E-05 | RFC5, MSH6, PCNA                                                            | 1.63E-03 |
| 6         | 111 | 34 | 10 | Cell Cycle                                | 3.20E-13 | CHEK1, CDC7, CCNE2, MCM4, CDK2, MCM6, CDC25A, MCM2, PCNA, BUB1              | 2.97E-11 |
| 6         | 60  | 34 | 3  | P53 Signaling Pathway                     | 6.30E-04 | CHEK1, CCNE2, CDK2                                                          | 1.95E-02 |
| 6         | 73  | 34 | 3  | Progesterone Mediated Oocyte Maturation   | 1.12E-03 | CDK2, CDC25A, BUB1                                                          | 2.97E-02 |
| 8         | 78  | 39 | 4  | Tgf Beta Signaling Pathway                | 1.13E-04 | INHBA, COMP, THBS2, THBS1                                                   | 6.99E-03 |
| 8         | 183 | 39 | 11 | Focal Adhesion                            | 8.60E-12 | MYLK, COMP, ITGB1, THBS2, THBS1, COL3A1, COL1A1, FN1, PDGFRB, COL1A2, ITGA5 | 8.00E-10 |
| 8         | 78  | 39 | 9  | Ecm Receptor Interaction                  | 2.33E-12 | COMP, ITGB1, THBS2, THBS1, COL3A1, COL1A1, FN1, COL1A2, ITGA5               | 4.33E-10 |

|    |     |    |    |                                         |          |                                                                                                 |          |
|----|-----|----|----|-----------------------------------------|----------|-------------------------------------------------------------------------------------------------|----------|
| 8  | 65  | 39 | 3  | Complement And Coagulation Cascades     | 1.19E-03 | SERPINE1, PLAU, PLAUR                                                                           | 4.44E-02 |
| 8  | 182 | 39 | 5  | Regulation Of Actin Cytoskeleton        | 2.83E-04 | MYLK, ITGB1, FN1, PDGFRB, ITGA5                                                                 | 1.32E-02 |
| 12 | 43  | 33 | 3  | Rna Degradation                         | 2.15E-04 | EXOSC5, LSM2, LSM3                                                                              | 1.06E-02 |
| 12 | 32  | 33 | 4  | Dna Replication                         | 1.59E-06 | PRIM1, RFC5, FEN1, MCM2                                                                         | 2.96E-04 |
| 12 | 98  | 33 | 4  | Spliceosome                             | 1.41E-04 | SNRPE, LSM2, CDC5L, LSM3                                                                        | 1.06E-02 |
| 12 | 111 | 33 | 4  | Cell Cycle                              | 2.28E-04 | E2F3, MCM2, STAG2, TFDP2                                                                        | 1.06E-02 |
| 13 | 32  | 78 | 4  | Dna Replication                         | 5.10E-05 | POLE2, MCM7, PCNA, MCM6                                                                         | 4.75E-03 |
| 13 | 111 | 78 | 15 | Cell Cycle                              | 3.29E-14 | BUB1, CCNE2, CDC6, TFDP2, HDAC1, MCM7, ORC2L, PLK1, DBF4, PCNA, CHEK1, MCM6, ORC5L, ORC1L, BUB3 | 6.11E-12 |
| 18 | 32  | 31 | 7  | Dna Replication                         | 1.15E-12 | MCM4, MCM6, RFC5, MCM3, MCM2, FEN1, MCM7                                                        | 2.14E-10 |
| 18 | 111 | 31 | 8  | Cell Cycle                              | 2.67E-10 | CHEK1, CCNE2, MCM4, MCM6, MCM3, MCM2, MCM7, CDC7                                                | 2.48E-08 |
| 20 | 111 | 44 | 8  | Cell Cycle                              | 5.43E-09 | BUB1, PLK1, CCNA2, MAD2L1, CCNB1, BUB1B, CCNB2, CDC20                                           | 1.01E-06 |
| 20 | 92  | 44 | 7  | Oocyte Meiosis                          | 3.67E-08 | BUB1, PLK1, MAD2L1, CCNB1, CCNB2, CDC20, AURKA                                                  | 3.41E-06 |
| 20 | 73  | 44 | 6  | Progesterone Mediated Oocyte Maturation | 2.37E-07 | BUB1, PLK1, CCNA2, MAD2L1, CCNB1, CCNB2                                                         | 1.47E-05 |
| 21 | 218 | 30 | 8  | Cytokine Cytokine Receptor Interaction  | 4.22E-08 | CXCL13, CXCL11, CXCL9, CD27, CCR5, IL2RG, IL2RB, CCR1                                           | 3.92E-06 |
| 21 | 156 | 30 | 8  | Chemokine Signaling Pathway             | 3.05E-09 | CXCL13, CXCL11, CXCL9, CCR5, ITK, CCR1, DOCK2, HCK                                              | 5.66E-07 |
| 21 | 103 | 30 | 4  | T Cell Receptor Signaling Pathway       | 1.17E-04 | ICOS, LCP2, ITK, LCK                                                                            | 5.42E-03 |
| 21 | 33  | 30 | 4  | Primary Immunodeficiency                | 1.22E-06 | ICOS, IL2RG, LCK, BTK                                                                           | 7.55E-05 |
| 22 | 183 | 27 | 8  | Focal Adhesion                          | 4.23E-09 | COL5A3, COL1A1, COL6A1, COL5A1, THBS2, FN1, ITGA5, COL3A1                                       | 3.94E-07 |
| 22 | 78  | 27 | 8  | Ecm Receptor Interaction                | 4.31E-12 | COL5A3, COL1A1, COL6A1, COL5A1, THBS2, FN1, ITGA5, COL3A1                                       | 8.02E-10 |
| 25 | 32  | 29 | 7  | Dna Replication                         | 6.94E-13 | POLE2, MCM2, MCM6, PCNA, FEN1, MCM7, MCM4                                                       | 1.29E-10 |
| 25 | 31  | 29 | 3  | Base Excision Repair                    | 5.39E-05 | POLE2, PCNA, FEN1                                                                               | 3.34E-03 |
| 25 | 111 | 29 | 9  | Cell Cycle                              | 2.97E-12 | CHEK1, CDC7, CCNE2, MCM2, MCM6, PCNA, MCM7, CCNB2, MCM4                                         | 2.76E-10 |
| 25 | 92  | 29 | 3  | Oocyte Meiosis                          | 1.37E-03 | FBXO5, CCNE2, CCNB2                                                                             | 4.26E-02 |
| 25 | 60  | 29 | 3  | P53 Signaling Pathway                   | 3.92E-04 | CHEK1, CCNE2, CCNB2                                                                             | 1.82E-02 |
| 26 | 32  | 44 | 6  | Dna Replication                         | 1.41E-09 | FEN1, PCNA, MCM4, RPA3, RFC5, RFC4                                                              | 2.62E-07 |
| 26 | 41  | 44 | 4  | Nucleotide Excision Repair              | 1.42E-05 | PCNA, RPA3, RFC5, RFC4                                                                          | 6.62E-04 |
| 26 | 23  | 44 | 4  | Mismatch Repair                         | 1.30E-06 | PCNA, RPA3, RFC5, RFC4                                                                          | 8.09E-05 |

|    |     |    |    |                                         |          |                                                                                                 |          |
|----|-----|----|----|-----------------------------------------|----------|-------------------------------------------------------------------------------------------------|----------|
| 26 | 111 | 44 | 8  | Cell Cycle                              | 5.43E-09 | PLK1, CCNA2, MAD2L1, PCNA, CCNB1, MCM4, CHEK1, CDC7                                             | 5.05E-07 |
| 26 | 92  | 44 | 4  | Oocyte Meiosis                          | 3.43E-04 | FBXO5, PLK1, MAD2L1, CCNB1                                                                      | 1.06E-02 |
| 26 | 73  | 44 | 4  | Progesterone Mediated Oocyte Maturation | 1.40E-04 | PLK1, CCNA2, MAD2L1, CCNB1                                                                      | 5.22E-03 |
| 27 | 78  | 55 | 5  | Tgf Beta Signaling Pathway              | 2.71E-05 | INHBA, DCN, COMP, THBS2, THBS1                                                                  | 1.68E-03 |
| 27 | 183 | 55 | 13 | Focal Adhesion                          | 1.21E-12 | COL11A1, COL5A2, COL1A1, LAMB1, COMP, COL5A1, COL4A1, THBS2, COL3A1, PDGFRB, THBS1, FN1, COL1A2 | 1.12E-10 |
| 27 | 78  | 55 | 12 | Ecm Receptor Interaction                | 6.13E-14 | COL11A1, COL5A2, COL1A1, LAMB1, COMP, COL5A1, COL4A1, THBS2, COL3A1, THBS1, FN1, COL1A2         | 1.14E-11 |
| 31 | 42  | 65 | 3  | Proteasome                              | 1.48E-03 | PSMB9, PSMB10, PSME2                                                                            | 3.94E-02 |
| 31 | 218 | 65 | 6  | Cytokine Cytokine Receptor Interaction  | 1.11E-03 | CXCL10, CXCL11, TNFSF10, ACVR2B, CCL5, CXCL9                                                    | 3.46E-02 |
| 31 | 156 | 65 | 7  | Chemokine Signaling Pathway             | 1.98E-05 | STAT1, STAT3, CXCL10, CXCL11, LYN, CCL5, CXCL9                                                  | 1.85E-03 |
| 31 | 108 | 65 | 5  | Lysosome                                | 2.85E-04 | CTSO, CTSD, CTSB, CTSL1, LAPTM5                                                                 | 1.32E-02 |
| 31 | 67  | 65 | 4  | Antigen Processing And Presentation     | 4.59E-04 | CTSB, CTSL1, RFXAP, PSME2                                                                       | 1.71E-02 |
| 31 | 90  | 65 | 6  | Toll Like Receptor Signaling Pathway    | 8.54E-06 | STAT1, CXCL10, CXCL11, SPP1, CCL5, CXCL9                                                        | 1.59E-03 |
| 31 | 42  | 65 | 4  | Cytosolic Dna Sensing Pathway           | 7.42E-05 | PYCARD, CXCL10, CASP1, CCL5                                                                     | 4.60E-03 |
| 33 | 111 | 57 | 8  | Cell Cycle                              | 4.59E-08 | BUB1, TTK, ESPL1, PLK1, BUB1B, CCNA2, CDC20, CCNB2                                              | 8.53E-06 |
| 33 | 92  | 57 | 7  | Oocyte Meiosis                          | 2.34E-07 | BUB1, FBXO5, ESPL1, PLK1, AURKA, CDC20, CCNB2                                                   | 2.17E-05 |
| 33 | 73  | 57 | 4  | Progesterone Mediated Oocyte Maturation | 3.85E-04 | BUB1, PLK1, CCNA2, CCNB2                                                                        | 2.39E-02 |
