# Supplementary material for: A Computational Approach to Identifying Gene-microRNA Modules in Cancer
Source: PubMed Central journal article supplement (PMC4303261; doi:10.1371/journal.pcbi.1004042), 2015-01-22
Supplement: pcbi.1004042.s023.pdf [file pcbi.1004042.s023.pdf]

**Table S16. Ovarian cancer modules with enriched pathways in BioCarta.**

| Module ID | m  | k  | x | Gene Ontology   | p-value  | Genes                                 | p-value  |
|-----------|----|----|---|-----------------|----------|---------------------------------------|----------|
| 2         | 31 | 60 | 4 | Bcr Pathway     | 1.58E-05 | BLNK, VAV1, BTK, LYN                  | 3.44E-03 |
| 3         | 18 | 35 | 5 | Mcm Pathway     | 1.28E-09 | MCM2, CDC6, MCM4, CDK2, MCM7          | 2.79E-07 |
| 5         | 55 | 30 | 3 | Hivnef Pathway  | 3.35E-04 | DFFB, PTK2, CASP7                     | 3.64E-02 |
| 6         | 18 | 34 | 4 | Mcm Pathway     | 1.58E-07 | MCM4, CDK2, MCM6, MCM2                | 3.42E-05 |
| 13        | 18 | 78 | 6 | Mcm Pathway     | 1.06E-09 | CDC6, MCM7, ORC2L, MCM6, ORC5L, ORC1L | 2.30E-07 |
| 13        | 20 | 78 | 4 | Atrbrca Pathway | 7.29E-06 | RAD1, FANCE, FANCG, CHEK1             | 7.91E-04 |
| 18        | 18 | 31 | 5 | Mcm Pathway     | 6.74E-10 | MCM4, MCM6, MCM3, MCM2, MCM7          | 1.46E-07 |
| 21        | 21 | 30 | 3 | Il2 Pathway     | 1.80E-05 | IL2RG, IL2RB, LCK                     | 1.95E-03 |
| 21        | 20 | 30 | 3 | Ctla4 Pathway   | 1.55E-05 | ICOS, ITK, LCK                        | 1.95E-03 |
| 25        | 18 | 29 | 4 | Mcm Pathway     | 8.11E-08 | MCM2, MCM6, MCM7, MCM4                | 1.76E-05 |
| 26        | 23 | 44 | 3 | G2 Pathway      | 7.66E-05 | PLK1, CCNB1, CHEK1                    | 8.31E-03 |
| 26        | 9  | 44 | 3 | Ranms Pathway   | 3.77E-06 | KPNA2, RAN, RANBP1                    | 8.17E-04 |
| 33        | 9  | 57 | 4 | Ranms Pathway   | 5.58E-08 | AURKA, TPX2, KIF15, KPNA2             | 1.21E-05 |
