# Supplementary material for: A Computational Approach to Identifying Gene-microRNA Modules in Cancer
Source: PubMed Central journal article supplement (PMC4303261; doi:10.1371/journal.pcbi.1004042), 2015-01-22
Supplement: pcbi.1004042.s024.pdf [file pcbi.1004042.s024.pdf]

**Table S17. Literature evidences for ovarian cancer-related genes from ovarian cancer modules 22 and 8, and GBM related genes from GBM module 22.**

| Genes  | PubMed ID |
|--------|-----------|
| ITGA5  | 21119598  |
| ITGB1  | 7542622   |
| MMP11  | 18208802  |
| MMP19  | 22902510  |
| CALB2  | 15802873  |
| VCAN   | 20204274  |
| LOXL4  | 19015874  |
| ADAM12 | 21617380  |
| THBS2  | 18955754  |
| FAP    | 22614695  |
| COL6A1 | 21463610  |
| COL1A1 | 22249249  |
| CTSK   | 21463610  |
| TIMP3  | 18344519  |
| THBS1  | 22136063  |
| RECK   | 21432940  |
| MYLK   | 22759382  |
| HNT    | 16115914  |

| Genes  | PubMed ID |
|--------|-----------|
| ITGA5  | 21119598  |
| MMP11  | 18208802  |
| ECM1   | 19422301  |
| GREM1  | 19123201  |
| MMP19  | 22902510  |
| VCAN   | 20204274  |
| LOXL4  | 19015874  |
| ADAM12 | 21617380  |
| THBS2  | 18955754  |
| FAP    | 22614695  |
| COL6A1 | 21463610  |
| COL1A1 | 22249249  |
| CTSK   | 21463610  |

| Genes  | PubMed ID |
|--------|-----------|
| FGFR   | 22837387  |
| PTK2B  | 15967096  |
| FAS    | 9600216   |
| JUN    | 17321721  |
| PXN    | 18813807  |
| ITGA2  | 10744032  |
| BAX    | 11912183  |
| FGF2   | 8381111   |
| AHSG   | 18281421  |
| BCL2L1 | 16187019  |
| CFLAR  | 12635660  |
| MCL1   | 9060818   |
| ITGA3  | 18712382  |
| FGFR4  | 21555372  |
| CD63   | 20150644  |
| PDGFD  | 20406896  |
| FGF14  | 17018610  |
| EFNB2  | 19728339  |

|       |          |
|-------|----------|
| SP100 | 21274506 |
|-------|----------|
