# Supplementary material for: A Computational Approach to Identifying Gene-microRNA Modules in Cancer
Source: PubMed Central journal article supplement (PMC4303261; doi:10.1371/journal.pcbi.1004042), 2015-01-22
Supplement: pcbi.1004042.s025.pdf [file pcbi.1004042.s025.pdf]

**Table S18. GBM modules with enriched GO terms.**

| Module ID | m   | k  | x  | Gene Ontology                                        | p-value  | Genes                                                                                                                                                                                                                                   | p-value  |
|-----------|-----|----|----|------------------------------------------------------|----------|-----------------------------------------------------------------------------------------------------------------------------------------------------------------------------------------------------------------------------------------|----------|
| 2         | 234 | 98 | 15 | Dna Metabolic Process                                | 5.93E-10 | TOP2A, RAD51, CDT1, POLQ, EXO1, MSH5, RAD54L, KPNA2, CHEK1, BRCA1, MCM2, HMGB2, CDC6, MCM3, MCM7                                                                                                                                        | 3.77E-08 |
| 2         | 118 | 98 | 7  | Dna Repair                                           | 4.81E-05 | RAD51, POLQ, EXO1, MSH5, RAD54L, BRCA1, HMGB2                                                                                                                                                                                           | 1.17E-03 |
| 2         | 19  | 98 | 7  | Mitotic Cell Cycle Checkpoint                        | 8.83E-11 | TTK, BUB1, KNTC1, BUB1B, ZWINT, CCNA2, MAD2L1                                                                                                                                                                                           | 6.07E-09 |
| 2         | 13  | 98 | 3  | Cytokinesis                                          | 1.41E-04 | RACGAP1, PRC1, BIRC5                                                                                                                                                                                                                    | 3.32E-03 |
| 2         | 20  | 98 | 3  | Meiosis I                                            | 5.39E-04 | RAD51, MSH5, CHEK1                                                                                                                                                                                                                      | 1.03E-02 |
| 2         | 177 | 98 | 10 | Response To Endogenous Stimulus                      | 1.67E-06 | RAD51, POLQ, EXO1, MSH5, RAD54L, CHEK1, CCNA2, BRCA1, HMGB2, MCM7                                                                                                                                                                       | 4.93E-05 |
| 2         | 99  | 98 | 26 | M Phase                                              | 0.00E+00 | NDC80, CENPE, KIF2C, TTK, ESPL1, KIF15, KIF11, NCAPH, AURKA, BUB1, RAD51, KNTC1, MSH5, DDX11, RAD54L, BUB1B, KPNA2, PLK1, ZWINT, CHEK1, TPX2, CCNA2, NEK2, CDC25C, MAD2L1, BIRC5                                                        | 0.00E+00 |
| 2         | 74  | 98 | 8  | Microtubule Based Process                            | 1.40E-07 | KIF2C, TTK, KIF11, KIF23, KIF4A, KPNA2, PRC1, TUBG1                                                                                                                                                                                     | 5.48E-06 |
| 2         | 20  | 98 | 4  | Dna Integrity Checkpoint                             | 1.81E-05 | CDT1, CHEK1, CCNA2, CDC6                                                                                                                                                                                                                | 4.52E-04 |
| 2         | 33  | 98 | 10 | Regulation Of Mitosis                                | 1.65E-14 | TTK, BUB1, KNTC1, BUB1B, ZWINT, CCNA2, NEK2, CDC25C, MAD2L1, BIRC5                                                                                                                                                                      | 1.52E-12 |
| 2         | 31  | 98 | 6  | Microtubule Cytoskeleton Organization And Biogenesis | 1.55E-07 | KIF2C, TTK, KIF11, KIF23, PRC1, TUBG1                                                                                                                                                                                                   | 5.83E-06 |
| 2         | 63  | 98 | 7  | Interphase                                           | 7.26E-07 | CENPF, CDC7, DDX11, KPNA2, CDC6, CDC25C, BIRC5                                                                                                                                                                                          | 2.22E-05 |
| 2         | 170 | 98 | 34 | Cell Cycle Process                                   | 0.00E+00 | NDC80, CENPE, CENPF, KIF2C, TTK, ESPL1, KIF15, KIF11, NCAPH, AURKA, RACGAP1, BUB1, FBXO5, KIF23, RAD51, KNTC1, CDC7, MSH5, DDX11, RAD54L, BUB1B, KPNA2, PLK1, ZWINT, CHEK1, TPX2, CCNA2, PRC1, NEK2, CDC6, CDC25C, TUBG1, MAD2L1, BIRC5 | 0.00E+00 |
| 2         | 15  | 98 | 6  | Mitotic Sister Chromatid Segregation                 | 1.17E-09 | NDC80, CENPE, ESPL1, NCAPH, DDX11, ZWINT                                                                                                                                                                                                | 6.92E-08 |
| 2         | 39  | 98 | 4  | Regulation Of Dna Metabolic Process                  | 2.73E-04 | RAD51, CDT1, KPNA2, CDC6                                                                                                                                                                                                                | 5.77E-03 |
| 2         | 32  | 98 | 5  | Meiotic Cell Cycle                                   | 5.45E-06 | RAD51, MSH5, RAD54L, CHEK1, TUBG1                                                                                                                                                                                                       | 1.50E-04 |

|   |     |    |    |                                             |          |                                                                                                                                                                                                     |          |
|---|-----|----|----|---------------------------------------------|----------|-----------------------------------------------------------------------------------------------------------------------------------------------------------------------------------------------------|----------|
| 2 | 134 | 98 | 28 | Mitotic Cell Cycle                          | 0.00E+00 | NDC80, CENPE, CENPF, KIF2C, TTK, ESPL1, KIF15, KIF11, NCAPH, AURKA, BUB1, FBXO5, KIF23, KNTC1, CDC7, DDX11, BUB1B, KPNA2, PLK1, ZWINT, TPX2, CCNA2, PRC1, NEK2, CDC6, CDC25C, MAD2L1, BIRC5         | 0.00E+00 |
| 2 | 134 | 98 | 28 | Mitotic Cell Cycle                          | 0.00E+00 | NDC80, CENPE, CENPF, KIF2C, TTK, ESPL1, KIF15, KIF11, NCAPH, AURKA, BUB1, FBXO5, KIF23, KNTC1, CDC7, DDX11, BUB1B, KPNA2, PLK1, ZWINT, TPX2, CCNA2, PRC1, NEK2, CDC6, CDC25C, MAD2L1, BIRC5         | 0.00E+00 |
| 2 | 153 | 98 | 29 | Cell Cycle Phase                            | 0.00E+00 | NDC80, CENPE, CENPF, KIF2C, TTK, ESPL1, KIF15, KIF11, NCAPH, AURKA, BUB1, RAD51, KNTC1, CDC7, MSH5, DDX11, RAD54L, BUB1B, KPNA2, PLK1, ZWINT, CHEK1, TPX2, CCNA2, NEK2, CDC6, CDC25C, MAD2L1, BIRC5 | 0.00E+00 |
| 2 | 43  | 98 | 11 | Cell Cycle Checkpoint Go 0000075            | 5.66E-15 | TTK, BUB1, KNTC1, CDT1, BUB1B, ZWINT, CHEK1, CCNA2, CDC6, MAD2L1, BIRC5                                                                                                                             | 5.84E-13 |
| 2 | 15  | 98 | 3  | Dna Replication Initiation                  | 2.22E-04 | CDT1, CDC6, MCM3                                                                                                                                                                                    | 4.81E-03 |
| 2 | 28  | 98 | 9  | Chromosome Segregation                      | 6.18E-13 | NDC80, CENPE, CENPF, TOP2A, ESPL1, NCAPH, DDX11, ZWINT, BRCA1                                                                                                                                       | 5.10E-11 |
| 2 | 15  | 98 | 3  | Establishment Of Organelle Localization     | 2.22E-04 | CENPE, CENPF, BIRC5                                                                                                                                                                                 | 4.81E-03 |
| 2 | 15  | 98 | 3  | Cell Division                               | 2.22E-04 | RACGAP1, PRC1, BIRC5                                                                                                                                                                                | 4.81E-03 |
| 2 | 19  | 98 | 4  | Regulation Of Mitotic Cell Cycle            | 1.46E-05 | FBXO5, CDC6, CDC25C, BIRC5                                                                                                                                                                          | 3.87E-04 |
| 2 | 93  | 98 | 9  | Dna Replication                             | 5.90E-08 | RAD51, CDT1, EXO1, MSH5, MCM2, HMGB2, CDC6, MCM3, MCM7                                                                                                                                              | 2.44E-06 |
| 2 | 31  | 98 | 3  | Dna Damage Responsesignal Transduction      | 1.99E-03 | CHEK1, CCNA2, BRCA1                                                                                                                                                                                 | 3.65E-02 |
| 2 | 44  | 98 | 7  | Dna Recombination                           | 5.70E-08 | RAD51, EXO1, MSH5, RAD54L, KPNA2, CHEK1, BRCA1                                                                                                                                                      | 2.44E-06 |
| 2 | 8   | 98 | 4  | Mitotic Spindle Organization And Biogenesis | 2.82E-07 | TTK, KIF11, KIF23, PRC1                                                                                                                                                                             | 9.68E-06 |
| 2 | 17  | 98 | 3  | Meiotic Recombination                       | 3.27E-04 | RAD51, MSH5, CHEK1                                                                                                                                                                                  | 6.75E-03 |
| 2 | 70  | 98 | 21 | Mitosis                                     | 0.00E+00 | NDC80, CENPE, KIF2C, TTK, ESPL1, KIF15, KIF11, NCAPH, AURKA, BUB1, KNTC1, DDX11, BUB1B, PLK1, ZWINT, TPX2, CCNA2, NEK2, CDC25C, MAD2L1, BIRC5                                                       | 0.00E+00 |

|   |     |     |    |                                          |          |                                                                                                                                                                                                                                                            |          |
|---|-----|-----|----|------------------------------------------|----------|------------------------------------------------------------------------------------------------------------------------------------------------------------------------------------------------------------------------------------------------------------|----------|
| 2 | 276 | 98  | 37 | Cell Cycle Go 0007049                    | 0.00E+00 | NDC80, CENPE, CENPF, KIF2C, TTK, ESPL1, KIF15, KIF11, NCAPH, AURKA, RACGAP1, BUB1, FBXO5, KIF23, RAD51, KNTC1, CDT1, CDC7, MSH5, DDX11, RAD54L, BUB1B, KPNA2, PLK1, ZWINT, CHEK1, TPX2, CCNA2, MCM2, PRC1, NEK2, CDC6, CDC25C, TUBG1, CDC20, MAD2L1, BIRC5 | 0.00E+00 |
| 2 | 16  | 98  | 6  | Sister Chromatid Segregation             | 1.87E-09 | NDC80, CENPE, ESPL1, NCAPH, DDX11, ZWINT                                                                                                                                                                                                                   | 1.03E-07 |
| 2 | 19  | 98  | 3  | Organelle Localization                   | 4.61E-04 | CENPE, CENPF, BIRC5                                                                                                                                                                                                                                        | 9.05E-03 |
| 2 | 181 | 98  | 9  | Cytoskeleton Organization And Biogenesis | 1.60E-05 | KIF2C, TTK, KIF11, RACGAP1, KIF23, KIF4A, KPNA2, PRC1, TUBG1                                                                                                                                                                                               | 4.13E-04 |
| 2 | 105 | 98  | 8  | Chromosome Organization And Biogenesis   | 2.10E-06 | NDC80, CENPE, TOP2A, ESPL1, NCAPH, DDX11, ZWINT, EZH2                                                                                                                                                                                                      | 5.98E-05 |
| 2 | 51  | 98  | 7  | Dna Dependent Dna Replication            | 1.64E-07 | RAD51, CDT1, EXO1, MSH5, HMGB2, CDC6, MCM3                                                                                                                                                                                                                 | 5.90E-06 |
| 2 | 57  | 98  | 7  | Interphase Of Mitotic Cell Cycle         | 3.61E-07 | CENPF, CDC7, DDX11, KPNA2, CDC6, CDC25C, BIRC5                                                                                                                                                                                                             | 1.16E-05 |
| 2 | 9   | 98  | 5  | Spindle Organization And Biogenesis      | 3.95E-09 | TTK, KIF11, KIF23, PRC1, TUBG1                                                                                                                                                                                                                             | 2.04E-07 |
| 2 | 150 | 98  | 10 | Response To Dna Damage Stimulus          | 3.65E-07 | RAD51, POLQ, EXO1, MSH5, RAD54L, CHEK1, CCNA2, BRCA1, HMGB2, MCM7                                                                                                                                                                                          | 1.16E-05 |
| 2 | 157 | 98  | 15 | Regulation Of Cell Cycle                 | 1.96E-12 | TTK, BUB1, FBXO5, KNTC1, CDT1, CDC7, BUB1B, ZWINT, CHEK1, CCNA2, NEK2, CDC6, CDC25C, MAD2L1, BIRC5                                                                                                                                                         | 1.47E-10 |
| 2 | 72  | 98  | 21 | M Phase Of Mitotic Cell Cycle            | 0.00E+00 | NDC80, CENPE, KIF2C, TTK, ESPL1, KIF15, KIF11, NCAPH, AURKA, BUB1, KNTC1, DDX11, BUB1B, PLK1, ZWINT, TPX2, CCNA2, NEK2, CDC25C, MAD2L1, BIRC5                                                                                                              | 0.00E+00 |
| 3 | 43  | 101 | 5  | Cell Cycle Checkpoint Go 0000075         | 2.81E-05 | KNTC1, RAD9A, CHFR, ATM, ATR                                                                                                                                                                                                                               | 1.44E-02 |
| 3 | 74  | 101 | 6  | Rna Splicing                             | 3.50E-05 | PRPF3, SRRM1, PPIG, PRPF4B, TRA2A, SFRS2IP                                                                                                                                                                                                                 | 1.44E-02 |
| 3 | 150 | 101 | 7  | Response To Dna Damage Stimulus          | 2.62E-04 | LIG1, MSH5, RAD9A, ATM, XRCC2, ATR, BCL6                                                                                                                                                                                                                   | 4.32E-02 |
| 4 | 233 | 41  | 9  | Defense Response                         | 6.66E-08 | CXCL11, NMI, TLR3, CXCL10, APOL3, RSAD2, MX2, HCP5, MX1                                                                                                                                                                                                    | 5.49E-05 |
| 4 | 63  | 41  | 4  | Response To Other Organism               | 5.96E-05 | IRF7, IFI44, TLR3, RSAD2                                                                                                                                                                                                                                   | 2.46E-02 |
| 5 | 234 | 56  | 12 | Dna Metabolic Process                    | 5.74E-10 | LIG1, CHEK1, NASP, MCM7, FANCC, RAD51, EXO1, XRCC2, CDK2, MCM2, MCM3, TOP2A                                                                                                                                                                                | 5.92E-08 |
| 5 | 118 | 56  | 5  | Dna Repair                               | 2.13E-04 | LIG1, FANCC, RAD51, EXO1, XRCC2                                                                                                                                                                                                                            | 6.05E-03 |
| 5 | 19  | 56  | 3  | Mitotic Cell Cycle Checkpoint            | 8.76E-05 | KNTC1, TTK, BUB1B                                                                                                                                                                                                                                          | 2.72E-03 |

|   |     |    |    |                                                      |          |                                                                                                                                                     |          |
|---|-----|----|----|------------------------------------------------------|----------|-----------------------------------------------------------------------------------------------------------------------------------------------------|----------|
| 5 | 177 | 56 | 7  | Response To Endogenous Stimulus                      | 1.66E-05 | LIG1, CHEK1, MCM7, FANCC, RAD51, EXO1, XRCC2                                                                                                        | 6.54E-04 |
| 5 | 99  | 56 | 14 | M Phase                                              | 4.66E-15 | CENPE, CHEK1, RAD51, XRCC2, KIF2C, NCAPH, TPX2, KIF15, KIF11, NDC80, KNTC1, TTK, PLK1, BUB1B                                                        | 9.62E-13 |
| 5 | 74  | 56 | 6  | Microtubule Based Process                            | 1.12E-06 | KIF2C, KIF11, PRC1, KIF4A, TTK, KIF23                                                                                                               | 5.75E-05 |
| 5 | 33  | 56 | 3  | Regulation Of Mitosis                                | 4.71E-04 | KNTC1, TTK, BUB1B                                                                                                                                   | 1.21E-02 |
| 5 | 31  | 56 | 5  | Microtubule Cytoskeleton Organization And Biogenesis | 2.81E-07 | KIF2C, KIF11, PRC1, TTK, KIF23                                                                                                                      | 1.65E-05 |
| 5 | 170 | 56 | 20 | Cell Cycle Process                                   | 4.97E-14 | CENPE, CHEK1, TIMELESS, RAD51, XRCC2, KIF2C, NCAPH, TPX2, CENPF, KIF15, CDK2, KIF11, NDC80, PRC1, KNTC1, TTK, PLK1, FBXO5, BUB1B, KIF23             | 5.86E-12 |
| 5 | 15  | 56 | 3  | Mitotic Sister Chromatid Segregation                 | 4.17E-05 | CENPE, NCAPH, NDC80                                                                                                                                 | 1.56E-03 |
| 5 | 32  | 56 | 3  | Meiotic Cell Cycle                                   | 4.29E-04 | CHEK1, RAD51, XRCC2                                                                                                                                 | 1.14E-02 |
| 5 | 134 | 56 | 16 | Mitotic Cell Cycle                                   | 0.00E+00 | CENPE, KIF2C, NCAPH, TPX2, CENPF, KIF15, CDK2, KIF11, NDC80, PRC1, KNTC1, TTK, PLK1, FBXO5, BUB1B, KIF23                                            | 0.00E+00 |
| 5 | 153 | 56 | 17 | Cell Cycle Phase                                     | 1.07E-14 | CENPE, CHEK1, TIMELESS, RAD51, XRCC2, KIF2C, NCAPH, TPX2, CENPF, KIF15, CDK2, KIF11, NDC80, KNTC1, TTK, PLK1, BUB1B                                 | 1.47E-12 |
| 5 | 43  | 56 | 4  | Cell Cycle Checkpoint Go 0000075                     | 4.52E-05 | CHEK1, KNTC1, TTK, BUB1B                                                                                                                            | 1.62E-03 |
| 5 | 28  | 56 | 5  | Chromosome Segregation                               | 1.64E-07 | CENPE, NCAPH, CENPF, NDC80, TOP2A                                                                                                                   | 1.13E-05 |
| 5 | 93  | 56 | 7  | Dna Replication                                      | 2.22E-07 | NASP, MCM7, RAD51, EXO1, CDK2, MCM2, MCM3                                                                                                           | 1.41E-05 |
| 5 | 44  | 56 | 4  | Dna Recombination                                    | 4.96E-05 | LIG1, CHEK1, RAD51, EXO1                                                                                                                            | 1.69E-03 |
| 5 | 8   | 56 | 4  | Mitotic Spindle Organization And Biogenesis          | 2.90E-08 | KIF11, PRC1, TTK, KIF23                                                                                                                             | 2.39E-06 |
| 5 | 70  | 56 | 11 | Mitosis                                              | 0.00E+00 | CENPE, KIF2C, NCAPH, TPX2, KIF15, KIF11, NDC80, KNTC1, TTK, PLK1, BUB1B                                                                             | 0.00E+00 |
| 5 | 276 | 56 | 22 | Cell Cycle Go 0007049                                | 0.00E+00 | CENPE, CHEK1, NASP, TIMELESS, RAD51, XRCC2, KIF2C, NCAPH, TPX2, CENPF, KIF15, CDK2, MCM2, KIF11, NDC80, PRC1, KNTC1, TTK, PLK1, FBXO5, BUB1B, KIF23 | 0.00E+00 |
| 5 | 16  | 56 | 3  | Sister Chromatid Segregation                         | 5.11E-05 | CENPE, NCAPH, NDC80                                                                                                                                 | 1.69E-03 |
| 5 | 181 | 56 | 6  | Cytoskeleton Organization And Biogenesis             | 1.85E-04 | KIF2C, KIF11, PRC1, KIF4A, TTK, KIF23                                                                                                               | 5.44E-03 |
| 5 | 105 | 56 | 7  | Chromosome Organization And Biogenesis               | 5.11E-07 | CENPE, NASP, CHAF1A, NCAPH, NDC80, TOP2A, EZH2                                                                                                      | 2.81E-05 |
| 5 | 51  | 56 | 4  | Dna Dependent Dna Replication                        | 8.91E-05 | RAD51, EXO1, CDK2, MCM3                                                                                                                             | 2.72E-03 |

|   |     |    |    |                                     |          |                                                                               |          |
|---|-----|----|----|-------------------------------------|----------|-------------------------------------------------------------------------------|----------|
| 5 | 27  | 56 | 3  | Dna Packaging                       | 2.57E-04 | CHAF1A, NCAPH, TOP2A                                                          | 7.08E-03 |
| 5 | 9   | 56 | 4  | Spindle Organization And Biogenesis | 5.19E-08 | KIF11, PRC1, TTK, KIF23                                                       | 3.90E-06 |
| 5 | 150 | 56 | 7  | Response To Dna Damage Stimulus     | 5.63E-06 | LIG1, CHEK1, MCM7, FANCC, RAD51, EXO1, XRCC2                                  | 2.58E-04 |
| 5 | 157 | 56 | 7  | Regulation Of Cell Cycle            | 7.60E-06 | CHEK1, TIMELESS, CDK2, KNTC1, TTK, FBXO5, BUB1B                               | 3.14E-04 |
| 5 | 72  | 56 | 11 | M Phase Of Mitotic Cell Cycle       | 8.10E-15 | CENPE, KIF2C, NCAPH, TPX2, KIF15, KIF11, NDC80, KNTC1, TTK, PLK1, BUB1B       | 1.34E-12 |
| 6 | 146 | 23 | 4  | Synaptic Transmission               | 1.53E-04 | GRM3, MBP, NPY, PLP1                                                          | 4.22E-02 |
| 6 | 16  | 23 | 3  | Regulation Of Action Potential      | 3.35E-06 | MAL, MBP, PLP1                                                                | 2.77E-03 |
| 6 | 159 | 23 | 5  | Transmission Of Nerve Impulse       | 1.05E-05 | GRM3, MAL, MBP, NPY, PLP1                                                     | 4.32E-03 |
| 7 | 99  | 43 | 7  | M Phase                             | 5.18E-08 | BIRC5, MAD2L1, AURKA, BUB1B, RAD54B, NCAPH, NDC80                             | 1.16E-05 |
| 7 | 33  | 43 | 3  | Regulation Of Mitosis               | 2.15E-04 | BIRC5, MAD2L1, BUB1B                                                          | 2.21E-02 |
| 7 | 170 | 43 | 9  | Cell Cycle Process                  | 6.73E-09 | BIRC5, MAD2L1, DBF4, AURKA, BUB1B, RACGAP1, RAD54B, NCAPH, NDC80              | 2.78E-06 |
| 7 | 134 | 43 | 7  | Mitotic Cell Cycle                  | 4.17E-07 | BIRC5, MAD2L1, DBF4, AURKA, BUB1B, NCAPH, NDC80                               | 4.91E-05 |
| 7 | 153 | 43 | 8  | Cell Cycle Phase                    | 5.62E-08 | BIRC5, MAD2L1, DBF4, AURKA, BUB1B, RAD54B, NCAPH, NDC80                       | 1.16E-05 |
| 7 | 43  | 43 | 3  | Cell Cycle Checkpoint Go 0000075    | 4.74E-04 | BIRC5, MAD2L1, BUB1B                                                          | 4.34E-02 |
| 7 | 70  | 43 | 6  | Mitosis                             | 1.60E-07 | BIRC5, MAD2L1, AURKA, BUB1B, NCAPH, NDC80                                     | 2.60E-05 |
| 7 | 276 | 43 | 11 | Cell Cycle Go 0007049               | 2.26E-09 | DTYMK, BIRC5, MAD2L1, DBF4, AURKA, GMNN, BUB1B, RACGAP1, RAD54B, NCAPH, NDC80 | 1.86E-06 |
| 7 | 72  | 43 | 6  | M Phase Of Mitotic Cell Cycle       | 1.89E-07 | BIRC5, MAD2L1, AURKA, BUB1B, NCAPH, NDC80                                     | 2.60E-05 |
| 8 | 233 | 73 | 12 | Defense Response                    | 1.35E-08 | PTX3, IL32, CCL20, STAB1, TCIRG1, HP, CCR5, NCF1, WAS, CEBPB, CCR1, PTPRC     | 2.78E-06 |
| 8 | 128 | 73 | 7  | Behavior                            | 1.18E-05 | CXCL5, CCL20, RNASE2, CCR5, PLAUR, SYK, CCL2                                  | 1.22E-03 |
| 8 | 80  | 73 | 7  | Locomotory Behavior                 | 5.01E-07 | CXCL5, CCL20, RNASE2, CCR5, PLAUR, SYK, CCL2                                  | 6.89E-05 |
| 8 | 113 | 73 | 5  | Inflammatory Response               | 6.02E-04 | PTX3, CCL20, CCR5, CEBPB, CCR1                                                | 2.61E-02 |
| 8 | 88  | 73 | 6  | Cellular Cation Homeostasis         | 1.47E-05 | STC1, CP, CCR5, CCR1, CCL2, PTPRC                                             | 1.35E-03 |
| 8 | 261 | 73 | 11 | Response To Chemical Stimulus       | 4.36E-07 | SOD2, CXCL5, STC1, CCL20, RNASE2, HSPA6, CCR5, PLAUR, SYK, CCL2, LYN          | 6.89E-05 |
| 8 | 207 | 73 | 12 | Immune Response                     | 3.55E-09 | TREM1, IL32, IL1R2, CCL20, CCR5, IL4R, FCGR2B, WAS, CEBPB, CCR1, CCL2, PTPRC  | 1.46E-06 |
| 8 | 172 | 73 | 8  | Homeostatic Process                 | 8.98E-06 | STC1, CP, CCR5, SPI1, CCR1, CCL2, LYN, PTPRC                                  | 1.06E-03 |

|    |     |    |    |                                  |          |                                                                                              |          |
|----|-----|----|----|----------------------------------|----------|----------------------------------------------------------------------------------------------|----------|
| 8  | 115 | 73 | 6  | Cellular Homeostasis             | 6.73E-05 | STC1, CP, CCR5, CCR1, CCL2, PTPRC                                                            | 4.02E-03 |
| 8  | 290 | 73 | 15 | Immune System Process            | 1.54E-10 | TREMI, IL32, IL1R2, CCL20, CCR5, IL4R, FCGR2B, WAS, CEBPB, SPI1, SYK, CCR1, CCL2, LYN, PTPRC | 1.27E-07 |
| 8  | 269 | 73 | 13 | Response To External Stimulus    | 6.74E-09 | PTX3, CXCL5, STC1, CCL20, RNASE2, THBD, CCR5, PLAUR, WAS, CEBPB, SYK, CCR1, CCL2             | 1.85E-06 |
| 8  | 130 | 73 | 6  | Chemical Homeostasis             | 1.33E-04 | STC1, CP, CCR5, CCR1, CCL2, PTPRC                                                            | 7.30E-03 |
| 8  | 107 | 73 | 6  | Ion Homeostasis                  | 4.49E-05 | STC1, CP, CCR5, CCR1, CCL2, PTPRC                                                            | 3.17E-03 |
| 8  | 91  | 73 | 6  | Cation Homeostasis               | 1.79E-05 | STC1, CP, CCR5, CCR1, CCL2, PTPRC                                                            | 1.47E-03 |
| 8  | 168 | 73 | 7  | Response To Wounding             | 6.82E-05 | PTX3, CCL20, THBD, CCR5, WAS, CEBPB, CCR1                                                    | 4.02E-03 |
| 10 | 234 | 73 | 10 | Dna Metabolic Process            | 1.35E-06 | CHEK1, ORC2L, CDK2, CDT1, POLQ, MSH6, FEN1, MCM3, FANCG, MCM2                                | 8.55E-05 |
| 10 | 19  | 73 | 4  | Mitotic Cell Cycle Checkpoint    | 4.50E-06 | KNTC1, BUB1B, ZWINT, CCNA2                                                                   | 2.32E-04 |
| 10 | 177 | 73 | 7  | Response To Endogenous Stimulus  | 9.48E-05 | CHEK1, POLQ, MSH6, FEN1, FANCG, CCNA2, LYN                                                   | 3.40E-03 |
| 10 | 99  | 73 | 10 | M Phase                          | 3.59E-10 | CHEK1, PLK1, KNTC1, BUB1B, NDC80, TPX2, ZWINT, KIF2C, CCNA2, AURKA                           | 4.30E-08 |
| 10 | 20  | 73 | 3  | Dna Integrity Checkpoint         | 2.26E-04 | CHEK1, CDT1, CCNA2                                                                           | 7.78E-03 |
| 10 | 33  | 73 | 4  | Regulation Of Mitosis            | 4.45E-05 | KNTC1, BUB1B, ZWINT, CCNA2                                                                   | 1.93E-03 |
| 10 | 170 | 73 | 13 | Cell Cycle Process               | 2.30E-11 | CHEK1, CDK2, PLK1, KNTC1, BUB1B, SKP2, NDC80, TPX2, ZWINT, KIF2C, CCNA2, AURKA, CDKN3        | 4.75E-09 |
| 10 | 134 | 73 | 12 | Mitotic Cell Cycle               | 2.25E-11 | CDK2, PLK1, KNTC1, BUB1B, SKP2, NDC80, TPX2, ZWINT, KIF2C, CCNA2, AURKA, CDKN3               | 4.75E-09 |
| 10 | 153 | 73 | 13 | Cell Cycle Phase                 | 5.93E-12 | CHEK1, CDK2, PLK1, KNTC1, BUB1B, SKP2, NDC80, TPX2, ZWINT, KIF2C, CCNA2, AURKA, CDKN3        | 2.52E-09 |
| 10 | 43  | 73 | 7  | Cell Cycle Checkpoint Go 0000075 | 6.07E-09 | CHEK1, KNTC1, CDT1, BUB1B, ZWINT, FANCG, CCNA2                                               | 5.01E-07 |
| 10 | 15  | 73 | 3  | Dna Replication Initiation       | 9.23E-05 | ORC2L, CDT1, MCM3                                                                            | 3.40E-03 |
| 10 | 28  | 73 | 3  | Chromosome Segregation           | 6.28E-04 | NDC80, SRPK1, ZWINT                                                                          | 1.92E-02 |
| 10 | 138 | 73 | 8  | Rna Processing                   | 1.74E-06 | NONO, NCBP1, SFRS1, NUDT21, CSTF2, SRPK1, SFRS2, CPSF6                                       | 1.03E-04 |
| 10 | 61  | 73 | 8  | Mrna Processing Go 0006397       | 2.80E-09 | NONO, NCBP1, SFRS1, NUDT21, CSTF2, SRPK1, SFRS2, CPSF6                                       | 2.57E-07 |
| 10 | 93  | 73 | 6  | Dna Replication                  | 2.02E-05 | ORC2L, CDK2, CDT1, MSH6, MCM3, MCM2                                                          | 9.28E-04 |

|    |     |    |    |                                                                  |          |                                                                                                          |          |
|----|-----|----|----|------------------------------------------------------------------|----------|----------------------------------------------------------------------------------------------------------|----------|
| 10 | 70  | 73 | 9  | Mitosis                                                          | 3.22E-10 | PLK1, KNTC1, BUB1B, NDC80, TPX2, ZWINT, KIF2C, CCNA2, AURKA                                              | 4.30E-08 |
| 10 | 276 | 73 | 16 | Cell Cycle Go 0007049                                            | 6.10E-12 | CHEK1, CDK2, PLK1, KNTC1, CDT1, BUB1B, SKP2, NDC80, TPX2, ZWINT, FANCG, KIF2C, CCNA2, AURKA, CDKN3, MCM2 | 2.52E-09 |
| 10 | 71  | 73 | 9  | Mrna Metabolic Process                                           | 3.67E-10 | NONO, NCBP1, SFRS1, NUDT21, CSTF2, UPF2, SRPK1, SFRS2, CPSF6                                             | 4.30E-08 |
| 10 | 74  | 73 | 5  | Rna Splicing                                                     | 8.29E-05 | NONO, NCBP1, SFRS1, SRPK1, SFRS2                                                                         | 3.26E-03 |
| 10 | 51  | 73 | 5  | Dna Dependent Dna Replication                                    | 1.35E-05 | ORC2L, CDK2, CDT1, MSH6, MCM3                                                                            | 6.54E-04 |
| 10 | 150 | 73 | 6  | Response To Dna Damage Stimulus                                  | 2.89E-04 | CHEK1, POLQ, MSH6, FEN1, FANCG, CCNA2                                                                    | 9.55E-03 |
| 10 | 157 | 73 | 9  | Regulation Of Cell Cycle                                         | 4.12E-07 | CHEK1, CDK2, KNTC1, CDT1, BUB1B, ZWINT, FANCG, CCNA2, CDKN3                                              | 2.83E-05 |
| 10 | 72  | 73 | 9  | M Phase Of Mitotic Cell Cycle                                    | 4.17E-10 | PLK1, KNTC1, BUB1B, NDC80, TPX2, ZWINT, KIF2C, CCNA2, AURKA                                              | 4.30E-08 |
| 11 | 95  | 89 | 6  | Positive Regulation Of Signal Transduction                       | 7.05E-05 | TNFRSF10B, CFLAR, TNFRSF1A, TICAM1, MYD88, FLNA                                                          | 6.47E-03 |
| 11 | 128 | 89 | 6  | Enzyme Linked Receptor Protein Signaling Pathway                 | 3.62E-04 | SHC1, PXN, PTK2B, FGFR4, ERBB2, CBLC                                                                     | 2.30E-02 |
| 11 | 87  | 89 | 6  | I Kappab Kinase Nf Kappab Cascade                                | 4.30E-05 | TNFRSF10B, CFLAR, TNFRSF1A, TICAM1, MYD88, FLNA                                                          | 5.06E-03 |
| 11 | 170 | 89 | 9  | Regulation Of Signal Transduction                                | 4.35E-06 | RGS4, SHC1, TNFRSF10B, CFLAR, TNFRSF1A, TICAM1, MYD88, CBLC, FLNA                                        | 1.87E-03 |
| 11 | 66  | 89 | 6  | Positive Regulation Of I Kappab Kinase Nf Kappab Cascade         | 8.75E-06 | TNFRSF10B, CFLAR, TNFRSF1A, TICAM1, MYD88, FLNA                                                          | 1.87E-03 |
| 11 | 236 | 89 | 10 | Protein Kinase Cascade                                           | 9.06E-06 | RGS4, SHC1, TNFRSF10B, NMI, CFLAR, FGF2, TNFRSF1A, TICAM1, MYD88, FLNA                                   | 1.87E-03 |
| 11 | 57  | 89 | 4  | Regulation Of Map Kinase Activity                                | 8.17E-04 | RGS4, SHC1, FGF2, ERBB2                                                                                  | 4.81E-02 |
| 11 | 269 | 89 | 9  | Response To External Stimulus                                    | 1.62E-04 | ITGA2, NMI, F11R, AHSG, FGF2, TNFRSF1A, MAPK1, PTX3, CDKN1A                                              | 1.21E-02 |
| 11 | 77  | 89 | 6  | Transmembrane Receptor Protein Tyrosine Kinase Signaling Pathway | 2.14E-05 | SHC1, PXN, PTK2B, FGFR4, ERBB2, CBLC                                                                     | 2.94E-03 |
| 11 | 71  | 89 | 6  | Regulation Of I Kappab Kinase Nf Kappab Cascade                  | 1.34E-05 | TNFRSF10B, CFLAR, TNFRSF1A, TICAM1, MYD88, FLNA                                                          | 2.21E-03 |
| 12 | 81  | 47 | 6  | Cell Migration                                                   | 6.62E-07 | LAMC1, ENPEP, LAMB1, ITGB1, MYH9, CD34                                                                   | 1.82E-04 |
| 13 | 20  | 91 | 3  | Meiosis I                                                        | 4.34E-04 | LIG3, RAD1, RAD51                                                                                        | 4.47E-02 |
| 13 | 99  | 91 | 9  | M Phase                                                          | 5.33E-08 | LIG3, PIN1, RAD1, NDC80, NEK2, RAD51, KIF11, BUB1, NCAPH                                                 | 2.20E-05 |

|    |     |    |    |                                                      |          |                                                                                                                                                     |          |
|----|-----|----|----|------------------------------------------------------|----------|-----------------------------------------------------------------------------------------------------------------------------------------------------|----------|
| 13 | 170 | 91 | 12 | Cell Cycle Process                                   | 5.10E-09 | LIG3, PIN1, FBXO5, RAD1, RACGAP1, NDC80, NEK2, RAD51, KIF23, KIF11, BUB1, NCAPH                                                                     | 4.21E-06 |
| 13 | 134 | 91 | 8  | Mitotic Cell Cycle                                   | 7.46E-06 | PIN1, FBXO5, NDC80, NEK2, KIF23, KIF11, BUB1, NCAPH                                                                                                 | 1.23E-03 |
| 13 | 153 | 91 | 9  | Cell Cycle Phase                                     | 2.20E-06 | LIG3, PIN1, RAD1, NDC80, NEK2, RAD51, KIF11, BUB1, NCAPH                                                                                            | 4.54E-04 |
| 13 | 70  | 91 | 6  | Mitosis                                              | 1.40E-05 | PIN1, NDC80, NEK2, KIF11, BUB1, NCAPH                                                                                                               | 1.93E-03 |
| 13 | 276 | 91 | 13 | Cell Cycle Go 0007049                                | 1.41E-07 | LIG3, PIN1, FBXO5, RAD1, RACGAP1, GPS1, NDC80, NEK2, RAD51, KIF23, KIF11, BUB1, NCAPH                                                               | 3.88E-05 |
| 13 | 72  | 91 | 6  | M Phase Of Mitotic Cell Cycle                        | 1.65E-05 | PIN1, NDC80, NEK2, KIF11, BUB1, NCAPH                                                                                                               | 1.95E-03 |
| 14 | 124 | 65 | 6  | Positive Regulation Of Cell Proliferation            | 5.31E-05 | VEGFA, NRP1, LAMC1, TIMP1, LAMB1, ANG                                                                                                               | 3.02E-02 |
| 14 | 81  | 65 | 5  | Cell Migration                                       | 7.32E-05 | NRP1, LAMC1, NRP2, LAMB1, ANG                                                                                                                       | 3.02E-02 |
| 16 | 234 | 93 | 15 | Dna Metabolic Process                                | 2.77E-10 | CDC6, CHEK1, RAD51, CDT1, POLQ, EXO1, RAD54L, BRCA2, LIG3, BRCA1, ORC1L, POLG2, POLD1, CDK2, FEN1                                                   | 2.28E-08 |
| 16 | 118 | 93 | 9  | Dna Repair                                           | 2.96E-07 | RAD51, POLQ, EXO1, RAD54L, BRCA2, LIG3, BRCA1, POLD1, FEN1                                                                                          | 1.22E-05 |
| 16 | 19  | 93 | 5  | Mitotic Cell Cycle Checkpoint                        | 2.63E-07 | CCNA2, BUB1, BUB1B, TTK, KNTC1                                                                                                                      | 1.14E-05 |
| 16 | 20  | 93 | 3  | Meiosis I                                            | 4.62E-04 | CHEK1, RAD51, LIG3                                                                                                                                  | 8.87E-03 |
| 16 | 18  | 93 | 3  | Regulation Of Dna Replication                        | 3.35E-04 | CDC6, CDT1, CDK2                                                                                                                                    | 6.73E-03 |
| 16 | 177 | 93 | 12 | Response To Endogenous Stimulus                      | 1.04E-08 | CCNA2, CHEK1, CHEK2, RAD51, POLQ, EXO1, RAD54L, BRCA2, LIG3, BRCA1, POLD1, FEN1                                                                     | 6.11E-07 |
| 16 | 99  | 93 | 22 | M Phase                                              | 0.00E+00 | CCNA2, KIF2C, ESPL1, NEK2, CHEK1, NCAPH, AURKA, BUB1, PLK1, RAD51, BUB1B, DDX11, RAD54L, LIG3, CDC25C, NDC80, KIF11, KIF15, TTK, KNTC1, TPX2, CENPE | 0.00E+00 |
| 16 | 74  | 93 | 4  | Microtubule Based Process                            | 2.54E-03 | KIF2C, KIF23, KIF11, TTK                                                                                                                            | 4.28E-02 |
| 16 | 20  | 93 | 5  | Dna Integrity Checkpoint                             | 3.49E-07 | CCNA2, CDC6, CHEK1, CHEK2, CDT1                                                                                                                     | 1.37E-05 |
| 16 | 33  | 93 | 7  | Regulation Of Mitosis                                | 4.73E-09 | CCNA2, NEK2, BUB1, BUB1B, CDC25C, TTK, KNTC1                                                                                                        | 3.25E-07 |
| 16 | 31  | 93 | 4  | Microtubule Cytoskeleton Organization And Biogenesis | 8.94E-05 | KIF2C, KIF23, KIF11, TTK                                                                                                                            | 2.38E-03 |
| 16 | 63  | 93 | 6  | Interphase                                           | 8.60E-06 | CDC6, DDX11, SKP2, CDC25C, POLD1, CDK2                                                                                                              | 2.84E-04 |



|    |     |    |    |                                                        |          |                                                                                                                                                                                            |          |
|----|-----|----|----|--------------------------------------------------------|----------|--------------------------------------------------------------------------------------------------------------------------------------------------------------------------------------------|----------|
| 16 | 170 | 93 | 28 | Cell Cycle Process                                     | 1.71E-14 | CCNA2, KIF2C, ESPL1, NEK2, CDC6, CHEK1, NCAPH, AURKA, BUB1, KIF23, PLK1, RAD51, BUB1B, DDX11, RAD54L, BRCA2, LIG3, SKP2, CDC25C, POLD1, NDC80, KIF11, KIF15, TTK, KNTC1, CDK2, TPX2, CENPE | 3.57E-12 |
| 16 | 15  | 93 | 5  | Mitotic Sister Chromatid Segregation                   | 6.96E-08 | ESPL1, NCAPH, DDX11, NDC80, CENPE                                                                                                                                                          | 3.59E-06 |
| 16 | 39  | 93 | 4  | Regulation Of Dna Metabolic Process                    | 2.23E-04 | CDC6, RAD51, CDT1, CDK2                                                                                                                                                                    | 4.84E-03 |
| 16 | 32  | 93 | 4  | Meiotic Cell Cycle                                     | 1.02E-04 | CHEK1, RAD51, RAD54L, LIG3                                                                                                                                                                 | 2.62E-03 |
| 16 | 134 | 93 | 23 | Mitotic Cell Cycle                                     | 4.22E-14 | CCNA2, KIF2C, ESPL1, NEK2, CDC6, NCAPH, AURKA, BUB1, KIF23, PLK1, BUB1B, DDX11, SKP2, CDC25C, POLD1, NDC80, KIF11, KIF15, TTK, KNTC1, CDK2, TPX2, CENPE                                    | 6.96E-12 |
| 16 | 153 | 93 | 26 | Cell Cycle Phase                                       | 1.73E-14 | CCNA2, KIF2C, ESPL1, NEK2, CDC6, CHEK1, NCAPH, AURKA, BUB1, PLK1, RAD51, BUB1B, DDX11, RAD54L, LIG3, SKP2, CDC25C, POLD1, NDC80, KIF11, KIF15, TTK, KNTC1, CDK2, TPX2, CENPE               | 3.57E-12 |
| 16 | 43  | 93 | 9  | Cell Cycle Checkpoint Go 0000075                       | 3.00E-11 | CCNA2, CDC6, CHEK1, BUB1, CHEK2, CDT1, BUB1B, TTK, KNTC1                                                                                                                                   | 3.10E-09 |
| 16 | 15  | 93 | 3  | Dna Replication Initiation                             | 1.90E-04 | CDC6, CDT1, ORC1L                                                                                                                                                                          | 4.35E-03 |
| 16 | 28  | 93 | 6  | Chromosome Segregation                                 | 5.92E-08 | ESPL1, NCAPH, DDX11, BRCA1, NDC80, CENPE                                                                                                                                                   | 3.26E-06 |
| 16 | 13  | 93 | 3  | G1 Phase Of Mitotic Cell Cycle                         | 1.21E-04 | CDC6, CDC25C, CDK2                                                                                                                                                                         | 3.01E-03 |
| 16 | 19  | 93 | 3  | Regulation Of Mitotic Cell Cycle                       | 3.95E-04 | CDC6, CDC25C, CDK2                                                                                                                                                                         | 7.76E-03 |
| 16 | 93  | 93 | 8  | Dna Replication                                        | 5.55E-07 | CDC6, RAD51, CDT1, EXO1, ORC1L, POLG2, POLD1, CDK2                                                                                                                                         | 2.08E-05 |
| 16 | 31  | 93 | 4  | Dna Damage Responsesignal Transduction                 | 8.94E-05 | CCNA2, CHEK1, CHEK2, BRCA1                                                                                                                                                                 | 2.38E-03 |
| 16 | 17  | 93 | 3  | Dna Damage Checkpoint                                  | 2.80E-04 | CCNA2, CHEK1, CHEK2                                                                                                                                                                        | 5.78E-03 |
| 16 | 39  | 93 | 4  | Regulation Of Cyclin Dependent Protein Kinase Activity | 2.23E-04 | CDC6, CHEK1, CDC25C, CDC25A                                                                                                                                                                | 4.84E-03 |
| 16 | 21  | 93 | 3  | Double Strand Break Repair                             | 5.36E-04 | RAD51, BRCA1, FEN1                                                                                                                                                                         | 1.01E-02 |
| 16 | 44  | 93 | 6  | Dna Recombination                                      | 1.00E-06 | CHEK1, RAD51, EXO1, RAD54L, LIG3, BRCA1                                                                                                                                                    | 3.60E-05 |
| 16 | 15  | 93 | 3  | G1 Phase                                               | 1.90E-04 | CDC6, CDC25C, CDK2                                                                                                                                                                         | 4.35E-03 |
| 16 | 8   | 93 | 3  | Mitotic Spindle Organization And Biogenesis            | 2.43E-05 | KIF23, KIF11, TTK                                                                                                                                                                          | 7.71E-04 |
| 16 | 17  | 93 | 3  | Meiotic Recombination                                  | 2.80E-04 | CHEK1, RAD51, LIG3                                                                                                                                                                         | 5.78E-03 |

|    |     |    |    |                                                        |          |                                                                                                                                                                                                                        |          |
|----|-----|----|----|--------------------------------------------------------|----------|------------------------------------------------------------------------------------------------------------------------------------------------------------------------------------------------------------------------|----------|
| 16 | 70  | 93 | 18 | Mitosis                                                | 1.13E-14 | CCNA2, KIF2C, ESPL1, NEK2, NCAPH, AURKA, BUB1, PLK1, BUB1B, DDX11, CDC25C, NDC80, KIF11, KIF15, TTK, KNTC1, TPX2, CENPE                                                                                                | 3.57E-12 |
| 16 | 276 | 93 | 32 | Cell Cycle Go 0007049                                  | 9.88E-14 | CCNA2, KIF2C, ESPL1, NEK2, CDC6, CHEK1, NCAPH, AURKA, BUB1, KIF23, CHEK2, PLK1, RAD51, CDT1, BUB1B, DDX11, RAD54L, BRCA2, LIG3, SKP2, CDC25C, POLD1, NDC80, KIF11, KIF15, TTK, KNTC1, CDK2, TPX2, CDC20, CDC25A, CENPE | 1.16E-11 |
| 16 | 16  | 93 | 5  | Sister Chromatid Segregation                           | 1.01E-07 | ESPL1, NCAPH, DDX11, NDC80, CENPE                                                                                                                                                                                      | 4.89E-06 |
| 16 | 105 | 93 | 5  | Chromosome Organization And Biogenesis                 | 1.30E-03 | ESPL1, NCAPH, DDX11, NDC80, CENPE                                                                                                                                                                                      | 2.32E-02 |
| 16 | 51  | 93 | 7  | Dna Dependent Dna Replication                          | 1.14E-07 | CDC6, RAD51, CDT1, EXO1, ORC1L, POLG2, CDK2                                                                                                                                                                            | 5.25E-06 |
| 16 | 57  | 93 | 6  | Interphase Of Mitotic Cell Cycle                       | 4.77E-06 | CDC6, DDX11, SKP2, CDC25C, POLD1, CDK2                                                                                                                                                                                 | 1.64E-04 |
| 16 | 9   | 93 | 3  | Spindle Organization And Biogenesis                    | 3.62E-05 | KIF23, KIF11, TTK                                                                                                                                                                                                      | 1.11E-03 |
| 16 | 150 | 93 | 12 | Response To Dna Damage Stimulus                        | 1.57E-09 | CCNA2, CHEK1, CHEK2, RAD51, POLQ, EXO1, RAD54L, BRCA2, LIG3, BRCA1, POLD1, FEN1                                                                                                                                        | 1.18E-07 |
| 16 | 157 | 93 | 13 | Regulation Of Cell Cycle                               | 2.02E-10 | CCNA2, NEK2, CDC6, CHEK1, BUB1, CHEK2, CDT1, BUB1B, CDC25C, TTK, KNTC1, CDK2, CDC25A                                                                                                                                   | 1.85E-08 |
| 16 | 72  | 93 | 18 | M Phase Of Mitotic Cell Cycle                          | 6.15E-14 | CCNA2, KIF2C, ESPL1, NEK2, NCAPH, AURKA, BUB1, PLK1, BUB1B, DDX11, CDC25C, NDC80, KIF11, KIF15, TTK, KNTC1, TPX2, CENPE                                                                                                | 8.46E-12 |
| 19 | 146 | 48 | 6  | Synaptic Transmission                                  | 2.31E-05 | SYN1, GAD2, NPY, SYN2, SYT1, RAB3A                                                                                                                                                                                     | 6.36E-03 |
| 19 | 23  | 48 | 4  | Generation Of A Signal Involved In Cell Cell Signaling | 1.86E-06 | SYT1, RAB3A, SNAP25, STX1A                                                                                                                                                                                             | 1.54E-03 |
| 19 | 159 | 48 | 6  | Transmission Of Nerve Impulse                          | 3.74E-05 | SYN1, GAD2, NPY, SYN2, SYT1, RAB3A                                                                                                                                                                                     | 7.72E-03 |
| 20 | 146 | 74 | 11 | Synaptic Transmission                                  | 1.24E-09 | SYT1, SYN1, CPNE6, DOC2A, SYN2, HTR2A, RAB3A, NPY, BSN, HTR1E, GAD2                                                                                                                                                    | 1.02E-06 |
| 20 | 23  | 74 | 3  | Generation Of A Signal Involved In Cell Cell Signaling | 3.61E-04 | SNAP25, SYT1, RAB3A                                                                                                                                                                                                    | 4.97E-02 |
| 20 | 159 | 74 | 11 | Transmission Of Nerve Impulse                          | 3.07E-09 | SYT1, SYN1, CPNE6, DOC2A, SYN2, HTR2A, RAB3A, NPY, BSN, HTR1E, GAD2                                                                                                                                                    | 1.27E-06 |
| 21 | 236 | 70 | 8  | Protein Kinase Cascade                                 | 6.40E-05 | ADAM9, FLNA, LGALS1, CXCR4, C5AR1, NMI, SHC1, TNFRSF10B                                                                                                                                                                | 2.64E-02 |

|    |     |     |    |                                                              |          |                                                                                                         |          |
|----|-----|-----|----|--------------------------------------------------------------|----------|---------------------------------------------------------------------------------------------------------|----------|
| 21 | 269 | 70  | 9  | Response To External Stimulus                                | 2.39E-05 | PLAU, PTX3, IL1RAP, SERPINE1, PLAUR, CXCR4, CDKN1A, C5AR1, NMI                                          | 1.97E-02 |
| 25 | 26  | 75  | 3  | Negative Regulation Of Multicellular Organismal Process      | 5.44E-04 | TGFB2, SERPINE1, SRGN                                                                                   | 4.48E-02 |
| 25 | 26  | 75  | 3  | Jak Stat Cascade                                             | 5.44E-04 | STAT3, SOCS3, HCLS1                                                                                     | 4.48E-02 |
| 25 | 207 | 75  | 7  | Immune Response                                              | 2.96E-04 | TREM1, LTF, TGFB2, C5AR1, LCP2, FCGR2B, FTH1                                                            | 4.48E-02 |
| 25 | 290 | 75  | 8  | Immune System Process                                        | 4.28E-04 | TREM1, LTF, TGFB2, C5AR1, LCP2, FCGR2B, FTH1, HCLS1                                                     | 4.48E-02 |
| 26 | 18  | 119 | 4  | Axon Guidance                                                | 2.49E-05 | CDK5R1, SLIT1, NRXN1, SIAH1                                                                             | 5.14E-03 |
| 26 | 41  | 119 | 5  | Neurite Development                                          | 4.88E-05 | MAPT, CDK5R1, SLIT1, NRXN1, SIAH1                                                                       | 5.76E-03 |
| 26 | 74  | 119 | 6  | Microtubule Based Process                                    | 8.79E-05 | MAPT, KIF1B, CLASP2, NLGN1, APC, ARHGEF10L                                                              | 8.69E-03 |
| 26 | 33  | 119 | 5  | Axonogenesis                                                 | 1.65E-05 | MAPT, CDK5R1, SLIT1, NRXN1, SIAH1                                                                       | 5.14E-03 |
| 26 | 38  | 119 | 5  | Cellular Morphogenesis During Differentiation                | 3.35E-05 | MAPT, CDK5R1, SLIT1, NRXN1, SIAH1                                                                       | 5.53E-03 |
| 26 | 65  | 119 | 6  | Generation Of Neurons                                        | 4.21E-05 | MAPT, CDK5R1, NLGN1, SLIT1, NRXN1, SIAH1                                                                | 5.76E-03 |
| 26 | 103 | 119 | 6  | Regulation Of Cellular Component Organization And Biogenesis | 5.38E-04 | MAPT, CLASP2, APC, ARHGEF10L, TERF2, EIF4G3                                                             | 3.17E-02 |
| 26 | 35  | 119 | 5  | Regulation Of Organelle Organization And Biogenesis          | 2.22E-05 | MAPT, CLASP2, APC, ARHGEF10L, TERF2                                                                     | 5.14E-03 |
| 26 | 70  | 119 | 5  | Cell Cell Adhesion                                           | 6.28E-04 | CYFIP2, CDK5R1, NLGN1, CLDN4, COL13A1                                                                   | 3.24E-02 |
| 26 | 75  | 119 | 6  | Neurogenesis                                                 | 9.48E-05 | MAPT, CDK5R1, NLGN1, SLIT1, NRXN1, SIAH1                                                                | 8.69E-03 |
| 26 | 26  | 119 | 4  | Regulation Of Cytoskeleton Organization And Biogenesis       | 1.15E-04 | MAPT, CLASP2, APC, ARHGEF10L                                                                            | 8.75E-03 |
| 26 | 58  | 119 | 6  | Neuron Differentiation                                       | 2.18E-05 | MAPT, CDK5R1, NLGN1, SLIT1, NRXN1, SIAH1                                                                | 5.14E-03 |
| 26 | 49  | 119 | 5  | Neuron Development                                           | 1.17E-04 | MAPT, CDK5R1, SLIT1, NRXN1, SIAH1                                                                       | 8.75E-03 |
| 26 | 11  | 119 | 3  | Microtubule Polymerization Or Depolymerization               | 1.47E-04 | MAPT, CLASP2, APC                                                                                       | 1.01E-02 |
| 27 | 19  | 53  | 4  | Mitotic Cell Cycle Checkpoint                                | 1.23E-06 | CCNA2, TTK, MAD2L1, BUB1B                                                                               | 4.63E-05 |
| 27 | 13  | 53  | 4  | Cytokinesis                                                  | 2.32E-07 | BIRC5, NUSAP1, PRC1, RACGAP1                                                                            | 1.37E-05 |
| 27 | 99  | 53  | 15 | M Phase                                                      | 0.00E+00 | BIRC5, NDC80, NUSAP1, CENPE, CCNA2, KIF2C, TTK, KIF11, TPX2, AURKA, UBE2C, RAD51, MAD2L1, BUB1B, CDC25C | 0.00E+00 |
| 27 | 74  | 53  | 7  | Microtubule Based Process                                    | 3.05E-08 | NUSAP1, PRC1, KIF2C, TTK, KIF11, KIF4A, KIF23                                                           | 2.29E-06 |
| 27 | 33  | 53  | 8  | Regulation Of Mitosis                                        | 9.43E-13 | BIRC5, NUSAP1, CCNA2, TTK, UBE2C, MAD2L1, BUB1B, CDC25C                                                 | 9.73E-11 |
| 27 | 31  | 53  | 6  | Microtubule Cytoskeleton Organization And Biogenesis         | 3.67E-09 | NUSAP1, PRC1, KIF2C, TTK, KIF11, KIF23                                                                  | 3.37E-07 |

|    |     |    |    |                                             |          |                                                                                                                                                   |          |
|----|-----|----|----|---------------------------------------------|----------|---------------------------------------------------------------------------------------------------------------------------------------------------|----------|
| 27 | 170 | 53 | 19 | Cell Cycle Process                          | 0.00E+00 | BIRC5, NDC80, NUSAP1, CENPE, CENPF, CCNA2, PRC1, KIF2C, TTK, KIF11, TPX2, AURKA, RACGAP1, UBE2C, RAD51, MAD2L1, BUB1B, CDC25C, KIF23              | 0.00E+00 |
| 27 | 15  | 53 | 3  | Mitotic Sister Chromatid Segregation        | 3.53E-05 | NDC80, NUSAP1, CENPE                                                                                                                              | 1.27E-03 |
| 27 | 134 | 53 | 17 | Mitotic Cell Cycle                          | 0.00E+00 | BIRC5, NDC80, NUSAP1, CENPE, CENPF, CCNA2, PRC1, KIF2C, TTK, KIF11, TPX2, AURKA, UBE2C, MAD2L1, BUB1B, CDC25C, KIF23                              | 0.00E+00 |
| 27 | 153 | 53 | 16 | Cell Cycle Phase                            | 0.00E+00 | BIRC5, NDC80, NUSAP1, CENPE, CENPF, CCNA2, KIF2C, TTK, KIF11, TPX2, AURKA, UBE2C, RAD51, MAD2L1, BUB1B, CDC25C                                    | 0.00E+00 |
| 27 | 43  | 53 | 5  | Cell Cycle Checkpoint Go 0000075            | 1.15E-06 | BIRC5, CCNA2, TTK, MAD2L1, BUB1B                                                                                                                  | 4.63E-05 |
| 27 | 28  | 53 | 5  | Chromosome Segregation                      | 1.24E-07 | NDC80, NUSAP1, CENPE, CENPF, TOP2A                                                                                                                | 7.86E-06 |
| 27 | 15  | 53 | 4  | Establishment Of Organelle Localization     | 4.40E-07 | BIRC5, NUSAP1, CENPE, CENPF                                                                                                                       | 2.14E-05 |
| 27 | 15  | 53 | 4  | Cell Division                               | 4.40E-07 | BIRC5, NUSAP1, PRC1, RACGAP1                                                                                                                      | 2.14E-05 |
| 27 | 8   | 53 | 4  | Mitotic Spindle Organization And Biogenesis | 2.31E-08 | PRC1, TTK, KIF11, KIF23                                                                                                                           | 1.91E-06 |
| 27 | 70  | 53 | 14 | Mitosis                                     | 0.00E+00 | BIRC5, NDC80, NUSAP1, CENPE, CCNA2, KIF2C, TTK, KIF11, TPX2, AURKA, UBE2C, MAD2L1, BUB1B, CDC25C                                                  | 0.00E+00 |
| 27 | 276 | 53 | 21 | Cell Cycle Go 0007049                       | 0.00E+00 | BIRC5, NDC80, NUSAP1, CENPE, CENPF, CCNA2, PRC1, KIF2C, TTK, KIF11, TPX2, AURKA, RACGAP1, UBE2C, CDC20, MCM2, RAD51, MAD2L1, BUB1B, CDC25C, KIF23 | 0.00E+00 |
| 27 | 16  | 53 | 3  | Sister Chromatid Segregation                | 4.33E-05 | NDC80, NUSAP1, CENPE                                                                                                                              | 1.49E-03 |
| 27 | 19  | 53 | 4  | Organelle Localization                      | 1.23E-06 | BIRC5, NUSAP1, CENPE, CENPF                                                                                                                       | 4.63E-05 |
| 27 | 181 | 53 | 8  | Cytoskeleton Organization And Biogenesis    | 1.11E-06 | NUSAP1, PRC1, KIF2C, TTK, KIF11, RACGAP1, KIF4A, KIF23                                                                                            | 4.63E-05 |
| 27 | 105 | 53 | 4  | Chromosome Organization And Biogenesis      | 1.15E-03 | NDC80, NUSAP1, CENPE, TOP2A                                                                                                                       | 3.65E-02 |
| 27 | 9   | 53 | 4  | Spindle Organization And Biogenesis         | 4.15E-08 | PRC1, TTK, KIF11, KIF23                                                                                                                           | 2.85E-06 |
| 27 | 157 | 53 | 8  | Regulation Of Cell Cycle                    | 3.76E-07 | BIRC5, NUSAP1, CCNA2, TTK, UBE2C, MAD2L1, BUB1B, CDC25C                                                                                           | 2.07E-05 |
| 27 | 72  | 53 | 14 | M Phase Of Mitotic Cell Cycle               | 0.00E+00 | BIRC5, NDC80, NUSAP1, CENPE, CCNA2, KIF2C, TTK, KIF11, TPX2, AURKA, UBE2C, MAD2L1, BUB1B, CDC25C                                                  | 0.00E+00 |
| 28 | 128 | 55 | 6  | Behavior                                    | 2.43E-05 | ITGB2, PLAUR, RNASE2, CXCR4, SYK, C5AR1                                                                                                           | 6.67E-03 |

|    |     |    |    |                                                             |          |                                                                    |          |
|----|-----|----|----|-------------------------------------------------------------|----------|--------------------------------------------------------------------|----------|
| 28 | 80  | 55 | 6  | Locomotory Behavior                                         | 1.59E-06 | ITGB2, PLAUR, RNASE2, CXCR4, SYK, C5AR1                            | 6.56E-04 |
| 28 | 261 | 55 | 7  | Response To Chemical Stimulus                               | 1.73E-04 | ITGB2, GNAI2, PLAUR, RNASE2, CXCR4, SYK, C5AR1                     | 2.86E-02 |
| 28 | 290 | 55 | 8  | Immune System Process                                       | 4.68E-05 | ITGB2, TGFB1, FCGR2B, CXCR4, CTSS, CD4, SYK, C5AR1                 | 9.65E-03 |
| 28 | 269 | 55 | 10 | Response To External Stimulus                               | 3.16E-07 | ITGB2, TGFB1, GNAI2, F13A1, PLAUR, RNASE2, CXCR4, CYBB, SYK, C5AR1 | 2.60E-04 |
| 29 | 99  | 30 | 6  | M Phase                                                     | 1.34E-07 | KIF15, BUB1B, KIF2C, NEK2, BIRC5, TTK                              | 1.38E-05 |
| 29 | 33  | 30 | 4  | Regulation Of Mitosis                                       | 1.22E-06 | BUB1B, NEK2, BIRC5, TTK                                            | 1.00E-04 |
| 29 | 63  | 30 | 4  | Interphase                                                  | 1.68E-05 | CDC7, CDKN2C, BIRC5, CDKN3                                         | 1.16E-03 |
| 29 | 170 | 30 | 9  | Cell Cycle Process                                          | 2.00E-10 | CDC7, CDKN2C, KIF15, BUB1B, KIF2C, NEK2, BIRC5, CDKN3, TTK         | 5.49E-08 |
| 29 | 134 | 30 | 9  | Mitotic Cell Cycle                                          | 2.35E-11 | CDC7, CDKN2C, KIF15, BUB1B, KIF2C, NEK2, BIRC5, CDKN3, TTK         | 1.93E-08 |
| 29 | 153 | 30 | 9  | Cell Cycle Phase                                            | 7.76E-11 | CDC7, CDKN2C, KIF15, BUB1B, KIF2C, NEK2, BIRC5, CDKN3, TTK         | 3.20E-08 |
| 29 | 43  | 30 | 3  | Cell Cycle Checkpoint Go 0000075                            | 1.61E-04 | BUB1B, BIRC5, TTK                                                  | 9.49E-03 |
| 29 | 70  | 30 | 6  | Mitosis                                                     | 1.65E-08 | KIF15, BUB1B, KIF2C, NEK2, BIRC5, TTK                              | 2.69E-06 |
| 29 | 276 | 30 | 10 | Cell Cycle Go 0007049                                       | 6.82E-10 | CDC7, CDKN2C, KIF15, BUB1B, KIF2C, NEK2, BIRC5, CDKN3, TTK, MCM2   | 1.41E-07 |
| 29 | 57  | 30 | 4  | Interphase Of Mitotic Cell Cycle                            | 1.13E-05 | CDC7, CDKN2C, BIRC5, CDKN3                                         | 8.46E-04 |
| 29 | 157 | 30 | 7  | Regulation Of Cell Cycle                                    | 8.86E-08 | CDC7, CDKN2C, BUB1B, NEK2, BIRC5, CDKN3, TTK                       | 1.04E-05 |
| 29 | 72  | 30 | 6  | M Phase Of Mitotic Cell Cycle                               | 1.96E-08 | KIF15, BUB1B, KIF2C, NEK2, BIRC5, TTK                              | 2.69E-06 |
| 29 | 23  | 30 | 3  | G1 S Transition Of Mitotic Cell Cycle                       | 2.39E-05 | CDC7, CDKN2C, CDKN3                                                | 1.52E-03 |
| 32 | 46  | 71 | 4  | Nuclear Import                                              | 1.50E-04 | TPR, KPNB1, KPNA6, RANBP2                                          | 2.18E-02 |
| 32 | 249 | 71 | 7  | Macromolecular Complex Assembly                             | 6.40E-04 | SMARCA5, EIF3B, MED1, EIF3A, EIF4G3, SFRS2IP, NCOA6                | 4.06E-02 |
| 32 | 34  | 71 | 3  | Translational Initiation                                    | 1.03E-03 | EIF3B, EIF3A, EIF4G3                                               | 4.73E-02 |
| 32 | 77  | 71 | 5  | Nuclear Transport                                           | 8.78E-05 | TPR, KHDRBS1, KPNB1, KPNA6, RANBP2                                 | 2.18E-02 |
| 32 | 56  | 71 | 4  | Protein Import                                              | 3.23E-04 | TPR, KPNB1, KPNA6, RANBP2                                          | 2.67E-02 |
| 32 | 32  | 71 | 3  | Transcription Initiation                                    | 8.62E-04 | SMARCA5, MED1, NCOA6                                               | 4.58E-02 |
| 32 | 263 | 71 | 8  | Regulation Of Transcription From Rna Polymerase Ii Promoter | 1.51E-04 | SMARCA5, DNMT1, CHD4, MED1, NCOA6, CHD1, MAML1, DEK                | 2.18E-02 |
| 32 | 69  | 71 | 4  | Ribonucleoprotein Complex Biogenesis And Assembly           | 7.18E-04 | EIF3B, EIF3A, EIF4G3, SFRS2IP                                      | 4.23E-02 |
| 32 | 44  | 71 | 4  | Protein Import Into Nucleus                                 | 1.26E-04 | TPR, KPNB1, KPNA6, RANBP2                                          | 2.18E-02 |

|    |     |    |    |                                                      |          |                                                                                                                                |          |
|----|-----|----|----|------------------------------------------------------|----------|--------------------------------------------------------------------------------------------------------------------------------|----------|
| 32 | 56  | 71 | 4  | Protein Rna Complex Assembly                         | 3.23E-04 | EIF3B, EIF3A, EIF4G3, SFRS2IP                                                                                                  | 2.67E-02 |
| 32 | 266 | 71 | 7  | Cellular Component Assembly                          | 9.44E-04 | SMARCA5, EIF3B, MED1, EIF3A, EIF4G3, SFRS2IP, NCOA6                                                                            | 4.58E-02 |
| 32 | 201 | 71 | 6  | Macromolecule Localization                           | 1.17E-03 | HNRNPA2B1, TPR, KHDRBS1, KPNB1, KPNA6, RANBP2                                                                                  | 4.96E-02 |
| 32 | 77  | 71 | 5  | Nucleocytoplasmic Transport                          | 8.78E-05 | TPR, KHDRBS1, KPNB1, KPNA6, RANBP2                                                                                             | 2.18E-02 |
| 34 | 234 | 27 | 7  | Dna Metabolic Process                                | 6.10E-07 | NASP, NOL8, SMC1A, DNMT1, ATF7IP, RFC1, TLK2                                                                                   | 5.03E-04 |
| 34 | 105 | 27 | 4  | Chromosome Organization And Biogenesis               | 8.21E-05 | NASP, SMC1A, RFC1, TLK2                                                                                                        | 2.26E-02 |
| 37 | 19  | 48 | 5  | Mitotic Cell Cycle Checkpoint                        | 9.06E-09 | BUB1, TTK, CCNA2, BUB1B, MAD2L1                                                                                                | 6.79E-07 |
| 37 | 99  | 48 | 15 | M Phase                                              | 1.97E-14 | CHEK1, NCAPH, RAD54L, KIF15, BUB1, TTK, KIF2C, CCNA2, BIRC5, NEK2, KIF11, BUB1B, CENPE, MAD2L1, TPX2                           | 2.70E-12 |
| 37 | 74  | 48 | 5  | Microtubule Based Process                            | 1.07E-05 | KIF23, KIF4A, TTK, KIF2C, KIF11                                                                                                | 5.17E-04 |
| 37 | 20  | 48 | 3  | Dna Integrity Checkpoint                             | 6.46E-05 | CDC6, CHEK1, CCNA2                                                                                                             | 2.54E-03 |
| 37 | 33  | 48 | 7  | Regulation Of Mitosis                                | 4.00E-11 | BUB1, TTK, CCNA2, BIRC5, NEK2, BUB1B, MAD2L1                                                                                   | 3.67E-09 |
| 37 | 31  | 48 | 4  | Microtubule Cytoskeleton Organization And Biogenesis | 6.46E-06 | KIF23, TTK, KIF2C, KIF11                                                                                                       | 3.33E-04 |
| 37 | 63  | 48 | 4  | Interphase                                           | 1.11E-04 | CDC6, CDK2, BIRC5, CENPF                                                                                                       | 4.00E-03 |
| 37 | 170 | 48 | 19 | Cell Cycle Process                                   | 2.63E-14 | CDC6, CHEK1, NCAPH, CDK2, KIF23, RAD54L, KIF15, BUB1, TTK, KIF2C, CCNA2, BIRC5, NEK2, KIF11, CENPF, BUB1B, CENPE, MAD2L1, TPX2 | 3.10E-12 |
| 37 | 134 | 48 | 17 | Mitotic Cell Cycle                                   | 0.00E+00 | CDC6, NCAPH, CDK2, KIF23, KIF15, BUB1, TTK, KIF2C, CCNA2, BIRC5, NEK2, KIF11, CENPF, BUB1B, CENPE, MAD2L1, TPX2                | 0.00E+00 |
| 37 | 153 | 48 | 18 | Cell Cycle Phase                                     | 0.00E+00 | CDC6, CHEK1, NCAPH, CDK2, RAD54L, KIF15, BUB1, TTK, KIF2C, CCNA2, BIRC5, NEK2, KIF11, CENPF, BUB1B, CENPE, MAD2L1, TPX2        | 0.00E+00 |
| 37 | 43  | 48 | 8  | Cell Cycle Checkpoint Go 0000075                     | 4.52E-12 | CDC6, CHEK1, BUB1, TTK, CCNA2, BIRC5, BUB1B, MAD2L1                                                                            | 4.66E-10 |
| 37 | 28  | 48 | 4  | Chromosome Segregation                               | 4.24E-06 | NCAPH, BRCA1, CENPF, CENPE                                                                                                     | 2.50E-04 |
| 37 | 15  | 48 | 3  | Establishment Of Organelle Localization              | 2.62E-05 | BIRC5, CENPF, CENPE                                                                                                            | 1.20E-03 |
| 37 | 19  | 48 | 3  | Regulation Of Mitotic Cell Cycle                     | 5.51E-05 | CDC6, CDK2, BIRC5                                                                                                              | 2.27E-03 |
| 37 | 31  | 48 | 3  | Dna Damage Responsesignal Transduction               | 2.47E-04 | CHEK1, BRCA1, CCNA2                                                                                                            | 8.15E-03 |

|    |     |    |    |                                                                                          |          |                                                                                                                                |          |
|----|-----|----|----|------------------------------------------------------------------------------------------|----------|--------------------------------------------------------------------------------------------------------------------------------|----------|
| 37 | 44  | 48 | 3  | Dna Recombination                                                                        | 7.02E-04 | CHEK1, RAD54L, BRCA1                                                                                                           | 2.23E-02 |
| 37 | 8   | 48 | 3  | Mitotic Spindle Organization And Biogenesis                                              | 3.28E-06 | KIF23, TTK, KIF11                                                                                                              | 2.08E-04 |
| 37 | 70  | 48 | 13 | Mitosis                                                                                  | 0.00E+00 | NCAPH, KIF15, BUB1, TTK, KIF2C, CCNA2, BIRC5, NEK2, KIF11, BUB1B, CENPE, MAD2L1, TPX2                                          | 0.00E+00 |
| 37 | 276 | 48 | 19 | Cell Cycle Go 0007049                                                                    | 7.77E-15 | CDC6, CHEK1, NCAPH, CDK2, KIF23, RAD54L, KIF15, BUB1, TTK, KIF2C, CCNA2, BIRC5, NEK2, KIF11, CENPF, BUB1B, CENPE, MAD2L1, TPX2 | 1.28E-12 |
| 37 | 19  | 48 | 3  | Organelle Localization                                                                   | 5.51E-05 | BIRC5, CENPF, CENPE                                                                                                            | 2.27E-03 |
| 37 | 181 | 48 | 5  | Cytoskeleton Organization And Biogenesis                                                 | 7.36E-04 | KIF23, KIF4A, TTK, KIF2C, KIF11                                                                                                | 2.25E-02 |
| 37 | 57  | 48 | 4  | Interphase Of Mitotic Cell Cycle                                                         | 7.52E-05 | CDC6, CDK2, BIRC5, CENPF                                                                                                       | 2.82E-03 |
| 37 | 9   | 48 | 3  | Spindle Organization And Biogenesis                                                      | 4.91E-06 | KIF23, TTK, KIF11                                                                                                              | 2.70E-04 |
| 37 | 157 | 48 | 10 | Regulation Of Cell Cycle                                                                 | 4.55E-10 | CDC6, CHEK1, CDK2, BUB1, TTK, CCNA2, BIRC5, NEK2, BUB1B, MAD2L1                                                                | 3.75E-08 |
| 37 | 72  | 48 | 13 | M Phase Of Mitotic Cell Cycle                                                            | 0.00E+00 | NCAPH, KIF15, BUB1, TTK, KIF2C, CCNA2, BIRC5, NEK2, KIF11, BUB1B, CENPE, MAD2L1, TPX2                                          | 0.00E+00 |
| 38 | 11  | 52 | 3  | Microtubule Polymerization Or Depolymerization                                           | 1.22E-05 | MAPT, CLASP2, APC                                                                                                              | 1.01E-02 |
| 39 | 41  | 42 | 3  | Neurite Development                                                                      | 3.84E-04 | MAPT, NRXN1, CDK5R1                                                                                                            | 3.96E-02 |
| 39 | 33  | 42 | 3  | Axonogenesis                                                                             | 2.00E-04 | MAPT, NRXN1, CDK5R1                                                                                                            | 3.30E-02 |
| 39 | 18  | 42 | 3  | Regulation Of Mapkkk Cascade                                                             | 3.10E-05 | MAPK8IP3, TAOK3, HIPK2                                                                                                         | 6.40E-03 |
| 39 | 38  | 42 | 3  | Cellular Morphogenesis During Differentiation                                            | 3.06E-04 | MAPT, NRXN1, CDK5R1                                                                                                            | 3.60E-02 |
| 39 | 43  | 42 | 4  | Jnk Cascade                                                                              | 1.43E-05 | MAPK8IP3, TAOK3, MAPK10, HIPK2                                                                                                 | 4.31E-03 |
| 39 | 12  | 42 | 3  | Regulation Of Jnk Cascade                                                                | 8.49E-06 | MAPK8IP3, TAOK3, HIPK2                                                                                                         | 4.31E-03 |
| 39 | 89  | 42 | 4  | Mapkkk Cascade Go 0000165                                                                | 2.52E-04 | MAPK8IP3, TAOK3, MAPK10, HIPK2                                                                                                 | 3.46E-02 |
| 39 | 44  | 42 | 4  | Stress Activated Protein Kinase Signaling Pathway                                        | 1.57E-05 | MAPK8IP3, TAOK3, MAPK10, HIPK2                                                                                                 | 4.31E-03 |
| 40 | 234 | 84 | 19 | Dna Metabolic Process                                                                    | 1.29E-13 | TOP2A, NASP, FANCC, CDT1, EXO1, MSH5, RAD54L, POLD1, CHEK1, BRCA2, BRCA1, MCM2, MCM7, CDK2, TLK2, FEN1, MCM3, RFC4, DNMT1      | 1.52E-11 |
| 40 | 118 | 84 | 8  | Dna Repair                                                                               | 1.57E-06 | FANCC, EXO1, MSH5, RAD54L, POLD1, BRCA2, BRCA1, FEN1                                                                           | 5.18E-05 |
| 40 | 19  | 84 | 4  | Mitotic Cell Cycle Checkpoint                                                            | 7.88E-06 | BUB1, KNTC1, BUB1B, TTK                                                                                                        | 2.32E-04 |
| 40 | 182 | 84 | 6  | Negative Regulation Of Nucleobasenucleosidenucleotide And Nucleic Acid Metabolic Process | 1.68E-03 | TIMELESS, CDT1, BRCA1, CENPF, ILF3, DNMT1                                                                                      | 3.30E-02 |
| 40 | 177 | 84 | 10 | Response To Endogenous Stimulus                                                          | 3.94E-07 | FANCC, EXO1, MSH5, RAD54L, POLD1, CHEK1, BRCA2, BRCA1, MCM7, FEN1                                                              | 1.55E-05 |

|    |     |    |    |                                                      |          |                                                                                                                                                                 |          |
|----|-----|----|----|------------------------------------------------------|----------|-----------------------------------------------------------------------------------------------------------------------------------------------------------------|----------|
| 40 | 99  | 84 | 15 | M Phase                                              | 7.88E-14 | KIF15, NCAPH, BUB1, KNTC1, MSH5, RAD54L, KIF11, CHEK1, KIF2C, TPX2, BUB1B, SMC3, NDC80, TTK, PLK1                                                               | 1.52E-11 |
| 40 | 74  | 84 | 8  | Microtubule Based Process                            | 4.14E-08 | KIF11, KIF2C, KIF4A, SMC3, KIF5B, TTK, TUBG1, PRC1                                                                                                              | 2.14E-06 |
| 40 | 33  | 84 | 4  | Regulation Of Mitosis                                | 7.73E-05 | BUB1, KNTC1, BUB1B, TTK                                                                                                                                         | 1.93E-03 |
| 40 | 31  | 84 | 6  | Microtubule Cytoskeleton Organization And Biogenesis | 6.16E-08 | KIF11, KIF2C, SMC3, TTK, TUBG1, PRC1                                                                                                                            | 2.99E-06 |
| 40 | 63  | 84 | 6  | Interphase                                           | 4.76E-06 | TIMELESS, SKP2, POLD1, CDK2, CENPF, CDC7                                                                                                                        | 1.45E-04 |
| 40 | 170 | 84 | 24 | Cell Cycle Process                                   | 1.23E-13 | KIF15, NCAPH, BUB1, TIMELESS, KNTC1, MSH5, RAD54L, SKP2, POLD1, KIF11, CHEK1, BRCA2, KIF2C, TPX2, CDK2, CENPF, BUB1B, SMC3, CDC7, NDC80, TTK, TUBG1, PRC1, PLK1 | 1.52E-11 |
| 40 | 39  | 84 | 3  | Regulation Of Dna Metabolic Process                  | 2.50E-03 | CDT1, CDK2, TLK2                                                                                                                                                | 4.63E-02 |
| 40 | 32  | 84 | 5  | Meiotic Cell Cycle                                   | 2.54E-06 | MSH5, RAD54L, CHEK1, SMC3, TUBG1                                                                                                                                | 8.07E-05 |
| 40 | 134 | 84 | 18 | Mitotic Cell Cycle                                   | 6.54E-14 | KIF15, NCAPH, BUB1, KNTC1, SKP2, POLD1, KIF11, KIF2C, TPX2, CDK2, CENPF, BUB1B, SMC3, CDC7, NDC80, TTK, PRC1, PLK1                                              | 1.52E-11 |
| 40 | 153 | 84 | 21 | Cell Cycle Phase                                     | 9.08E-14 | KIF15, NCAPH, BUB1, TIMELESS, KNTC1, MSH5, RAD54L, SKP2, POLD1, KIF11, CHEK1, KIF2C, TPX2, CDK2, CENPF, BUB1B, SMC3, CDC7, NDC80, TTK, PLK1                     | 1.52E-11 |
| 40 | 13  | 84 | 3  | S Phase                                              | 8.90E-05 | TIMELESS, POLD1, CDC7                                                                                                                                           | 2.16E-03 |
| 40 | 43  | 84 | 7  | Cell Cycle Checkpoint Go 0000075                     | 1.64E-08 | CCNE2, BUB1, KNTC1, CDT1, CHEK1, BUB1B, TTK                                                                                                                     | 9.48E-07 |
| 40 | 28  | 84 | 5  | Chromosome Segregation                               | 1.27E-06 | TOP2A, NCAPH, BRCA1, CENPF, NDC80                                                                                                                               | 4.55E-05 |
| 40 | 93  | 84 | 10 | Dna Replication                                      | 7.95E-10 | NASP, CDT1, EXO1, MSH5, POLD1, MCM2, MCM7, CDK2, MCM3, RFC4                                                                                                     | 6.56E-08 |
| 40 | 44  | 84 | 5  | Dna Recombination                                    | 1.28E-05 | EXO1, MSH5, RAD54L, CHEK1, BRCA1                                                                                                                                | 3.65E-04 |
| 40 | 8   | 84 | 4  | Mitotic Spindle Organization And Biogenesis          | 1.51E-07 | KIF11, SMC3, TTK, PRC1                                                                                                                                          | 6.23E-06 |
| 40 | 70  | 84 | 12 | Mitosis                                              | 1.04E-13 | KIF15, NCAPH, BUB1, KNTC1, KIF11, KIF2C, TPX2, BUB1B, SMC3, NDC80, TTK, PLK1                                                                                    | 1.52E-11 |



|    |     |    |    |                                                            |          |                                                                                                                                                                                          |          |
|----|-----|----|----|------------------------------------------------------------|----------|------------------------------------------------------------------------------------------------------------------------------------------------------------------------------------------|----------|
| 40 | 276 | 84 | 28 | Cell Cycle Go 0007049                                      | 1.06E-13 | CCNE2, KIF15, NCAPH, BUB1, NASP, TIMELESS, KNTC1, CDT1, MSH5, RAD54L, SKP2, POLD1, KIF11, CHEK1, BRCA2, MCM2, KIF2C, TPX2, CDK2, CENPF, BUB1B, SMC3, CDC7, NDC80, TTK, TUBG1, PRC1, PLK1 | 1.52E-11 |
| 40 | 181 | 84 | 8  | Cytoskeleton Organization And Biogenesis                   | 3.67E-05 | KIF11, KIF2C, KIF4A, SMC3, KIF5B, TTK, TUBG1, PRC1                                                                                                                                       | 1.01E-03 |
| 40 | 105 | 84 | 8  | Chromosome Organization And Biogenesis                     | 6.43E-07 | EZH2, TOP2A, NCAPH, NASP, HDAC2, CHAF1A, TLK2, NDC80                                                                                                                                     | 2.41E-05 |
| 40 | 74  | 84 | 4  | Rna Splicing                                               | 1.75E-03 | BAT1, SFRS1, SFPQ, PRPF3                                                                                                                                                                 | 3.36E-02 |
| 40 | 63  | 84 | 5  | Establishment And Or Maintenance Of Chromatin Architecture | 7.49E-05 | EZH2, NASP, HDAC2, CHAF1A, TLK2                                                                                                                                                          | 1.93E-03 |
| 40 | 51  | 84 | 6  | Dna Dependent Dna Replication                              | 1.35E-06 | CDT1, EXO1, MSH5, CDK2, MCM3, RFC4                                                                                                                                                       | 4.63E-05 |
| 40 | 57  | 84 | 5  | Interphase Of Mitotic Cell Cycle                           | 4.61E-05 | SKP2, POLD1, CDK2, CENPF, CDC7                                                                                                                                                           | 1.23E-03 |
| 40 | 27  | 84 | 3  | Dna Packaging                                              | 8.49E-04 | TOP2A, NCAPH, CHAF1A                                                                                                                                                                     | 1.89E-02 |
| 40 | 9   | 84 | 5  | Spindle Organization And Biogenesis                        | 1.81E-09 | KIF11, SMC3, TTK, TUBG1, PRC1                                                                                                                                                            | 1.33E-07 |
| 40 | 150 | 84 | 10 | Response To Dna Damage Stimulus                            | 8.35E-08 | FANCC, EXO1, MSH5, RAD54L, POLD1, CHEK1, BRCA2, BRCA1, MCM7, FEN1                                                                                                                        | 3.83E-06 |
| 40 | 157 | 84 | 10 | Regulation Of Cell Cycle                                   | 1.29E-07 | CCNE2, BUB1, TIMELESS, KNTC1, CDT1, CHEK1, CDK2, BUB1B, CDC7, TTK                                                                                                                        | 5.58E-06 |
| 40 | 72  | 84 | 12 | M Phase Of Mitotic Cell Cycle                              | 1.66E-13 | KIF15, NCAPH, BUB1, KNTC1, KIF11, KIF2C, TPX2, BUB1B, SMC3, NDC80, TTK, PLK1                                                                                                             | 1.71E-11 |
| 40 | 266 | 84 | 7  | Regulation Of Cell Proliferation                           | 2.52E-03 | TIMELESS, CHEK1, BRCA2, BRCA1, CDK2, CDC7, TTK                                                                                                                                           | 4.63E-02 |
| 41 | 233 | 68 | 8  | Defense Response                                           | 4.74E-05 | CCL20, C5AR1, C2, HP, S100A8, STAB1, CEBPB, NOD2                                                                                                                                         | 9.77E-03 |
| 41 | 80  | 68 | 5  | Locomotory Behavior                                        | 8.57E-05 | CXCL5, CCL20, C5AR1, PLAUR, FPR1                                                                                                                                                         | 1.41E-02 |
| 41 | 261 | 68 | 8  | Response To Chemical Stimulus                              | 1.05E-04 | SOD2, CXCL5, STC1, CCL20, C5AR1, PLAUR, FPR1, NOD2                                                                                                                                       | 1.44E-02 |
| 41 | 21  | 68 | 3  | Response To Bacterium                                      | 2.13E-04 | SLC11A1, STAB1, NOD2                                                                                                                                                                     | 2.51E-02 |
| 41 | 207 | 68 | 9  | Immune Response                                            | 2.26E-06 | TREM1, IL1R2, CCL20, C5AR1, C2, CTSC, CEBPB, IL4R, IL6                                                                                                                                   | 9.31E-04 |
| 41 | 290 | 68 | 10 | Immune System Process                                      | 4.76E-06 | TREM1, IL1R2, CCL20, C5AR1, C2, CTSC, MAFB, CEBPB, IL4R, IL6                                                                                                                             | 1.31E-03 |
| 41 | 269 | 68 | 12 | Response To External Stimulus                              | 2.89E-08 | CXCL5, STC1, CCL20, C5AR1, C2, F13A1, PLAUR, S100A8, THBD, FPR1, CEBPB, NOD2                                                                                                             | 2.39E-05 |
| 41 | 168 | 68 | 6  | Response To Wounding                                       | 3.61E-04 | CCL20, C2, F13A1, S100A8, THBD, CEBPB                                                                                                                                                    | 3.72E-02 |

|    |     |    |    |                                                        |          |                                                                                                                                                 |          |
|----|-----|----|----|--------------------------------------------------------|----------|-------------------------------------------------------------------------------------------------------------------------------------------------|----------|
| 41 | 174 | 68 | 6  | Negative Regulation Of Developmental Process           | 4.35E-04 | BIRC3, MAFB, STAB1, IER3, IL6, SRGN                                                                                                             | 3.99E-02 |
| 41 | 29  | 68 | 3  | Humoral Immune Response                                | 5.67E-04 | TREMI, C2, IL6                                                                                                                                  | 4.67E-02 |
| 43 | 234 | 54 | 7  | Dna Metabolic Process                                  | 7.78E-05 | MCM2, RNASEH2A, DBF4, RFC4, TOP2A, KPNA2, RAD51                                                                                                 | 3.60E-03 |
| 43 | 19  | 54 | 3  | Mitotic Cell Cycle Checkpoint                          | 7.85E-05 | MAD2L1, TTK, BUB1B                                                                                                                              | 3.60E-03 |
| 43 | 99  | 54 | 10 | M Phase                                                | 1.57E-11 | BIRC5, MAD2L1, TTK, UBE2C, NDC80, BUB1B, KPNA2, AURKA, KIF2C, RAD51                                                                             | 2.59E-09 |
| 43 | 74  | 54 | 5  | Microtubule Based Process                              | 1.91E-05 | KIF23, TTK, KPNA2, KIF4A, KIF2C                                                                                                                 | 1.31E-03 |
| 43 | 33  | 54 | 5  | Regulation Of Mitosis                                  | 3.24E-07 | BIRC5, MAD2L1, TTK, UBE2C, BUB1B                                                                                                                | 2.97E-05 |
| 43 | 31  | 54 | 3  | Microtubule Cytoskeleton Organization And Biogenesis   | 3.51E-04 | KIF23, TTK, KIF2C                                                                                                                               | 1.38E-02 |
| 43 | 63  | 54 | 5  | Interphase                                             | 8.66E-06 | BIRC5, CENPF, DBF4, CDKN3, KPNA2                                                                                                                | 6.49E-04 |
| 43 | 170 | 54 | 16 | Cell Cycle Process                                     | 0.00E+00 | BIRC5, CENPF, FBXO5, KIF23, MAD2L1, DBF4, TTK, UBE2C, NDC80, BUB1B, CDKN3, RACGAP1, KPNA2, AURKA, KIF2C, RAD51                                  | 0.00E+00 |
| 43 | 134 | 54 | 14 | Mitotic Cell Cycle                                     | 0.00E+00 | BIRC5, CENPF, FBXO5, KIF23, MAD2L1, DBF4, TTK, UBE2C, NDC80, BUB1B, CDKN3, KPNA2, AURKA, KIF2C                                                  | 0.00E+00 |
| 43 | 153 | 54 | 13 | Cell Cycle Phase                                       | 7.52E-14 | BIRC5, CENPF, MAD2L1, DBF4, TTK, UBE2C, NDC80, BUB1B, CDKN3, KPNA2, AURKA, KIF2C, RAD51                                                         | 1.55E-11 |
| 43 | 43  | 54 | 4  | Cell Cycle Checkpoint Go 0000075                       | 3.91E-05 | BIRC5, MAD2L1, TTK, BUB1B                                                                                                                       | 2.31E-03 |
| 43 | 28  | 54 | 3  | Chromosome Segregation                                 | 2.58E-04 | CENPF, TOP2A, NDC80                                                                                                                             | 1.06E-02 |
| 43 | 93  | 54 | 5  | Dna Replication                                        | 5.78E-05 | MCM2, RNASEH2A, DBF4, RFC4, RAD51                                                                                                               | 3.18E-03 |
| 43 | 39  | 54 | 3  | Regulation Of Cyclin Dependent Protein Kinase Activity | 6.95E-04 | CKS2, CKS1B, CDKN3                                                                                                                              | 2.39E-02 |
| 43 | 70  | 54 | 8  | Mitosis                                                | 7.27E-10 | BIRC5, MAD2L1, TTK, UBE2C, NDC80, BUB1B, AURKA, KIF2C                                                                                           | 9.99E-08 |
| 43 | 276 | 54 | 21 | Cell Cycle Go 0007049                                  | 0.00E+00 | BIRC5, CENPF, FBXO5, KIF23, MCM2, MAD2L1, DTYMK, DBF4, CKS2, CKS1B, TTK, UBE2C, NDC80, CDC20, BUB1B, CDKN3, RACGAP1, KPNA2, AURKA, KIF2C, RAD51 | 0.00E+00 |
| 43 | 181 | 54 | 6  | Cytoskeleton Organization And Biogenesis               | 1.51E-04 | KIF23, TTK, RACGAP1, KPNA2, KIF4A, KIF2C                                                                                                        | 6.54E-03 |
| 43 | 57  | 54 | 5  | Interphase Of Mitotic Cell Cycle                       | 5.26E-06 | BIRC5, CENPF, DBF4, CDKN3, KPNA2                                                                                                                | 4.34E-04 |
| 43 | 157 | 54 | 9  | Regulation Of Cell Cycle                               | 2.79E-08 | BIRC5, FBXO5, MAD2L1, CKS2, CKS1B, TTK, UBE2C, BUB1B, CDKN3                                                                                     | 2.87E-06 |

|    |     |    |   |                                                                                          |          |                                                                 |          |
|----|-----|----|---|------------------------------------------------------------------------------------------|----------|-----------------------------------------------------------------|----------|
| 43 | 72  | 54 | 8 | M Phase Of Mitotic Cell Cycle                                                            | 9.15E-10 | BIRC5, MAD2L1, TTK, UBE2C, NDC80, BUB1B, AURKA, KIF2C           | 1.08E-07 |
| 44 | 138 | 43 | 5 | Rna Processing                                                                           | 1.25E-04 | PRPF31, CPSF6, CSTF2, DHX38, NONO                               | 3.43E-02 |
| 44 | 61  | 43 | 5 | Mrna Processing Go 0006397                                                               | 2.34E-06 | PRPF31, CPSF6, CSTF2, DHX38, NONO                               | 1.93E-03 |
| 44 | 71  | 43 | 5 | Mrna Metabolic Process                                                                   | 5.00E-06 | PRPF31, CPSF6, CSTF2, DHX38, NONO                               | 2.06E-03 |
| 45 | 104 | 95 | 6 | Positive Regulation Of Transcriptiondna Dependent                                        | 1.68E-04 | TCF4, BPTF, NCOA6, MAML1, RBM14, MED1                           | 1.53E-02 |
| 45 | 59  | 95 | 4 | Positive Regulation Of Transcription From Rna Polymerase Ii Promoter                     | 1.19E-03 | NCOA6, MAML1, RBM14, MED1                                       | 4.26E-02 |
| 45 | 249 | 95 | 8 | Macromolecular Complex Assembly                                                          | 7.71E-04 | SMARCA5, GTF2I, ZW10, NCOA6, SFRS2IP, SFRS1, MED1, GTF2F1       | 3.03E-02 |
| 45 | 133 | 95 | 6 | Positive Regulation Of Nucleobasenucleosidenucleotide And Nucleic Acid Metabolic Process | 6.31E-04 | TCF4, BPTF, NCOA6, MAML1, RBM14, MED1                           | 2.74E-02 |
| 45 | 77  | 95 | 5 | Nuclear Transport                                                                        | 3.47E-04 | AKT1, KHDRBS1, KPNB1, XPO6, TPR                                 | 1.91E-02 |
| 45 | 106 | 95 | 6 | Positive Regulation Of Rna Metabolic Process                                             | 1.86E-04 | TCF4, BPTF, NCOA6, MAML1, RBM14, MED1                           | 1.53E-02 |
| 45 | 93  | 95 | 5 | Protein Targeting                                                                        | 8.26E-04 | AKT1, KPNB1, XPO6, ATG4B, TPR                                   | 3.10E-02 |
| 45 | 32  | 95 | 5 | Transcription Initiation                                                                 | 4.68E-06 | SMARCA5, GTF2I, NCOA6, MED1, GTF2F1                             | 9.64E-04 |
| 45 | 43  | 95 | 5 | Protein Dna Complex Assembly                                                             | 2.09E-05 | SMARCA5, GTF2I, NCOA6, MED1, GTF2F1                             | 2.87E-03 |
| 45 | 263 | 95 | 9 | Regulation Of Transcription From Rna Polymerase Ii Promoter                              | 2.25E-04 | SMARCA5, TRIM27, BPTF, NCOA6, MAML1, RBM14, ZNF148, MED1, DNMT1 | 1.55E-02 |
| 45 | 138 | 95 | 8 | Rna Processing                                                                           | 1.28E-05 | CPSF6, KHDRBS1, SFRS2IP, ZNF638, SFRS1, U2AF1, SSB, PABPC4      | 2.10E-03 |
| 45 | 266 | 95 | 9 | Cellular Component Assembly                                                              | 2.45E-04 | SMARCA5, HIP1, GTF2I, ZW10, NCOA6, SFRS2IP, SFRS1, MED1, GTF2F1 | 1.55E-02 |
| 45 | 61  | 95 | 4 | Mrna Processing Go 0006397                                                               | 1.35E-03 | CPSF6, KHDRBS1, SFRS2IP, SFRS1                                  | 4.48E-02 |
| 45 | 27  | 95 | 4 | Transcription Initiation From Rna Polymerase Ii Promoter                                 | 5.55E-05 | GTF2I, NCOA6, MED1, GTF2F1                                      | 6.54E-03 |
| 45 | 71  | 95 | 5 | Mrna Metabolic Process                                                                   | 2.37E-04 | CPSF6, KHDRBS1, SFRS2IP, SFRS1, SSB                             | 1.55E-02 |
| 45 | 105 | 95 | 5 | Chromosome Organization And Biogenesis                                                   | 1.43E-03 | SMARCA5, ZW10, BPTF, RFC1, RBM14                                | 4.52E-02 |
| 45 | 124 | 95 | 6 | Positive Regulation Of Transcription                                                     | 4.35E-04 | TCF4, BPTF, NCOA6, MAML1, RBM14, MED1                           | 2.24E-02 |
| 45 | 77  | 95 | 5 | Nucleocytoplasmic Transport                                                              | 3.47E-04 | AKT1, KHDRBS1, KPNB1, XPO6, TPR                                 | 1.91E-02 |
| 46 | 138 | 60 | 7 | Rna Processing                                                                           | 5.19E-06 | PRPF4B, DIS3, SRPK1, EXOSC2, USP39, CPSF6, CSTF1                | 8.56E-04 |
| 46 | 61  | 60 | 4 | Mrna Processing Go 0006397                                                               | 2.35E-04 | SRPK1, USP39, CPSF6, CSTF1                                      | 3.14E-02 |
| 46 | 71  | 60 | 6 | Mrna Metabolic Process                                                                   | 1.32E-06 | SRPK1, SMG1, USP39, GSPT1, CPSF6, CSTF1                         | 3.63E-04 |

|    |     |    |    |                                                            |          |                                                                                    |          |
|----|-----|----|----|------------------------------------------------------------|----------|------------------------------------------------------------------------------------|----------|
| 46 | 63  | 60 | 4  | Establishment And Or Maintenance Of Chromatin Architecture | 2.66E-04 | SMARCC1, NASP, TLK2, SAFB                                                          | 3.14E-02 |
| 47 | 249 | 59 | 9  | Macromolecular Complex Assembly                            | 3.05E-06 | CHAF1A, GTF2F1, HCFC1, EIF3B, NCOA6, MED1, ATF7IP, EPRS, GTF2I                     | 1.26E-03 |
| 47 | 77  | 59 | 4  | Nuclear Transport                                          | 5.39E-04 | KHDRBS1, XPO6, KPNB1, KPNA6                                                        | 2.96E-02 |
| 47 | 32  | 59 | 4  | Transcription Initiation                                   | 1.69E-05 | GTF2F1, NCOA6, MED1, GTF2I                                                         | 2.32E-03 |
| 47 | 43  | 59 | 6  | Protein Dna Complex Assembly                               | 5.65E-08 | CHAF1A, GTF2F1, NCOA6, MED1, ATF7IP, GTF2I                                         | 4.66E-05 |
| 47 | 266 | 59 | 9  | Cellular Component Assembly                                | 5.23E-06 | CHAF1A, GTF2F1, HCFC1, EIF3B, NCOA6, MED1, ATF7IP, EPRS, GTF2I                     | 1.44E-03 |
| 47 | 27  | 59 | 4  | Transcription Initiation From Rna Polymerase Ii Promoter   | 8.38E-06 | GTF2F1, NCOA6, MED1, GTF2I                                                         | 1.73E-03 |
| 47 | 77  | 59 | 4  | Nucleocytoplasmic Transport                                | 5.39E-04 | KHDRBS1, XPO6, KPNB1, KPNA6                                                        | 2.96E-02 |
| 49 | 40  | 41 | 3  | Response To Virus                                          | 3.32E-04 | TLR7, PTPRC, LILRB1                                                                | 2.49E-02 |
| 49 | 128 | 41 | 4  | Multi Organism Process                                     | 9.10E-04 | CD4, TLR7, PTPRC, LILRB1                                                           | 3.09E-02 |
| 49 | 124 | 41 | 4  | Positive Regulation Of Cell Proliferation                  | 8.08E-04 | CD86, IL18, PTPRC, HCLS1                                                           | 3.09E-02 |
| 49 | 62  | 41 | 3  | Cell Activation                                            | 1.21E-03 | CD4, IL18, PTPRC                                                                   | 3.11E-02 |
| 49 | 69  | 41 | 4  | Hemopoiesis                                                | 8.52E-05 | CD4, PTPRC, HCLS1, SPI1                                                            | 1.54E-02 |
| 49 | 74  | 41 | 4  | Immune System Development                                  | 1.12E-04 | CD4, PTPRC, HCLS1, SPI1                                                            | 1.54E-02 |
| 49 | 35  | 41 | 3  | Cytokine Metabolic Process                                 | 2.22E-04 | IL18, TLR7, TLR1                                                                   | 2.04E-02 |
| 49 | 233 | 41 | 7  | Defense Response                                           | 1.19E-05 | TLR7, CYBB, MNDA, PTPRC, RNASE6, CSF3R, CCR1                                       | 3.27E-03 |
| 49 | 150 | 41 | 4  | Regulation Of Protein Metabolic Process                    | 1.64E-03 | TLR7, ITGB2, TLR1, HCLS1                                                           | 3.65E-02 |
| 49 | 60  | 41 | 3  | Cytokine Production                                        | 1.10E-03 | IL18, TLR7, TLR1                                                                   | 3.11E-02 |
| 49 | 62  | 41 | 3  | Positive Regulation Of Cellular Protein Metabolic Process  | 1.21E-03 | TLR7, TLR1, HCLS1                                                                  | 3.11E-02 |
| 49 | 57  | 41 | 3  | Leukocyte Activation                                       | 9.44E-04 | CD4, IL18, PTPRC                                                                   | 3.09E-02 |
| 49 | 207 | 41 | 9  | Immune Response                                            | 2.40E-08 | FYB, NCF4, CD86, IL18, TLR7, CTSS, LCP2, PTPRC, CCR1                               | 9.89E-06 |
| 49 | 71  | 41 | 4  | Hemopoietic Or Lymphoid Organ Development                  | 9.53E-05 | CD4, PTPRC, HCLS1, SPI1                                                            | 1.54E-02 |
| 49 | 63  | 41 | 3  | Response To Other Organism                                 | 1.26E-03 | TLR7, PTPRC, LILRB1                                                                | 3.11E-02 |
| 49 | 172 | 41 | 4  | Homeostatic Process                                        | 2.70E-03 | PTPRC, HCLS1, SPI1, CCR1                                                           | 4.80E-02 |
| 49 | 290 | 41 | 14 | Immune System Process                                      | 3.06E-13 | FYB, NCF4, CD4, SYK, CD86, IL18, TLR7, CTSS, ITGB2, LCP2, PTPRC, HCLS1, SPI1, CCR1 | 2.53E-10 |
| 49 | 39  | 41 | 3  | T Cell Activation                                          | 3.07E-04 | CD4, IL18, PTPRC                                                                   | 2.49E-02 |
| 49 | 34  | 41 | 3  | Cytokine Biosynthetic Process                              | 2.04E-04 | IL18, TLR7, TLR1                                                                   | 2.04E-02 |
| 49 | 64  | 41 | 3  | Positive Regulation Of Protein Metabolic Process           | 1.32E-03 | TLR7, TLR1, HCLS1                                                                  | 3.11E-02 |
| 49 | 52  | 41 | 3  | Lymphocyte Activation                                      | 7.21E-04 | CD4, IL18, PTPRC                                                                   | 3.09E-02 |
| 49 | 139 | 41 | 4  | Regulation Of Cellular Protein Metabolic Process           | 1.24E-03 | TLR7, ITGB2, TLR1, HCLS1                                                           | 3.11E-02 |
| 51 | 40  | 88 | 4  | Response To Virus                                          | 1.99E-04 | PTPRC, TLR7, LILRB1, APOBEC3G                                                      | 1.28E-02 |
| 51 | 95  | 88 | 5  | Positive Regulation Of Signal Transduction                 | 6.42E-04 | PTPRC, LGALS9, CASP1, LYN, HMOX1                                                   | 3.12E-02 |

|    |     |    |    |                                           |          |                                                                                                                               |          |
|----|-----|----|----|-------------------------------------------|----------|-------------------------------------------------------------------------------------------------------------------------------|----------|
| 51 | 128 | 88 | 6  | Multi Organism Process                    | 3.41E-04 | PTPRC, CD4, TLR7, LILRB1, HLA-DPB1, APOBEC3G                                                                                  | 1.88E-02 |
| 51 | 69  | 88 | 5  | Hemopoiesis                               | 1.45E-04 | PTPRC, SCIN, CD4, MAFB, LYN                                                                                                   | 1.28E-02 |
| 51 | 74  | 88 | 5  | Immune System Development                 | 2.01E-04 | PTPRC, SCIN, CD4, MAFB, LYN                                                                                                   | 1.28E-02 |
| 51 | 233 | 88 | 13 | Defense Response                          | 1.27E-08 | PTPRC, LY96, ADORA3, MNDA, CCR1, AIF1, C3AR1, NCF2, TLR7, RNASE6, CYBB, LYZ, APOBEC3G                                         | 3.49E-06 |
| 51 | 60  | 88 | 5  | Cytokine Production                       | 7.40E-05 | IL18, PYCARD, SRGN, TLR1, TLR7                                                                                                | 8.72E-03 |
| 51 | 11  | 88 | 3  | Leukocyte Chemotaxis                      | 5.96E-05 | SYK, ITGB2, DOCK2                                                                                                             | 8.20E-03 |
| 51 | 10  | 88 | 3  | Defense Response To Virus                 | 4.36E-05 | PTPRC, TLR7, APOBEC3G                                                                                                         | 7.20E-03 |
| 51 | 113 | 88 | 6  | Inflammatory Response                     | 1.73E-04 | ADORA3, CCR1, AIF1, C3AR1, CYBB, LYZ                                                                                          | 1.28E-02 |
| 51 | 207 | 88 | 13 | Immune Response                           | 3.04E-09 | FYB, CD86, IL18, PTPRC, TREM2, IGSF6, LCP2, CCR1, FCGR1A, CTSS, TLR7, NCF4, APOBEC3G                                          | 1.25E-06 |
| 51 | 71  | 88 | 5  | Hemopoietic Or Lymphoid Organ Development | 1.66E-04 | PTPRC, SCIN, CD4, MAFB, LYN                                                                                                   | 1.28E-02 |
| 51 | 63  | 88 | 4  | Response To Other Organism                | 1.14E-03 | PTPRC, TLR7, LILRB1, APOBEC3G                                                                                                 | 4.86E-02 |
| 51 | 290 | 88 | 20 | Immune System Process                     | 0.00E+00 | FYB, SYK, CD86, IL18, PTPRC, ITGB2, DOCK2, SCIN, TREM2, IGSF6, LCP2, CCR1, CD4, FCGR1A, CTSS, TLR7, NCF4, MAFB, LYN, APOBEC3G | 0.00E+00 |
| 51 | 269 | 88 | 10 | Response To External Stimulus             | 2.55E-05 | SYK, ITGB2, DOCK2, RNASE2, ADORA3, CCR1, AIF1, C3AR1, CYBB, LYZ                                                               | 5.26E-03 |
| 51 | 19  | 88 | 3  | Rna Catabolic Process                     | 3.36E-04 | RNASE2, RNASE3, RNASE6                                                                                                        | 1.88E-02 |
| 51 | 13  | 88 | 3  | Leukocyte Migration                       | 1.02E-04 | SYK, ITGB2, DOCK2                                                                                                             | 1.05E-02 |
