# Supplementary material for: A Computational Approach to Identifying Gene-microRNA Modules in Cancer
Source: PubMed Central journal article supplement (PMC4303261; doi:10.1371/journal.pcbi.1004042), 2015-01-22
Supplement: pcbi.1004042.s026.pdf [file pcbi.1004042.s026.pdf]

**Table S19. GBM modules with enriched pathways in KEGG.**

| Module ID | m   | k  | x  | Gene Ontology                             | p-value  | Genes                                                                                                                     | p-value  |
|-----------|-----|----|----|-------------------------------------------|----------|---------------------------------------------------------------------------------------------------------------------------|----------|
| 2         | 32  | 98 | 6  | Dna Replication                           | 1.90E-07 | MCM2, MCM4, POLA2, MCM3, MCM7, MCM6                                                                                       | 1.77E-05 |
| 2         | 111 | 98 | 19 | Cell Cycle                                | 0.00E+00 | TTK, ESPL1, BUB1, CDC7, ORC6L, BUB1B, PLK1, CHEK1, CCNA2, MCM2, MCM4, CDC6, CDC25C, MCM3, BUB3, MCM7, CDC20, MAD2L1, MCM6 | 0.00E+00 |
| 2         | 92  | 98 | 8  | Oocyte Meiosis                            | 7.65E-07 | ESPL1, AURKA, BUB1, FBXO5, PLK1, CDC25C, CDC20, MAD2L1                                                                    | 4.74E-05 |
| 2         | 73  | 98 | 5  | Progesterone Mediated Oocyte Maturation   | 3.12E-04 | BUB1, PLK1, CCNA2, CDC25C, MAD2L1                                                                                         | 1.45E-02 |
| 4         | 90  | 41 | 5  | Toll Like Receptor Signaling Pathway      | 1.26E-05 | CXCL11, IRF7, STAT1, TLR3, CXCL10                                                                                         | 2.35E-03 |
| 5         | 32  | 56 | 5  | Dna Replication                           | 3.32E-07 | LIG1, MCM7, MCM2, MCM4, MCM3                                                                                              | 3.08E-05 |
| 5         | 111 | 56 | 9  | Cell Cycle                                | 1.83E-09 | CHEK1, MCM7, CDK2, MCM2, MCM4, MCM3, TTK, PLK1, BUB1B                                                                     | 3.40E-07 |
| 7         | 98  | 43 | 4  | Spliceosome                               | 3.99E-04 | LSM4, SFRS3, SNRPD1, SFRS2                                                                                                | 2.47E-02 |
| 7         | 111 | 43 | 6  | Cell Cycle                                | 2.47E-06 | MAD2L1, DBF4, CCNB1, PCNA, ORC4L, BUB1B                                                                                   | 4.60E-04 |
| 7         | 92  | 43 | 4  | Oocyte Meiosis                            | 3.13E-04 | MAD2L1, CCNB1, AURKA, PPP1CC                                                                                              | 2.47E-02 |
| 8         | 236 | 73 | 7  | Mapk Signaling Pathway                    | 5.51E-04 | PLA2G2A, IL1R2, HSPA6, IL1B, CD14, MAP3K8, FAS                                                                            | 1.14E-02 |
| 8         | 218 | 73 | 12 | Cytokine Cytokine Receptor Interaction    | 6.37E-09 | CXCL5, IL1R2, CCL20, IL10RA, TNFRSF1B, CCR5, IL1B, IL4R, CCR1, CCL2, FAS, IL13RA1                                         | 5.93E-07 |
| 8         | 156 | 73 | 9  | Chemokine Signaling Pathway               | 3.90E-07 | CXCL5, CCL20, HCK, CCR5, NCF1, WAS, CCR1, CCL2, LYN                                                                       | 2.42E-05 |
| 8         | 90  | 73 | 4  | Toll Like Receptor Signaling Pathway      | 2.14E-03 | IL1B, CD14, TLR1, MAP3K8                                                                                                  | 3.99E-02 |
| 8         | 78  | 73 | 6  | Hematopoietic Cell Lineage                | 7.33E-06 | IL1R2, IL1B, CD14, IL4R, ITGAM, CD44                                                                                      | 2.73E-04 |
| 8         | 108 | 73 | 5  | Natural Killer Cell Mediated Cytotoxicity | 4.89E-04 | ICAM1, PTPN6, SYK, PLCG2, FAS                                                                                             | 1.14E-02 |
| 8         | 68  | 73 | 6  | B Cell Receptor Signaling Pathway         | 3.28E-06 | PTPN6, FCGR2B, SYK, BTK, PLCG2, LYN                                                                                       | 1.52E-04 |
| 8         | 72  | 73 | 5  | Fc Epsilon R1 Signaling Pathway           | 7.27E-05 | PLA2G2A, SYK, BTK, PLCG2, LYN                                                                                             | 1.93E-03 |
| 8         | 84  | 73 | 9  | Fc Gamma R Mediated Phagocytosis          | 1.70E-09 | HCK, NCF1, FCGR2B, WAS, SYK, PLCG2, LYN, PTPRC, FCGR2A                                                                    | 3.17E-07 |
| 8         | 63  | 73 | 5  | Leishmania Infection                      | 3.81E-05 | IL1B, NCF1, PTPN6, ITGAM, FCGR2A                                                                                          | 1.18E-03 |
| 10        | 32  | 73 | 4  | Dna Replication                           | 3.93E-05 | FEN1, MCM3, MCM4, MCM2                                                                                                    | 3.66E-03 |
| 10        | 111 | 73 | 12 | Cell Cycle                                | 2.38E-12 | CHEK1, ORC2L, CDK2, PLK1, BUB1B, SKP2, TFDP2, MCM3, HDAC1, MCM4, CCNA2, MCM2                                              | 4.43E-10 |

|    |     |    |    |                                           |          |                                                                                                                |          |
|----|-----|----|----|-------------------------------------------|----------|----------------------------------------------------------------------------------------------------------------|----------|
| 11 | 236 | 89 | 13 | Mapk Signaling Pathway                    | 1.70E-08 | PLA2G5, BDNF, FGF14, FGF2, FAS, IKBKB, JUN, FGFR4, TNFRSF1A, RPS6KA3, RELB, MAPK1, FLNA                        | 3.16E-06 |
| 11 | 80  | 89 | 6  | ErbB Signaling Pathway                    | 2.66E-05 | SHC1, JUN, ERBB2, CBLC, MAPK1, CDKN1A                                                                          | 6.20E-04 |
| 11 | 156 | 89 | 6  | Chemokine Signaling Pathway               | 1.03E-03 | SHC1, PXN, PTK2B, IKBKB, MAPK1, TIAM1                                                                          | 1.47E-02 |
| 11 | 60  | 89 | 5  | P53 Signaling Pathway                     | 7.81E-05 | BAX, TNFRSF10B, FAS, DDB2, CDKN1A                                                                              | 1.45E-03 |
| 11 | 79  | 89 | 8  | Apoptosis                                 | 1.10E-07 | BAX, TNFRSF10B, CFLAR, FAS, IKBKB, BCL2L1, TNFRSF1A, MYD88                                                     | 6.82E-06 |
| 11 | 90  | 89 | 5  | Toll Like Receptor Signaling Pathway      | 5.28E-04 | IKBKB, JUN, TICAM1, MYD88, MAPK1                                                                               | 8.19E-03 |
| 11 | 108 | 89 | 5  | Natural Killer Cell Mediated Cytotoxicity | 1.21E-03 | SHC1, PTK2B, TNFRSF10B, FAS, MAPK1                                                                             | 1.60E-02 |
| 11 | 116 | 89 | 7  | Neurotrophin Signaling Pathway            | 2.30E-05 | BAX, SHC1, BDNF, IKBKB, JUN, RPS6KA3, MAPK1                                                                    | 6.12E-04 |
| 11 | 182 | 89 | 10 | Regulation Of Actin Cytoskeleton          | 8.80E-07 | PDGFD, ITGA2, ITGA3, PXN, FGF14, FGF2, IQGAP1, FGFR4, MAPK1, TIAM1                                             | 3.44E-05 |
| 11 | 90  | 89 | 4  | Gnrh Signaling Pathway                    | 4.39E-03 | PLA2G5, PTK2B, JUN, MAPK1                                                                                      | 4.54E-02 |
| 11 | 70  | 89 | 4  | Pancreatic Cancer                         | 1.76E-03 | IKBKB, BCL2L1, ERBB2, MAPK1                                                                                    | 2.19E-02 |
| 11 | 85  | 89 | 6  | Prostate Cancer                           | 3.77E-05 | PDGFD, IKBKB, ERBB2, AR, MAPK1, CDKN1A                                                                         | 7.78E-04 |
| 11 | 66  | 89 | 5  | Melanoma                                  | 1.23E-04 | PDGFD, FGF14, FGF2, MAPK1, CDKN1A                                                                              | 2.09E-03 |
| 11 | 41  | 89 | 3  | Bladder Cancer                            | 3.40E-03 | ERBB2, MAPK1, CDKN1A                                                                                           | 3.72E-02 |
| 11 | 70  | 89 | 6  | Chronic Myeloid Leukemia                  | 1.23E-05 | SHC1, IKBKB, BCL2L1, CBLC, MAPK1, CDKN1A                                                                       | 3.82E-04 |
| 11 | 81  | 89 | 4  | Small Cell Lung Cancer                    | 3.01E-03 | ITGA2, ITGA3, IKBKB, BCL2L1                                                                                    | 3.50E-02 |
| 12 | 183 | 47 | 15 | Focal Adhesion                            | 0.00E+00 | COL5A1, COL4A1, LAMC1, COL1A1, COL4A2, COL5A2, LAMB1, LAMC3, PDGFRB, ITGA5, COL6A3, ITGB1, COL1A2, COL3A1, FN1 | 0.00E+00 |
| 12 | 78  | 47 | 14 | Ecm Receptor Interaction                  | 2.83E-14 | COL5A1, COL4A1, LAMC1, COL1A1, COL4A2, COL5A2, LAMB1, LAMC3, ITGA5, COL6A3, ITGB1, COL1A2, COL3A1, FN1         | 2.63E-12 |
| 12 | 182 | 47 | 5  | Regulation Of Actin Cytoskeleton          | 6.85E-04 | PDGFRB, ITGA5, ITGB1, MYH9, FN1                                                                                | 2.55E-02 |
| 12 | 81  | 47 | 7  | Small Cell Lung Cancer                    | 2.42E-08 | COL4A1, LAMC1, COL4A2, LAMB1, LAMC3, ITGB1, FN1                                                                | 1.50E-06 |
| 13 | 43  | 91 | 4  | Rna Degradation                           | 3.01E-04 | LSM2, EXOSC5, EXOSC9, LSM4                                                                                     | 1.86E-02 |
| 13 | 32  | 91 | 4  | Dna Replication                           | 9.33E-05 | RFC2, RNASEH2A, RFC5, PCNA                                                                                     | 1.74E-02 |
| 13 | 98  | 91 | 5  | Spliceosome                               | 8.62E-04 | USP39, LSM2, SFRS3, SNRPD1, LSM4                                                                               | 3.21E-02 |
| 13 | 41  | 91 | 4  | Nucleotide Excision Repair                | 2.50E-04 | RFC2, ERCC8, RFC5, PCNA                                                                                        | 1.86E-02 |
| 13 | 23  | 91 | 3  | Mismatch Repair                           | 6.63E-04 | RFC2, RFC5, PCNA                                                                                               | 3.08E-02 |

|    |     |    |    |                                         |          |                                                                                                                                     |          |
|----|-----|----|----|-----------------------------------------|----------|-------------------------------------------------------------------------------------------------------------------------------------|----------|
| 14 | 183 | 65 | 8  | Focal Adhesion                          | 5.88E-06 | CAV1, VEGFA, THBS1, ITGA5, FLNA, SHC1, LAMC1, LAMB1                                                                                 | 1.09E-03 |
| 14 | 78  | 65 | 4  | Ecm Receptor Interaction                | 8.17E-04 | THBS1, ITGA5, LAMC1, LAMB1                                                                                                          | 3.80E-02 |
| 14 | 65  | 65 | 5  | Complement And Coagulation Cascades     | 2.52E-05 | PLAU, C5AR1, SERPINE1, PLAUR, THBD                                                                                                  | 1.81E-03 |
| 14 | 67  | 65 | 5  | Antigen Processing And Presentation     | 2.92E-05 | HSPA6, HSPA5, CTSB, CTSL1, PDIA3                                                                                                    | 1.81E-03 |
| 16 | 32  | 93 | 4  | Dna Replication                         | 1.02E-04 | MCM4, POLD1, POLA2, FEN1                                                                                                            | 2.70E-03 |
| 16 | 31  | 93 | 4  | Base Excision Repair                    | 8.94E-05 | NEIL3, LIG3, POLD1, FEN1                                                                                                            | 2.70E-03 |
| 16 | 27  | 93 | 4  | Homologous Recombination                | 5.11E-05 | RAD51, RAD54L, BRCA2, POLD1                                                                                                         | 2.37E-03 |
| 16 | 111 | 93 | 17 | Cell Cycle                              | 3.38E-14 | CCNA2, ESPL1, CDC6, CHEK1, BUB1, CHEK2, PLK1, MCM4, BUB1B, SKP2, ORC1L, CDC25C, CCNB2, TTK, CDK2, CDC20, CDC25A                     | 6.28E-12 |
| 16 | 92  | 93 | 8  | Oocyte Meiosis                          | 5.11E-07 | ESPL1, AURKA, BUB1, PLK1, CDC25C, CCNB2, CDK2, CDC20                                                                                | 4.75E-05 |
| 16 | 60  | 93 | 5  | P53 Signaling Pathway                   | 9.63E-05 | GTSE1, CHEK1, CHEK2, CCNB2, CDK2                                                                                                    | 2.70E-03 |
| 16 | 73  | 93 | 7  | Progesterone Mediated Oocyte Maturation | 1.40E-06 | CCNA2, BUB1, PLK1, CDC25C, CCNB2, CDK2, CDC25A                                                                                      | 8.70E-05 |
| 17 | 183 | 59 | 18 | Focal Adhesion                          | 8.88E-16 | COL5A1, COL6A2, THBS1, COL6A1, COL1A1, COL4A2, COL5A2, LAMB1, FN1, LAMC3, MYL9, PDGFRB, ITGA5, COL6A3, ITGB1, COL1A2, COL3A1, ITGA4 | 1.65E-13 |
| 17 | 78  | 59 | 16 | Ecm Receptor Interaction                | 1.72E-14 | COL5A1, COL6A2, THBS1, COL6A1, COL1A1, COL4A2, COL5A2, LAMB1, FN1, LAMC3, ITGA5, COL6A3, ITGB1, COL1A2, COL3A1, ITGA4               | 1.60E-12 |
| 17 | 100 | 59 | 4  | Leukocyte Transendothelial Migration    | 1.44E-03 | MMP9, MYL9, ITGB1, ITGA4                                                                                                            | 3.34E-02 |
| 17 | 182 | 59 | 8  | Regulation Of Actin Cytoskeleton        | 2.68E-06 | FN1, MYL9, PDGFRB, ITGA5, ITGB1, MYH9, ITGA4, SLC9A1                                                                                | 1.66E-04 |
| 17 | 81  | 59 | 5  | Small Cell Lung Cancer                  | 4.58E-05 | COL4A2, LAMB1, FN1, LAMC3, ITGB1                                                                                                    | 1.42E-03 |
| 17 | 76  | 59 | 5  | Hypertrophic Cardiomyopathy Hcm         | 3.36E-05 | TPM2, ITGA5, ITGB1, ITGA4, TPM4                                                                                                     | 1.42E-03 |
| 17 | 81  | 59 | 5  | Dilated Cardiomyopathy                  | 4.58E-05 | TPM2, ITGA5, ITGB1, ITGA4, TPM4                                                                                                     | 1.42E-03 |
| 21 | 60  | 70 | 4  | P53 Signaling Pathway                   | 3.99E-04 | SERPINE1, CDKN1A, FAS, TNFRSF10B                                                                                                    | 3.36E-02 |
| 21 | 183 | 70 | 9  | Focal Adhesion                          | 1.04E-06 | ZYX, ITGA5, LAMC1, FLNA, SHC1, ACTN1, PARVA, LAMB1, COL5A2                                                                          | 1.93E-04 |
| 21 | 65  | 70 | 4  | Complement And Coagulation Cascades     | 5.43E-04 | PLAU, SERPINE1, PLAUR, C5AR1                                                                                                        | 3.36E-02 |
| 24 | 218 | 38 | 5  | Cytokine Cytokine Receptor Interaction  | 5.73E-04 | TGFBR1, TGFBR2, OSMR, CSF2RB, IL13RA1                                                                                               | 2.59E-02 |

|    |     |     |    |                                         |          |                                                                     |          |
|----|-----|-----|----|-----------------------------------------|----------|---------------------------------------------------------------------|----------|
| 24 | 156 | 38  | 4  | Chemokine Signaling Pathway             | 1.42E-03 | NFKB1, PRKCD, JAK2, HCK                                             | 2.93E-02 |
| 24 | 108 | 38  | 4  | Lysosome                                | 3.57E-04 | GM2A, CTSS, NAGA, HEXA                                              | 2.59E-02 |
| 24 | 79  | 38  | 3  | Apoptosis                               | 1.94E-03 | RIPK1, NFKB1, CSF2RB                                                | 3.61E-02 |
| 24 | 90  | 38  | 3  | Toll Like Receptor Signaling Pathway    | 2.82E-03 | RIPK1, NFKB1, TLR2                                                  | 4.37E-02 |
| 24 | 59  | 38  | 3  | Rig I Like Receptor Signaling Pathway   | 8.34E-04 | RIPK1, DDX3X, NFKB1                                                 | 2.59E-02 |
| 24 | 128 | 38  | 4  | Jak Stat Signaling Pathway              | 6.80E-04 | OSMR, CSF2RB, JAK2, IL13RA1                                         | 2.59E-02 |
| 24 | 84  | 38  | 3  | Fc Gamma R Mediated Phagocytosis        | 2.32E-03 | PRKCD, PTPRC, HCK                                                   | 3.92E-02 |
| 24 | 63  | 38  | 5  | Leishmania Infection                    | 1.47E-06 | NFKB1, HLA-DQB1, JAK2, NCF2, TLR2                                   | 2.73E-04 |
| 24 | 70  | 38  | 3  | Pancreatic Cancer                       | 1.37E-03 | TGFBR1, TGFBR2, NFKB1                                               | 2.93E-02 |
| 24 | 70  | 38  | 3  | Chronic Myeloid Leukemia                | 1.37E-03 | TGFBR1, TGFBR2, NFKB1                                               | 2.93E-02 |
| 25 | 183 | 75  | 7  | Focal Adhesion                          | 1.39E-04 | VEGFA, IBSP, ACTN1, BIRC3, FLNA, THBS1, ITGA5                       | 1.29E-02 |
| 25 | 65  | 75  | 5  | Complement And Coagulation Cascades     | 5.06E-05 | PLAU, SERPINE1, F13A1, C5AR1, PLAUR                                 | 9.40E-03 |
| 26 | 116 | 119 | 7  | Cell Adhesion Molecules Cams            | 1.48E-04 | NCAM1, NLGN1, ICAM1, CLDN4, NRXN2, NRXN1, F11R                      | 2.75E-02 |
| 27 | 111 | 53  | 10 | Cell Cycle                              | 4.10E-11 | CCNA2, TTK, CCNB2, CDC20, MCM2, CCNB1, MAD2L1, BUB1B, PTTG1, CDC25C | 7.63E-09 |
| 27 | 92  | 53  | 7  | Oocyte Meiosis                          | 1.40E-07 | CCNB2, AURKA, CDC20, CCNB1, MAD2L1, PTTG1, CDC25C                   | 1.30E-05 |
| 27 | 73  | 53  | 5  | Progesterone Mediated Oocyte Maturation | 1.63E-05 | CCNA2, CCNB2, CCNB1, MAD2L1, CDC25C                                 | 1.01E-03 |
| 28 | 108 | 55  | 8  | Lysosome                                | 2.77E-08 | HEXB, CTSA, TCIRG1, CTSB, CTSZ, NAGA, CTSS, GM2A                    | 5.14E-06 |
| 28 | 65  | 55  | 4  | Complement And Coagulation Cascades     | 2.14E-04 | SERPINA1, F13A1, PLAUR, C5AR1                                       | 8.97E-03 |
| 28 | 67  | 55  | 4  | Antigen Processing And Presentation     | 2.41E-04 | CTSB, IFI30, CTSS, CD4                                              | 8.97E-03 |
| 28 | 84  | 55  | 4  | Fc Gamma R Mediated Phagocytosis        | 5.73E-04 | ARPC1B, FCGR2B, HCK, SYK                                            | 1.78E-02 |
| 28 | 100 | 55  | 7  | Leukocyte Transendothelial Migration    | 3.23E-07 | ITGB2, SIPA1, CYBA, GNAI2, ITGAM, CXCR4, CYBB                       | 3.00E-05 |
| 28 | 63  | 55  | 4  | Leishmania Infection                    | 1.90E-04 | ITGB2, TGFB1, CYBA, ITGAM                                           | 8.97E-03 |
| 29 | 32  | 30  | 4  | Dna Replication                         | 1.07E-06 | POLE2, RNASEH2A, PCNA, MCM2                                         | 9.97E-05 |
| 29 | 31  | 30  | 3  | Base Excision Repair                    | 5.98E-05 | POLE2, NEIL3, PCNA                                                  | 3.71E-03 |
| 29 | 111 | 30  | 8  | Cell Cycle                              | 2.00E-10 | CDC7, CDKN2C, ORC6L, BUB1B, PCNA, TTK, MCM2, CCNB2                  | 3.71E-08 |
| 37 | 111 | 48  | 8  | Cell Cycle                              | 1.12E-08 | CDC6, CHEK1, CDK2, BUB1, TTK, CCNA2, BUB1B, MAD2L1                  | 2.09E-06 |
| 37 | 73  | 48  | 4  | Progesterone Mediated Oocyte Maturation | 1.98E-04 | CDK2, BUB1, CCNA2, MAD2L1                                           | 1.84E-02 |
| 40 | 32  | 84  | 9  | Dna Replication                         | 6.81E-13 | POLD1, MCM2, MCM7, MCM4, RFC5, FEN1, POLD3, MCM3, RFC4              | 6.33E-11 |

|    |     |    |    |                                        |          |                                                                                                   |          |
|----|-----|----|----|----------------------------------------|----------|---------------------------------------------------------------------------------------------------|----------|
| 40 | 31  | 84 | 3  | Base Excision Repair                   | 1.28E-03 | POLD1, FEN1, POLD3                                                                                | 3.40E-02 |
| 40 | 41  | 84 | 4  | Nucleotide Excision Repair             | 1.83E-04 | POLD1, RFC5, POLD3, RFC4                                                                          | 6.82E-03 |
| 40 | 23  | 84 | 5  | Mismatch Repair                        | 4.46E-07 | EXO1, POLD1, RFC5, POLD3, RFC4                                                                    | 2.77E-05 |
| 40 | 27  | 84 | 5  | Homologous Recombination               | 1.05E-06 | RAD54L, POLD1, BRCA2, MUS81, POLD3                                                                | 4.87E-05 |
| 40 | 111 | 84 | 16 | Cell Cycle                             | 8.89E-14 | CCNE2, BUB1, HDAC2, SKP2, CHEK1, MCM2, MCM7, MCM4, CDK2, BUB1B, SMC3, CDC7, TTK, MCM3, BUB3, PLK1 | 1.65E-11 |
| 40 | 92  | 84 | 5  | Oocyte Meiosis                         | 4.48E-04 | CCNE2, BUB1, CDK2, SMC3, PLK1                                                                     | 1.39E-02 |
| 41 | 218 | 68 | 7  | Cytokine Cytokine Receptor Interaction | 2.20E-04 | CXCL5, IL1R2, CCL20, IL10RA, TNFRSF1B, IL4R, IL6                                                  | 1.02E-02 |
| 41 | 65  | 68 | 5  | Complement And Coagulation Cascades    | 3.14E-05 | C5AR1, C2, F13A1, PLAUR, THBD                                                                     | 2.92E-03 |
| 41 | 90  | 68 | 5  | Toll Like Receptor Signaling Pathway   | 1.50E-04 | MAP3K8, CD14, TLR2, MAPK13, IL6                                                                   | 9.30E-03 |
| 41 | 52  | 68 | 5  | Nod Like Receptor Signaling Pathway    | 1.05E-05 | BIRC3, MAPK13, NOD2, IL6, TNFAIP3                                                                 | 1.95E-03 |
| 41 | 78  | 68 | 4  | Hematopoietic Cell Lineage             | 9.69E-04 | IL1R2, CD14, IL4R, IL6                                                                            | 3.60E-02 |
| 43 | 32  | 54 | 4  | Dna Replication                        | 1.18E-05 | MCM2, PCNA, RNASEH2A, RFC4                                                                        | 7.34E-04 |
| 43 | 111 | 54 | 10 | Cell Cycle                             | 5.00E-11 | CCNB2, MCM2, PCNA, CCNB1, MAD2L1, DBF4, PTTG1, TTK, CDC20, BUB1B                                  | 9.30E-09 |
| 43 | 92  | 54 | 7  | Oocyte Meiosis                         | 1.59E-07 | CCNB2, FBXO5, CCNB1, MAD2L1, PTTG1, CDC20, AURKA                                                  | 1.48E-05 |
| 48 | 90  | 68 | 5  | Toll Like Receptor Signaling Pathway   | 1.50E-04 | CASP8, LY96, TLR1, TLR5, CD86                                                                     | 4.65E-03 |
| 48 | 39  | 68 | 4  | Type I Diabetes Mellitus               | 6.59E-05 | HLA-B, HLA-E, FAS, CD86                                                                           | 3.06E-03 |
| 48 | 42  | 68 | 4  | Autoimmune Thyroid Disease             | 8.86E-05 | HLA-B, HLA-E, FAS, CD86                                                                           | 3.29E-03 |
| 48 | 33  | 68 | 4  | Allograft Rejection                    | 3.36E-05 | HLA-B, HLA-E, FAS, CD86                                                                           | 2.09E-03 |
| 48 | 32  | 68 | 4  | Graft Versus Host Disease              | 2.97E-05 | HLA-B, HLA-E, FAS, CD86                                                                           | 2.09E-03 |
| 48 | 65  | 68 | 5  | Viral Myocarditis                      | 3.14E-05 | HLA-B, ITGB2, HLA-E, CASP8, CD86                                                                  | 2.09E-03 |
| 49 | 218 | 41 | 5  | Cytokine Cytokine Receptor Interaction | 8.19E-04 | IL18, IL10RA, CSF3R, CCR1, CSF1R                                                                  | 2.54E-02 |
| 49 | 116 | 41 | 6  | Cell Adhesion Molecules Cams           | 2.40E-06 | CD4, CD86, ITGB2, PTPRC, HLA-DMA, ITGAM                                                           | 2.23E-04 |
| 49 | 67  | 41 | 3  | Antigen Processing And Presentation    | 1.51E-03 | CD4, CTSS, HLA-DMA                                                                                | 3.51E-02 |
| 49 | 78  | 41 | 4  | Hematopoietic Cell Lineage             | 1.38E-04 | CD4, CSF3R, ITGAM, CSF1R                                                                          | 6.39E-03 |
| 49 | 100 | 41 | 4  | Leukocyte Transendothelial Migration   | 3.58E-04 | NCF4, CYBB, ITGB2, ITGAM                                                                          | 1.33E-02 |
| 49 | 63  | 41 | 5  | Leishmania Infection                   | 2.16E-06 | NCF4, ITGB2, TLR2, HLA-DMA, ITGAM                                                                 | 2.23E-04 |
| 49 | 65  | 41 | 3  | Viral Myocarditis                      | 1.38E-03 | CD86, ITGB2, HLA-DMA                                                                              | 3.51E-02 |
| 51 | 156 | 88 | 6  | Chemokine Signaling Pathway            | 9.70E-04 | DOCK2, HCK, CCR1, LYN, PIK3CG, RAC2                                                               | 1.06E-02 |
| 51 | 116 | 88 | 7  | Cell Adhesion Molecules Cams           | 2.14E-05 | CD86, PTPRC, ITGB2, HLA-DQA1, CD4, HLA-DMB, HLA-DPB1                                              | 4.42E-04 |
| 51 | 65  | 88 | 4  | Complement And Coagulation Cascades    | 1.28E-03 | C1QA, C1QB, SERPINA1, C3AR1                                                                       | 1.33E-02 |

|    |     |    |    |                                              |          |                                                                            |          |
|----|-----|----|----|----------------------------------------------|----------|----------------------------------------------------------------------------|----------|
| 51 | 67  | 88 | 5  | Antigen Processing And Presentation          | 1.26E-04 | HLA-DQA1, CD4, CTSS, HLA-DMB, HLA-DPB1                                     | 1.93E-03 |
| 51 | 90  | 88 | 7  | Toll Like Receptor Signaling Pathway         | 4.00E-06 | CD86, LY96, TLR2, TLR1, CD14, TLR7, PIK3CG                                 | 1.49E-04 |
| 51 | 42  | 88 | 3  | Cytosolic Dna Sensing Pathway                | 3.52E-03 | IL18, PYCARD, CASP1                                                        | 2.98E-02 |
| 51 | 78  | 88 | 4  | Hematopoietic Cell Lineage                   | 2.52E-03 | CD4, FCGR1A, CD14, CSF1R                                                   | 2.23E-02 |
| 51 | 108 | 88 | 6  | Natural Killer Cell Mediated Cytotoxicity    | 1.35E-04 | SYK, ITGB2, FCER1G, LCP2, PIK3CG, RAC2                                     | 1.93E-03 |
| 51 | 68  | 88 | 4  | B Cell Receptor Signaling Pathway            | 1.52E-03 | SYK, LYN, PIK3CG, RAC2                                                     | 1.49E-02 |
| 51 | 72  | 88 | 6  | Fc Epsilon Ri Signaling Pathway              | 1.36E-05 | SYK, FCER1G, LCP2, LYN, PIK3CG, RAC2                                       | 3.16E-04 |
| 51 | 84  | 88 | 10 | Fc Gamma R Mediated Phagocytosis             | 4.57E-10 | SYK, PTPRC, DOCK2, SCIN, HCK, FCGR1A, FCGR2A, LYN, PIK3CG, RAC2            | 4.25E-08 |
| 51 | 100 | 88 | 7  | Leukocyte Transendothelial Migration         | 8.07E-06 | ITGB2, CYBA, NCF2, CYBB, NCF4, PIK3CG, RAC2                                | 2.14E-04 |
| 51 | 39  | 88 | 4  | Intestinal Immune Network For Iga Production | 1.80E-04 | CD86, HLA-DQA1, HLA-DMB, HLA-DPB1                                          | 2.23E-03 |
| 51 | 182 | 88 | 6  | Regulation Of Actin Cytoskeleton             | 2.13E-03 | NCKAP1L, ITGB2, SCIN, CD14, PIK3CG, RAC2                                   | 1.98E-02 |
| 51 | 39  | 88 | 4  | Type I Diabetes Mellitus                     | 1.80E-04 | CD86, HLA-DQA1, HLA-DMB, HLA-DPB1                                          | 2.23E-03 |
| 51 | 63  | 88 | 10 | Leishmania Infection                         | 2.39E-11 | ITGB2, HLA-DQA1, CYBA, TLR2, FCGR1A, FCGR2A, NCF2, NCF4, HLA-DMB, HLA-DPB1 | 4.44E-09 |
| 51 | 25  | 88 | 5  | Asthma                                       | 8.80E-07 | RNASE3, HLA-DQA1, FCER1G, HLA-DMB, HLA-DPB1                                | 4.09E-05 |
| 51 | 42  | 88 | 4  | Autoimmune Thyroid Disease                   | 2.41E-04 | CD86, HLA-DQA1, HLA-DMB, HLA-DPB1                                          | 2.80E-03 |
| 51 | 97  | 88 | 8  | Systemic Lupus Erythematosus                 | 5.01E-07 | CD86, CIQA, HLA-DQA1, C1QB, FCGR1A, FCGR2A, HLA-DMB, HLA-DPB1              | 3.11E-05 |
| 51 | 33  | 88 | 4  | Allograft Rejection                          | 9.27E-05 | CD86, HLA-DQA1, HLA-DMB, HLA-DPB1                                          | 1.57E-03 |
| 51 | 32  | 88 | 4  | Graft Versus Host Disease                    | 8.19E-05 | CD86, HLA-DQA1, HLA-DMB, HLA-DPB1                                          | 1.52E-03 |
| 51 | 65  | 88 | 6  | Viral Myocarditis                            | 7.49E-06 | CD86, ITGB2, HLA-DQA1, HLA-DMB, HLA-DPB1, RAC2                             | 2.14E-04 |
| 52 | 182 | 57 | 6  | Regulation Of Actin Cytoskeleton             | 2.10E-04 | PFN2, PAK7, FGF12, PAK3, CYFIP2, WASF1                                     | 3.91E-02 |
| 54 | 218 | 35 | 5  | Cytokine Cytokine Receptor Interaction       | 3.87E-04 | TNFSF10, LEPR, CSF3R, IL7R, TGFB2                                          | 4.59E-02 |
| 54 | 128 | 35 | 4  | Jak Stat Signaling Pathway                   | 4.94E-04 | LEPR, CSF3R, IL7R, STAT4                                                   | 4.59E-02 |
