# Supplementary material for: A Computational Approach to Identifying Gene-microRNA Modules in Cancer
Source: PubMed Central journal article supplement (PMC4303261; doi:10.1371/journal.pcbi.1004042), 2015-01-22
Supplement: pcbi.1004042.s027.pdf [file pcbi.1004042.s027.pdf]

Table S20. GBM modules with enriched pathways in BioCarta.

| Module ID | m  | k   | x | Gene Ontology          | p-value  | Genes                                           | p-value  |
|-----------|----|-----|---|------------------------|----------|-------------------------------------------------|----------|
| 2         | 20 | 98  | 3 | Atm Pathway            | 5.39E-04 | RAD51, CHEK1, BRCA1                             | 2.34E-02 |
| 2         | 18 | 98  | 8 | Mcm Pathway            | 5.43E-13 | CDT1, ORC6L, MCM2, MCM4, CDC6, MCM3, MCM7, MCM6 | 1.18E-10 |
| 2         | 23 | 98  | 4 | G2 Pathway             | 3.24E-05 | PLK1, CHEK1, BRCA1, CDC25C                      | 2.35E-03 |
| 2         | 20 | 98  | 3 | Atrbrca Pathway        | 5.39E-04 | RAD51, CHEK1, BRCA1                             | 2.34E-02 |
| 2         | 9  | 98  | 4 | Ranms Pathway          | 5.04E-07 | KIF15, AURKA, KPNA2, TPX2                       | 5.47E-05 |
| 3         | 14 | 101 | 3 | Akapcentrosome Pathway | 1.95E-04 | AKAP9, PRKAR2A, PCNT                            | 4.23E-02 |
| 5         | 18 | 56  | 5 | Mcm Pathway            | 1.48E-08 | MCM7, CDK2, MCM2, MCM4, MCM3                    | 3.22E-06 |
| 5         | 20 | 56  | 3 | Atrbrca Pathway        | 1.03E-04 | CHEK1, FANCC, RAD51                             | 1.11E-02 |
| 8         | 11 | 73  | 3 | Blymphocyte Pathway    | 3.41E-05 | ICAM1, FCGR2B, PTPRC                            | 3.70E-03 |
| 8         | 31 | 73  | 3 | Bcr Pathway            | 8.51E-04 | SYK, BTK, LYN                                   | 4.29E-02 |
| 8         | 35 | 73  | 3 | Fcer1 Pathway          | 1.22E-03 | SYK, BTK, LYN                                   | 4.29E-02 |
| 8         | 37 | 73  | 3 | Il2Rb Pathway          | 1.43E-03 | PTPN6, SYK, FAS                                 | 4.29E-02 |
| 8         | 10 | 73  | 3 | Monocyte Pathway       | 2.49E-05 | ICAM1, ITGAM, CD44                              | 3.70E-03 |
| 8         | 27 | 73  | 3 | Nkt Pathway            | 5.63E-04 | CCR5, IL4R, CCR1                                | 4.07E-02 |
| 10        | 18 | 73  | 6 | Mcm Pathway            | 7.05E-10 | ORC2L, CDK2, CDT1, MCM3, MCM4, MCM2             | 1.53E-07 |
| 10        | 27 | 73  | 3 | G1 Pathway             | 5.63E-04 | CDK2, SKP2, HDAC1                               | 4.07E-02 |
| 10        | 12 | 73  | 3 | Rb Pathway             | 4.52E-05 | CHEK1, CDK2, MAPK14                             | 4.91E-03 |
| 11        | 33 | 89  | 3 | Agr Pathway            | 1.81E-03 | PXN, JUN, MAPK1                                 | 1.87E-02 |
| 11        | 30 | 89  | 4 | At1R Pathway           | 6.60E-05 | SHC1, PTK2B, JUN, MAPK1                         | 3.58E-03 |
| 11        | 21 | 89  | 3 | Chemical Pathway       | 4.71E-04 | BAX, PXN, BCL2L1                                | 9.06E-03 |
| 11        | 39 | 89  | 3 | Biopeptides Pathway    | 2.94E-03 | SHC1, PTK2B, MAPK1                              | 2.78E-02 |
| 11        | 22 | 89  | 3 | Ceramide Pathway       | 5.43E-04 | BAX, TNFRSF1A, MAPK1                            | 9.06E-03 |
| 11        | 22 | 89  | 3 | Cxcr4 Pathway          | 5.43E-04 | PXN, PTK2B, MAPK1                               | 9.06E-03 |
| 11        | 23 | 89  | 3 | Ecm Pathway            | 6.21E-04 | SHC1, PXN, MAPK1                                | 9.63E-03 |
| 11        | 30 | 89  | 3 | Fas Pathway            | 1.37E-03 | CFLAR, FAS, JUN                                 | 1.65E-02 |
| 11        | 35 | 89  | 3 | Fcer1 Pathway          | 2.15E-03 | SHC1, JUN, MAPK1                                | 2.12E-02 |
| 11        | 55 | 89  | 3 | Hivnef Pathway         | 7.76E-03 | CFLAR, FAS, TNFRSF1A                            | 4.81E-02 |
| 11        | 37 | 89  | 6 | Il2Rb Pathway          | 2.66E-07 | SHC1, NMI, CFLAR, FAS, BCL2L1, MAPK1            | 5.77E-05 |
| 11        | 26 | 89  | 3 | Raccycd Pathway        | 8.97E-04 | IKBKB, MAPK1, CDKN1A                            | 1.15E-02 |
| 11        | 34 | 89  | 4 | Integrin Pathway       | 1.09E-04 | SHC1, PXN, JUN, MAPK1                           | 3.95E-03 |
| 11        | 45 | 89  | 5 | Keratinocyte Pathway   | 1.91E-05 | FAS, IKBKB, JUN, TNFRSF1A, MAPK1                | 2.07E-03 |
| 11        | 25 | 89  | 4 | Pyk2 Pathway           | 3.13E-05 | SHC1, PTK2B, JUN, MAPK1                         | 2.27E-03 |
| 11        | 86 | 89  | 5 | Mapk Pathway           | 4.28E-04 | SHC1, IKBKB, JUN, RPS6KA3, MAPK1                | 9.06E-03 |
| 11        | 22 | 89  | 3 | Nfkb Pathway           | 5.43E-04 | IKBKB, TNFRSF1A, MYD88                          | 9.06E-03 |
| 11        | 25 | 89  | 3 | Bad Pathway            | 7.98E-04 | BAX, BCL2L1, MAPK1                              | 1.08E-02 |
| 11        | 16 | 89  | 3 | Pml Pathway            | 2.04E-04 | FAS, TNFRSF1A, SP100                            | 5.53E-03 |
| 11        | 31 | 89  | 3 | Il1R Pathway           | 1.51E-03 | IKBKB, JUN, MYD88                               | 1.72E-02 |
| 11        | 34 | 89  | 4 | Met Pathway            | 1.09E-04 | PXN, PTK2B, JUN, MAPK1                          | 3.95E-03 |
| 11        | 16 | 89  | 3 | Spry Pathway           | 2.04E-04 | SHC1, SPRY1, MAPK1                              | 5.53E-03 |
| 11        | 25 | 89  | 3 | Stress Pathway         | 7.98E-04 | IKBKB, JUN, TNFRSF1A                            | 1.08E-02 |
| 11        | 32 | 89  | 3 | Toll Pathway           | 1.66E-03 | IKBKB, JUN, MYD88                               | 1.80E-02 |
| 16        | 20 | 93  | 4 | Atm Pathway            | 1.47E-05 | CHEK1, CHEK2, RAD51, BRCA1                      | 7.97E-04 |
| 16        | 18 | 93  | 5 | Mcm Pathway            | 1.95E-07 | CDC6, CDT1, MCM4, ORC1L, CDK2                   | 2.12E-05 |
| 16        | 27 | 93  | 3 | G1 Pathway             | 1.14E-03 | SKP2, CDK2, CDC25A                              | 3.54E-02 |
| 16        | 23 | 93  | 6 | G2 Pathway             | 1.64E-08 | CHEK1, CHEK2, PLK1, BRCA1, CDC25C, CDC25A       | 3.55E-06 |

|    |    |    |   |                      |          |                                    |          |
|----|----|----|---|----------------------|----------|------------------------------------|----------|
| 16 | 12 | 93 | 3 | Rb Pathway           | 9.33E-05 | CHEK1, CDC25C, CDK2                | 3.37E-03 |
| 16 | 20 | 93 | 5 | Atrbrca Pathway      | 3.49E-07 | CHEK1, CHEK2, RAD51, BRCA2, BRCA1  | 2.52E-05 |
| 16 | 9  | 93 | 3 | Ranms Pathway        | 3.62E-05 | AURKA, KIF15, TPX2                 | 1.57E-03 |
| 17 | 14 | 59 | 3 | Plateletapp Pathway  | 3.91E-05 | PLAU, COL4A2, SERPINE1             | 8.49E-03 |
| 20 | 10 | 74 | 3 | Gaba Pathway         | 2.59E-05 | GABRA1, DNMI, GABRA5               | 5.62E-03 |
| 24 | 55 | 38 | 3 | Hivnef Pathway       | 6.79E-04 | RIPK1, NFKB1, PRKCD                | 3.21E-02 |
| 24 | 45 | 38 | 3 | Keratinocyte Pathway | 3.75E-04 | RIPK1, NFKB1, PRKCD                | 3.21E-02 |
| 24 | 86 | 38 | 3 | Mapk Pathway         | 2.48E-03 | RIPK1, TGFBR1, NFKB1               | 3.84E-02 |
| 24 | 24 | 38 | 4 | Nthi Pathway         | 8.56E-07 | TGFBR1, TGFBR2, NFKB1, TLR2        | 1.86E-04 |
| 25 | 12 | 75 | 3 | Fibrinolysis Pathway | 4.90E-05 | PLAU, SERPINE1, F13A1              | 1.06E-02 |
| 32 | 22 | 71 | 4 | Mtor Pathway         | 7.49E-06 | PDPK1, EIF3A, RPS6KB1, EIF4G3      | 1.63E-03 |
| 32 | 22 | 71 | 3 | Eif4 Pathway         | 2.79E-04 | PDPK1, RPS6KB1, EIF4G3             | 3.03E-02 |
| 40 | 18 | 84 | 6 | Mcm Pathway          | 1.67E-09 | CDT1, MCM2, MCM7, MCM4, CDK2, MCM3 | 3.62E-07 |
| 40 | 23 | 84 | 3 | G2 Pathway           | 5.24E-04 | CHEK1, BRCA1, PLK1                 | 3.79E-02 |
| 40 | 20 | 84 | 4 | Atrbrca Pathway      | 9.80E-06 | FANCC, CHEK1, BRCA2, BRCA1         | 1.06E-03 |
| 41 | 17 | 68 | 3 | Il10 Pathway         | 1.11E-04 | IL10RA, HMOX1, IL6                 | 2.40E-02 |
| 49 | 13 | 41 | 3 | Thelper Pathway      | 1.02E-05 | CD4, ITGB2, PTPRC                  | 2.22E-03 |
| 51 | 35 | 88 | 4 | Fcer1 Pathway        | 1.17E-04 | SYK, FCER1G, LYN, PIK3CG           | 8.48E-03 |
| 51 | 25 | 88 | 3 | Bad Pathway          | 7.72E-04 | RPS6KA1, CSF2RB, PIK3CG            | 4.19E-02 |
| 51 | 13 | 88 | 3 | Thelper Pathway      | 1.02E-04 | PTPRC, ITGB2, CD4                  | 8.48E-03 |
| 51 | 32 | 88 | 4 | Toll Pathway         | 8.19E-05 | LY96, TLR2, CD14, TLR7             | 8.48E-03 |
