# Supplementary material for: A Computational Approach to Identifying Gene-microRNA Modules in Cancer
Source: PubMed Central journal article supplement (PMC4303261; doi:10.1371/journal.pcbi.1004042), 2015-01-22
Supplement: pcbi.1004042.s030.pdf [file pcbi.1004042.s030.pdf]

**Table S23. Ovarian cancer modules enriched with GO terms using a TANGO tool.**

| Module ID | x  | Description                                       | p-value  | q-value | Frequency | Genes                                                                                                          |
|-----------|----|---------------------------------------------------|----------|---------|-----------|----------------------------------------------------------------------------------------------------------------|
| 2         | 13 | Leukocyte Activation                              | 6.94E-10 | 0.001   | 0.22      | PSMB10, MEF2C, LYN, PTPN22, VAV1, CD74, BTK, DOCK2, LCK, CD4, BLNK, LCP2, TYROBP                               |
| 2         | 11 | Positive Regulation Of Leukocyte Activation       | 3.75E-09 | 0.001   | 0.19      | MEF2C, LYN, FGR, IL18, ICOS, LCK, CD4, VAV1, CD27, CD74, BTK                                                   |
| 2         | 10 | Immune Response-Regulating Signaling Pathway      | 3.11E-08 | 0.002   | 0.17      | MEF2C, LYN, FGR, HCK, LCK, PTPN22, CD4, CTSH, LCP2, BTK                                                        |
| 2         | 11 | Response To Bacterium                             | 9.03E-08 | 0.002   | 0.19      | MEF2C, LYN, FGR, CCR5, CXCL13, HCK, IL18, MMP9, ACP5, CD4, CXCL10                                              |
| 2         | 10 | Regulation Of Cell Adhesion                       | 1.70E-07 | 0.005   | 0.17      | LPXN, LYN, CD44, CCR5, CXCL13, IL18, CYTH4, VAV1, ARHGDIB, SPP1                                                |
| 2         | 9  | Leukocyte Differentiation                         | 3.14E-07 | 0.01    | 0.15      | MEF2C, DOCK2, LYN, MMP9, LCK, PTPN22, CD4, CD74, BLNK                                                          |
| 2         | 7  | Adaptive Immune Response                          | 5.67E-07 | 0.014   | 0.12      | MEF2C, CXCL13, IL18, CTSH, CD27, CD74, BTK                                                                     |
| 2         | 5  | Regulation Of Leukocyte Apoptotic Process         | 1.36E-06 | 0.025   | 0.085     | MEF2C, LYN, CCR5, CD74, BTK                                                                                    |
| 2         | 8  | Regulation Of Immune Effector Process             | 2.59E-06 | 0.042   | 0.14      | DOCK2, LYN, FGR, HCK, LCK, CD4, CD74, BTK                                                                      |
| 3         | 17 | Interphase Of Mitotic Cell Cycle                  | 1.26E-18 | 0.001   | 0.49      | E2F1, GINS1, CDC6, GINS2, POLA2, MCM2, MCM10, MCM4, CDK2, CEP70, CCNE2, CDC45, CCNB2, MCM7, PLK1, TFDP2, TUBG1 |
| 3         | 12 | Cell Cycle Checkpoint                             | 3.08E-13 | 0.001   | 0.34      | E2F1, CCNE2, CDC6, CDC45, MCM7, CCNB2, PLK1, BUB1, MCM2, MCM10, MCM4, CDK2                                     |
| 3         | 7  | Dna Strand Elongation Involved In Dna Replication | 2.83E-12 | 0.001   | 0.2       | GINS1, GINS2, CDC45, MCM7, MCM2, POLA2, MCM4                                                                   |
| 3         | 10 | Dna Replication                                   | 2.75E-11 | 0.001   | 0.29      | GINS1, GINS2, CDC6, CDC45, MCM7, MCM2, POLA2, MCM10, MCM4, CDK2                                                |
| 3         | 8  | M/G1 Transition Of Mitotic Cell Cycle             | 3.51E-11 | 0.001   | 0.23      | CDC6, CDC45, MCM7, MCM2, POLA2, MCM10, MCM4, CDK2                                                              |
| 3         | 5  | Dna-Dependent Dna Replication Initiation          | 2.65E-09 | 0.001   | 0.14      | CDC45, MCM7, MCM2, POLA2, MCM4                                                                                 |
| 3         | 8  | Mitosis                                           | 4.30E-07 | 0.013   | 0.23      | KIF22, CDC6, CCNB2, PLK1, BUB1, CEP55, ASPM, CDK2                                                              |
| 4         | 5  | Cilium Morphogenesis                              | 2.93E-06 | 0.049   | 0.1       | TMEM231, FOXJ1, DNAAF1, TCTN1, DNAI2                                                                           |
| 6         | 12 | Dna Replication                                   | 1.47E-14 | 0.001   | 0.35      | CDC7, PRIM1, RFC5, POLE2, PCNA, CHEK1, MCM2, MCM4, CDK2, CDC25A, FEN1, MCM6                                    |
| 6         | 14 | Interphase Of Mitotic Cell Cycle                  | 2.66E-14 | 0.001   | 0.41      | CDC7, PRIM1, RFC5, CCNE2, POLE2, PCNA, CHEK1, MCM2, CDKN3, MCM4, CDK2, CDC25A, FEN1, MCM6                      |
| 6         | 11 | G1/S Transition Of Mitotic Cell Cycle             | 1.71E-13 | 0.001   | 0.32      | CDC7, PRIM1, CCNE2, POLE2, PCNA, MCM2, CDKN3, MCM4, CDK2, CDC25A, MCM6                                         |
| 6         | 10 | S Phase Of Mitotic Cell Cycle                     | 2.62E-13 | 0.001   | 0.29      | PRIM1, RFC5, POLE2, PCNA, MCM2, MCM4, CDK2, CDC25A, FEN1, MCM6                                                 |
| 6         | 7  | Dna Strand Elongation Involved In Dna Replication | 2.28E-12 | 0.001   | 0.21      | PRIM1, RFC5, PCNA, MCM2, MCM4, FEN1, MCM6                                                                      |
| 6         | 11 | Cell Cycle Checkpoint                             | 6.43E-12 | 0.001   | 0.32      | CDC7, RFC5, CCNE2, KNTC1, BUB1, CHEK1, MCM2, MCM4, CDK2, CDC25A, MCM6                                          |

|    |    |                                                        |          |       |       |                                                                                                                                           |
|----|----|--------------------------------------------------------|----------|-------|-------|-------------------------------------------------------------------------------------------------------------------------------------------|
| 6  | 10 | Mitosis                                                | 1.04E-09 | 0.001 | 0.29  | KIF23, TIMELESS, DSN1, KIF15, KNTC1, BUB1, CEP55, RACGAP1, CDK2, CDC25A                                                                   |
| 6  | 5  | Dna-Dependent Dna Replication Initiation               | 2.29E-09 | 0.001 | 0.15  | PRIM1, POLE2, MCM2, MCM4, MCM6                                                                                                            |
| 6  | 5  | Telomere Maintenance Via Semi-Conservative Replication | 2.99E-09 | 0.001 | 0.15  | PRIM1, RFC5, POLE2, PCNA, FEN1                                                                                                            |
| 6  | 9  | Dna Repair                                             | 9.72E-08 | 0.002 | 0.26  | RFC5, MSH6, POLE2, PCNA, CHEK1, PARP2, CDK2, FEN1, BARD1                                                                                  |
| 8  | 7  | Regulation Of Cell-Substrate Adhesion                  | 1.22E-08 | 0.001 | 0.18  | CCL21, LGALS1, SERPINE1, COL1A1, THBS1, ITGB1, PLAU                                                                                       |
| 8  | 9  | Blood Vessel Morphogenesis                             | 2.99E-07 | 0.009 | 0.23  | ITGA5, SERPINE1, MMP19, PDGFRB, THBS1, ITGB1, PLAU, MYLK, FN1                                                                             |
| 8  | 4  | Peptide Cross-Linking                                  | 1.05E-06 | 0.02  | 0.1   | BGN, COL3A1, THBS1, FN1                                                                                                                   |
| 8  | 5  | Response To Amino Acid Stimulus                        | 1.88E-06 | 0.031 | 0.13  | COL3A1, COL1A2, COL1A1, COL16A1, TIMP3                                                                                                    |
| 8  | 7  | Platelet Activation                                    | 2.47E-06 | 0.041 | 0.18  | SERPINE1, COL3A1, COL1A2, TUBA4A, COL1A1, THBS1, FN1                                                                                      |
| 8  | 4  | Collagen Metabolic Process                             | 2.68E-06 | 0.042 | 0.1   | MMP19, COL3A1, COL1A1, MMP11                                                                                                              |
| 12 | 10 | Interphase Of Mitotic Cell Cycle                       | 4.68E-09 | 0.001 | 0.3   | PRIM1, RFC5, E2F3, NBN, PSMA5, GMNN, TFDP2, MCM2, MCM10, FEN1                                                                             |
| 12 | 4  | Dna Strand Elongation Involved In Dna Replication      | 1.54E-06 | 0.028 | 0.12  | PRIM1, RFC5, MCM2, FEN1                                                                                                                   |
| 13 | 21 | Interphase Of Mitotic Cell Cycle                       | 1.41E-16 | 0.001 | 0.27  | CDC6, GINS2, DBF4, GMNN, CHEK1, BIRC5, MCM10, MCM6, CCNE2, PSMB4, EIF4EBP1, CDC45, MCM7, POLE2, PLK1, TFDP2, PCNA, ORC5, ORC1, MELK, ORC2 |
| 13 | 18 | Cell Cycle Checkpoint                                  | 6.03E-16 | 0.001 | 0.23  | CDC6, DBF4, CHEK1, BIRC5, MCM10, MCM6, RAD1, CCNE2, PSMB4, CDC45, MCM7, PLK1, BUB1, ORC5, FANCG, ORC1, BUB3, ORC2                         |
| 13 | 16 | Dna Replication                                        | 6.02E-15 | 0.001 | 0.21  | POLL, CDC6, GINS2, DBF4, CHEK1, MCM10, MCM6, RAD1, TFAM, CDC45, MCM7, POLE2, PCNA, ORC5, ORC1, ORC2                                       |
| 13 | 12 | M/G1 Transition Of Mitotic Cell Cycle                  | 4.19E-14 | 0.001 | 0.16  | PSMB4, CDC6, CDC45, MCM7, POLE2, GMNN, DBF4, ORC5, MCM10, ORC1, ORC2, MCM6                                                                |
| 13 | 14 | G1/S Transition Of Mitotic Cell Cycle                  | 4.81E-13 | 0.001 | 0.18  | CDC6, DBF4, MCM10, MCM6, CCNE2, PSMB4, EIF4EBP1, CDC45, MCM7, POLE2, PCNA, ORC5, ORC1, ORC2                                               |
| 13 | 10 | Dna-Dependent Dna Replication                          | 1.49E-11 | 0.001 | 0.13  | GINS2, TFAM, CDC45, MCM7, POLE2, PCNA, ORC5, ORC1, ORC2, MCM6                                                                             |
| 13 | 7  | Dna-Dependent Dna Replication Initiation               | 2.89E-11 | 0.001 | 0.091 | CDC45, MCM7, POLE2, ORC5, ORC1, ORC2, MCM6                                                                                                |
| 13 | 6  | Regulation Of Chromosome Segregation                   | 1.15E-09 | 0.001 | 0.078 | CDC42, CDC6, BUB1, AURKB, ECT2, BUB3                                                                                                      |
| 13 | 13 | Mitosis                                                | 5.27E-09 | 0.001 | 0.17  | CDC6, HAUS6, NCAPH, CDCA8, TIMELESS, PLK1, DSN1, BUB1, BIRC5, AURKB, SMC2, BUB3, SMC4                                                     |
| 13 | 8  | Regulation Of Nuclear Division                         | 1.98E-08 | 0.002 | 0.1   | CDC42, CDC6, AURKAIP1, PLK1, BUB1, RANBP1, CHEK1, BUB3                                                                                    |
| 13 | 12 | Regulation Of Mitotic Cell Cycle                       | 1.12E-07 | 0.002 | 0.16  | CDC42, PSMB4, CDC6, CDC45, EIF4EBP1, AURKAIP1, PLK1, BUB1, RANBP1, BIRC5, CHEK1, BUB3                                                     |
| 13 | 4  | Regulation Of Cell Cycle Cytokinesis                   | 1.16E-06 | 0.021 | 0.052 | CDC42, CDC6, AURKB, ECT2                                                                                                                  |

|    |    |                                                                                                |          |       |      |                                                                                                                                                                                      |
|----|----|------------------------------------------------------------------------------------------------|----------|-------|------|--------------------------------------------------------------------------------------------------------------------------------------------------------------------------------------|
| 13 | 11 | Dna Repair                                                                                     | 2.68E-06 | 0.042 | 0.14 | EXO1, RAD1, POLL, POLE2, UCHL5, PCNA, FANCE, CHEK1, FANCG, SMC2, SMC4                                                                                                                |
| 18 | 12 | Regulation Of Cell Cycle Arrest                                                                | 1.72E-13 | 0.001 | 0.39 | CDC7, RFC5, CCNE2, MCM7, FOXM1, KNTC1, CHEK1, MCM2, FANCG, MCM3, MCM4, MCM6                                                                                                          |
| 18 | 11 | Dna Replication                                                                                | 1.80E-13 | 0.001 | 0.35 | CDC7, RFC5, MCM7, NASP, CHEK1, MCM2, MCM3, MCM4, FEN1, MCM6, SLBP                                                                                                                    |
| 18 | 13 | Interphase                                                                                     | 2.05E-13 | 0.001 | 0.42 | CDC7, RFC5, CCNE2, MCM7, FOXM1, CHEK1, MCM2, MCM3, MCM4, FEN1, MELK, MCM6, SLBP                                                                                                      |
| 18 | 7  | Dna Strand Elongation Involved In Dna Replication                                              | 1.12E-12 | 0.001 | 0.23 | RFC5, MCM7, MCM2, MCM3, MCM4, FEN1, MCM6                                                                                                                                             |
| 18 | 8  | Dna Repair                                                                                     | 6.37E-07 | 0.016 | 0.26 | EXO1, RFC5, FOXM1, CHEK1, TOPBP1, FANCG, FEN1, SMC4                                                                                                                                  |
| 18 | 4  | Regulation Of S Phase                                                                          | 6.66E-07 | 0.016 | 0.13 | CDC7, TIMELESS, CHEK1, SLBP                                                                                                                                                          |
| 18 | 7  | Mitosis                                                                                        | 2.52E-06 | 0.042 | 0.23 | KIF23, TIMELESS, DSN1, KNTC1, AURKB, RACGAP1, SMC4                                                                                                                                   |
| 20 | 26 | Mitosis                                                                                        | 3.82E-33 | 0.001 | 0.59 | KIF23, NEK2, AURKA, CEP55, AURKB, MYBL2, SPC25, NCAPH, CDCA8, CENPA, BUB1, CCNA2, ASPM, CDCA3, ERCC6L, KIF15, CENPE, BIRC5, CDC20, RACGAP1, CCNB1, MAD2L1, CCNB2, SPAG5, PLK1, BUB1B |
| 20 | 13 | Mitotic Prometaphase                                                                           | 2.13E-19 | 0.001 | 0.3  | CCNB1, SPC25, CDCA8, MAD2L1, PLK1, CENPA, BUB1, BUB1B, CENPE, BIRC5, CDC20, AURKB, ERCC6L                                                                                            |
| 20 | 17 | Microtubule-Based Process                                                                      | 2.22E-17 | 0.001 | 0.39 | KIF14, KIF23, KIF4A, NEK2, KIF15, CENPE, AURKA, AURKB, RACGAP1, MYBL2, GTSE1, SPC25, PLK4, PLK1, CENPA, SPAG5, BUB1B                                                                 |
| 20 | 11 | Chromosome Segregation                                                                         | 5.43E-14 | 0.001 | 0.25 | CCNB1, SPC25, NCAPH, MAD2L1, NEK2, SPAG5, BUB1, CENPE, BIRC5, AURKB, TOP2A                                                                                                           |
| 20 | 9  | Spindle Organization                                                                           | 1.28E-12 | 0.001 | 0.2  | KIF23, SPC25, NEK2, SPAG5, BUB1B, AURKA, AURKB, RACGAP1, MYBL2                                                                                                                       |
| 20 | 10 | G2/M Transition Of Mitotic Cell Cycle                                                          | 1.47E-11 | 0.001 | 0.23 | CCNB1, PLK4, CCNB2, PLK1, NEK2, FOXM1, BIRC5, TOP2A, CCNA2, MELK                                                                                                                     |
| 20 | 12 | Regulation Of Cell Cycle Arrest                                                                | 2.03E-11 | 0.001 | 0.27 | CCNB1, MAD2L1, CCNB2, PLK1, FOXM1, BUB1, BUB1B, BIRC5, CDC20, TOP2A, CCNA2, GTSE1                                                                                                    |
| 20 | 6  | Regulation Of Chromosome Segregation                                                           | 3.56E-11 | 0.001 | 0.14 | CCNB1, NEK2, SPAG5, BUB1, AURKB, RACGAP1                                                                                                                                             |
| 20 | 12 | Regulation Of Mitotic Cell Cycle                                                               | 1.32E-10 | 0.001 | 0.27 | CCNB1, MAD2L1, PLK1, NEK2, BUB1, BUB1B, AURKA, BIRC5, CDC20, TOP2A, CCNA2, GTSE1                                                                                                     |
| 20 | 6  | Spindle Checkpoint                                                                             | 7.04E-10 | 0.001 | 0.14 | CCNB1, MAD2L1, BUB1, BUB1B, BIRC5, CDC20                                                                                                                                             |
| 20 | 7  | Organelle Assembly                                                                             | 7.72E-09 | 0.001 | 0.16 | KIF23, NEK2, CENPA, CENPE, AURKB, RACGAP1, MYBL2                                                                                                                                     |
| 20 | 7  | Anaphase-Promoting Complex-Dependent Proteasomal Ubiquitin-Dependent Protein Catabolic Process | 7.72E-09 | 0.001 | 0.16 | CCNB1, MAD2L1, PLK1, BUB1B, AURKA, CDC20, AURKB                                                                                                                                      |
| 20 | 7  | Regulation Of Nuclear Division                                                                 | 7.72E-09 | 0.001 | 0.16 | MAD2L1, PLK1, NEK2, BUB1, BUB1B, AURKA, CDC20                                                                                                                                        |

|    |    |                                                     |          |       |       |                                                                                                                           |
|----|----|-----------------------------------------------------|----------|-------|-------|---------------------------------------------------------------------------------------------------------------------------|
| 20 | 8  | Positive Regulation Of Cell Cycle Process           | 4.55E-08 | 0.002 | 0.18  | KIF23, PLK4, PLK1, AURKA, BIRC5, AURKB, RACGAP1, GTSE1                                                                    |
| 20 | 6  | Regulation Of Microtubule Cytoskeleton Organization | 1.50E-07 | 0.005 | 0.14  | CCNB1, PLK4, NEK2, SPAG5, AURKA, RACGAP1                                                                                  |
| 20 | 4  | Protein Localization To Chromosome                  | 6.47E-07 | 0.016 | 0.091 | PLK1, CENPA, BUB1B, AURKB                                                                                                 |
| 21 | 7  | Activation Of Immune Response                       | 8.41E-07 | 0.02  | 0.23  | C1QA, ITK, HCK, LCK, MND4, LCP2, BTK                                                                                      |
| 22 | 10 | Extracellular Matrix Organization                   | 2.27E-13 | 0.001 | 0.37  | COL3A1, COL1A1, GREM1, LOXL2, COL5A3, MMP2, COL5A1, MMP1, MMP11, DPT                                                      |
| 22 | 7  | Collagen Metabolic Process                          | 2.91E-13 | 0.001 | 0.26  | MMP19, COL3A1, COL1A1, MMP2, COL5A1, MMP1, MMP11                                                                          |
| 22 | 7  | Collagen Fibril Organization                        | 3.79E-13 | 0.001 | 0.26  | COL3A1, COL1A1, GREM1, LOXL2, COL5A3, COL5A1, DPT                                                                         |
| 22 | 8  | Angiogenesis                                        | 2.24E-08 | 0.002 | 0.3   | ITGA5, MMP19, GREM1, LOXL2, ECM1, MMP2, PLAU, FN1                                                                         |
| 22 | 4  | Cellular Response To Amino Acid Stimulus            | 8.64E-07 | 0.02  | 0.15  | COL3A1, COL6A1, COL1A1, MMP2                                                                                              |
| 22 | 4  | Skin Development                                    | 2.83E-06 | 0.045 | 0.15  | COL3A1, COL1A1, COL5A3, COL5A1                                                                                            |
| 25 | 15 | Interphase Of Mitotic Cell Cycle                    | 4.14E-17 | 0.001 | 0.52  | CDC7, CHEK1, MCM2, MCM10, MCM4, MCM6, CCNE2, CCNB2, MCM7, POLE2, PCNA, FBXO5, KPNA2, FEN1, MELK                           |
| 25 | 11 | Dna Replication                                     | 7.52E-14 | 0.001 | 0.38  | CDC7, MCM7, POLE2, PCNA, TIPIN, CHEK1, MCM2, MCM10, MCM4, FEN1, MCM6                                                      |
| 25 | 8  | Dna-Dependent Dna Replication                       | 2.91E-12 | 0.001 | 0.28  | MCM7, POLE2, PCNA, TIPIN, MCM2, MCM4, FEN1, MCM6                                                                          |
| 25 | 11 | Mitosis                                             | 6.26E-12 | 0.001 | 0.38  | KIF23, CCNB2, TIMELESS, DSN1, KIF15, TIPIN, FBXO5, NDC80, RACGAP1, MYBL2, SMC4                                            |
| 25 | 10 | Cell Cycle Checkpoint                               | 2.90E-11 | 0.001 | 0.34  | CDC7, CCNE2, MCM7, CCNB2, TIPIN, CHEK1, MCM2, MCM10, MCM4, MCM6                                                           |
| 25 | 7  | M/G1 Transition Of Mitotic Cell Cycle               | 4.20E-10 | 0.001 | 0.24  | CDC7, MCM7, POLE2, MCM2, MCM10, MCM4, MCM6                                                                                |
| 25 | 5  | Dna-Dependent Dna Replication Initiation            | 9.79E-10 | 0.001 | 0.17  | MCM7, POLE2, MCM2, MCM4, MCM6                                                                                             |
| 25 | 4  | Dna Unwinding Involved In Replication               | 2.12E-09 | 0.001 | 0.14  | MCM7, MCM2, MCM4, MCM6                                                                                                    |
| 25 | 5  | Mitotic Spindle Organization                        | 5.01E-09 | 0.001 | 0.17  | KIF23, PRC1, NDC80, RACGAP1, MYBL2                                                                                        |
| 25 | 9  | Microtubule-Based Process                           | 8.30E-09 | 0.001 | 0.31  | KIF23, KIF4A, PRC1, KIF15, FBXO5, NDC80, RACGAP1, MYBL2, KPNA2                                                            |
| 25 | 4  | Regulation Of S Phase                               | 5.07E-07 | 0.013 | 0.14  | CDC7, TIMELESS, TIPIN, CHEK1                                                                                              |
| 25 | 4  | Spindle Assembly                                    | 1.02E-06 | 0.02  | 0.14  | KIF23, FBXO5, RACGAP1, MYBL2                                                                                              |
| 26 | 19 | Interphase Of Mitotic Cell Cycle                    | 1.88E-19 | 0.001 | 0.43  | CDC7, GINS2, GMNN, CHEK1, BIRC5, PSMA7, MCM10, MCM4, RPA3, CCNB1, RFC5, PLK4, RFC4, PLK1, PCNA, FBXO5, CCNA2, KPNA2, FEN1 |
| 26 | 13 | Cell Cycle Checkpoint                               | 2.78E-13 | 0.001 | 0.3   | CDC7, CHEK1, BIRC5, PSMA7, MCM10, MCM4, RPA3, RFC5, CCNB1, MAD2L1, RFC4, PLK1, CCNA2                                      |
| 26 | 13 | Mitosis                                             | 2.89E-12 | 0.001 | 0.3   | CENPN, DSN1, RAN, DYNLT1, BIRC5, CCNB1, SPC25, MAD2L1, TIMELESS, CENPA, PLK1, FBXO5, CCNA2                                |
| 26 | 7  | Dna Strand Elongation Involved In Dna Replication   | 1.59E-11 | 0.001 | 0.16  | RFC5, GINS2, RFC4, PCNA, MCM4, FEN1, RPA3                                                                                 |

|    |    |                                             |          |       |       |                                                                                                                                                                                                                                           |
|----|----|---------------------------------------------|----------|-------|-------|-------------------------------------------------------------------------------------------------------------------------------------------------------------------------------------------------------------------------------------------|
| 26 | 10 | Dna Replication                             | 3.34E-10 | 0.001 | 0.23  | CDC7, RFC5, GINS2, RFC4, PCNA, CHEK1, MCM10, MCM4, FEN1, RPA3                                                                                                                                                                             |
| 26 | 8  | Microtubule Cytoskeleton Organization       | 2.81E-07 | 0.009 | 0.18  | SPC25, PLK4, RAN, PLK1, CENPA, FBXO5, RANBP1, DYNLT1                                                                                                                                                                                      |
| 26 | 9  | Regulation Of Mitotic Cell Cycle            | 4.10E-07 | 0.013 | 0.2   | CCNB1, MAD2L1, PLK1, FBXO5, RANBP1, BIRC5, CHEK1, PSMA7, CCNA2                                                                                                                                                                            |
| 26 | 7  | Dna Recombination                           | 7.29E-07 | 0.017 | 0.16  | RFC5, XRCC4, RFC4, UCHL5, PCNA, FEN1, RPA3                                                                                                                                                                                                |
| 26 | 6  | Regulation Of Ligase Activity               | 8.29E-07 | 0.019 | 0.14  | CCNB1, XRCC4, MAD2L1, PLK1, FBXO5, PSMA7                                                                                                                                                                                                  |
| 27 | 9  | Collagen Fibril Organization                | 1.05E-14 | 0.001 | 0.16  | COL3A1, COL1A2, LOX, COL1A1, GREM1, LOXL2, COL11A1, COL5A2, COL5A1                                                                                                                                                                        |
| 27 | 13 | Extracellular Matrix Organization           | 3.68E-14 | 0.001 | 0.24  | COL3A1, COL1A2, LOX, COL1A1, MMP14, GREM1, LOXL2, ECM2, COL11A1, COL5A2, MMP2, COL5A1, MMP11                                                                                                                                              |
| 27 | 7  | Cellular Response To Amino Acid Stimulus    | 1.31E-10 | 0.001 | 0.13  | COL4A1, COL3A1, COL1A2, COL1A1, COL16A1, COL5A2, MMP2                                                                                                                                                                                     |
| 27 | 12 | Angiogenesis                                | 3.07E-10 | 0.001 | 0.22  | COL4A1, SRPX2, MMP19, PDGFRB, MMP14, THBS1, GREM1, LOXL2, ECM1, MMP2, PLAU, FN1                                                                                                                                                           |
| 27 | 6  | Collagen Metabolic Process                  | 4.38E-09 | 0.001 | 0.11  | MMP19, COL3A1, COL1A1, MMP2, COL5A1, MMP11                                                                                                                                                                                                |
| 27 | 5  | Peptide Cross-Linking                       | 7.38E-08 | 0.002 | 0.091 | BGN, COL3A1, DCN, THBS1, FN1                                                                                                                                                                                                              |
| 27 | 8  | Ossification                                | 5.07E-07 | 0.013 | 0.15  | CTSK, SPARC, COL1A1, MMP14, COL11A1, ECM1, MMP2, TWIST1                                                                                                                                                                                   |
| 27 | 5  | Skin Development                            | 1.76E-06 | 0.031 | 0.091 | COL3A1, COL1A2, COL1A1, COL5A2, COL5A1                                                                                                                                                                                                    |
| 31 | 11 | Response To Type I Interferon               | 8.04E-15 | 0.001 | 0.17  | IRF9, USP18, OASL, SP100, ISG15, OAS3, IRF1, IRF2, OAS1, OAS2, STAT1                                                                                                                                                                      |
| 31 | 11 | Cellular Response To Interferon-Gamma       | 1.22E-13 | 0.001 | 0.17  | IRF9, OASL, SP100, OAS3, IRF1, IRF2, OAS1, OAS2, STAT1, CCL5, GBP1                                                                                                                                                                        |
| 31 | 16 | Cytokine-Mediated Signaling Pathway         | 1.73E-12 | 0.001 | 0.25  | SP100, OAS3, HERC5, OAS1, OAS2, STAT1, CCL5, STAT3, IRF9, USP18, OASL, ISG15, IRF1, PYCARD, IRF2, GBP1                                                                                                                                    |
| 31 | 13 | Response To Virus                           | 6.69E-12 | 0.001 | 0.2   | OAS3, HERC5, CXCL9, OAS1, OAS2, STAT1, CCL5, TRIM22, CXCL10, IRF9, OASL, ISG15, IRF1                                                                                                                                                      |
| 31 | 6  | Negative Regulation Of Reproductive Process | 1.64E-07 | 0.005 | 0.094 | OASL, SP100, SERPINF1, OAS3, OAS1, CCL5                                                                                                                                                                                                   |
| 31 | 9  | Immune Effector Process                     | 5.85E-07 | 0.015 | 0.14  | C1QA, LYN, OAS3, IRF1, CXCL9, OAS1, S100A13, CXCL10, RAB27A                                                                                                                                                                               |
| 31 | 4  | Adenylyltransferase Activity                | 1.41E-06 | 0.027 | 0.063 | OASL, OAS3, OAS1, OAS2                                                                                                                                                                                                                    |
| 33 | 34 | M Phase Of Mitotic Cell Cycle               | 2.04E-43 | 0.001 | 0.61  | KIF23, KIFC1, AURKA, AURKB, CEP55, SPC25, NCAPH, CDCA8, CENPA, OIP5, NCAPG, BUB1, FBXO5, CCNA2, ASPM, KIF11, DLGAP5, KIF15, TPX2, CENPF, NUSAP1, CDC20, ESPL1, NDC80, BIRC5, PBK, RACGAP1, UBE2C, SMC4, CCNB2, PLK1, SPAG5, BUB1B, KIF20A |
| 33 | 26 | Microtubule-Based Process                   | 1.45E-28 | 0.001 | 0.46  | KIF14, KIF23, KIFC1, KIF4A, KIF11, PRC1, DLGAP5, KIF15, TTK, NUSAP1, NDC80, AURKA, ESPL1, AURKB, UBE2C, TACC3, RACGAP1, SPC25, CENPA, SPAG5, PLK1, CKS2, FBXO5, BUB1B, KPNA2, KIF20A                                                      |

|    |    |                                                                                                |          |       |       |                                                                                                              |
|----|----|------------------------------------------------------------------------------------------------|----------|-------|-------|--------------------------------------------------------------------------------------------------------------|
| 33 | 16 | Spindle Organization                                                                           | 2.25E-24 | 0.001 | 0.29  | KIF23, KIF11, PRC1, TTK, NDC80, ESPL1, AURKA, AURKB, TACC3, UBE2C, RACGAP1, SPC25, SPAG5, CKS2, BUB1B, FBXO5 |
| 33 | 15 | Chromosome Segregation                                                                         | 3.29E-19 | 0.001 | 0.27  | KIFC1, DLGAP5, NUSAP1, CENPF, BIRC5, NDC80, ESPL1, AURKB, SMC4, SPC25, NCAPH, SPAG5, NCAPG, BUB1, TOP2A      |
| 33 | 10 | Regulation Of Mitotic Metaphase/Anaphase Transition                                            | 7.52E-17 | 0.001 | 0.18  | PLK1, DLGAP5, BUB1, FBXO5, TTK, CENPF, BUB1B, ESPL1, CDC20, UBE2C                                            |
| 33 | 12 | Regulation Of Nuclear Division                                                                 | 5.04E-16 | 0.001 | 0.21  | PLK1, DLGAP5, BUB1, FBXO5, TTK, CENPF, BUB1B, NUSAP1, ESPL1, AURKA, CDC20, UBE2C                             |
| 33 | 10 | Sister Chromatid Segregation                                                                   | 3.54E-15 | 0.001 | 0.18  | KIFC1, NCAPH, SPAG5, NCAPG, DLGAP5, NUSAP1, ESPL1, NDC80, TOP2A, SMC4                                        |
| 33 | 11 | Cytokinesis                                                                                    | 7.74E-15 | 0.001 | 0.2   | KIF23, PRC1, PLK1, NUSAP1, ESPL1, BIRC5, CEP55, AURKB, RACGAP1, ECT2, KIF20A                                 |
| 33 | 16 | Regulation Of Mitotic Cell Cycle                                                               | 4.53E-14 | 0.001 | 0.29  | DLGAP5, TPX2, TTK, NUSAP1, CENPF, BIRC5, ESPL1, AURKA, CDC20, UBE2C, PLK1, BUB1, BUB1B, FBXO5, CCNA2, TOP2A  |
| 33 | 13 | Regulation Of Cell Cycle Arrest                                                                | 2.68E-11 | 0.001 | 0.23  | FOXMI, TTK, CENPF, CDC20, BIRC5, MCM10, UBE2C, CCNB2, PLK1, BUB1, BUB1B, CCNA2, TOP2A                        |
| 33 | 7  | Spindle Checkpoint                                                                             | 4.26E-11 | 0.001 | 0.13  | BUB1, TTK, CENPF, BUB1B, BIRC5, CDC20, UBE2C                                                                 |
| 33 | 11 | Positive Regulation Of Cell Cycle Process                                                      | 5.12E-11 | 0.001 | 0.2   | KIF23, PLK1, DLGAP5, NUSAP1, ESPL1, AURKA, BIRC5, AURKB, RACGAP1, UBE2C, ECT2                                |
| 33 | 6  | Regulation Of Chromosome Segregation                                                           | 1.61E-10 | 0.001 | 0.11  | SPAG5, BUB1, ESPL1, AURKB, RACGAP1, ECT2                                                                     |
| 33 | 9  | Organelle Localization                                                                         | 9.74E-09 | 0.001 | 0.16  | CENPA, DLGAP5, CENPF, NUSAP1, ESPL1, NDC80, BIRC5, TACC3, ASPM                                               |
| 33 | 12 | Interphase Of Mitotic Cell Cycle                                                               | 1.01E-08 | 0.001 | 0.21  | CCNB2, PLK1, FOXMI, RRM2, FBXO5, CENPF, BIRC5, MCM10, TOP2A, KPNA2, CCNA2, MELK                              |
| 33 | 8  | Meiosis                                                                                        | 1.39E-08 | 0.001 | 0.14  | EXO1, MKI67, PLK1, CKS2, FBXO5, ESPL1, TOP2A, RAD54L                                                         |
| 33 | 7  | Anaphase-Promoting Complex-Dependent Proteasomal Ubiquitin-Dependent Protein Catabolic Process | 4.39E-08 | 0.002 | 0.13  | PLK1, FBXO5, BUB1B, AURKA, CDC20, AURKB, UBE2C                                                               |
| 33 | 4  | Mitotic Spindle                                                                                | 5.85E-08 | 0.002 | 0.071 | KIF23, SPAG5, RACGAP1, ECT2                                                                                  |
| 33 | 7  | Inositol Lipid-Mediated Signaling                                                              | 6.39E-08 | 0.002 | 0.13  | SPAG5, CKS2, BUB1B, AURKA, NDC80, UBE2C, TOP2A                                                               |
| 33 | 4  | Regulation Of Cell Cycle Cytokinesis                                                           | 3.24E-07 | 0.01  | 0.071 | KIF23, AURKB, RACGAP1, ECT2                                                                                  |
| 33 | 7  | Dna Packaging                                                                                  | 5.14E-07 | 0.013 | 0.13  | NCAPH, NCAPG, CENPA, OIP5, NUSAP1, TOP2A, SMC4                                                               |
| 33 | 4  | Establishment Of Mitotic Spindle Localization                                                  | 6.14E-07 | 0.015 | 0.071 | CENPA, NUSAP1, ESPL1, NDC80                                                                                  |
| 33 | 4  | Protein Localization To Chromosome                                                             | 1.72E-06 | 0.029 | 0.071 | PLK1, CENPA, BUB1B, AURKB                                                                                    |
| 33 | 6  | Regulation Of Microtubule-Based Process                                                        | 1.73E-06 | 0.03  | 0.11  | SPAG5, TPX2, AURKA, RACGAP1, TACC3, ECT2                                                                     |
