# Supplementary material for: A Computational Approach to Identifying Gene-microRNA Modules in Cancer
Source: PubMed Central journal article supplement (PMC4303261; doi:10.1371/journal.pcbi.1004042), 2015-01-22
Supplement: pcbi.1004042.s032.pdf [file pcbi.1004042.s032.pdf]

**Table S25.** Ovarian cancer specific genes and GBM specific genes in identified modules.

| Module ID | Ovarian cancer specific genes |
|-----------|-------------------------------|
| 1         | PTK2                          |
| 5         | PTK2                          |
| 6         | BARD1                         |
| 7         | PTK2                          |
| 8         | FN1                           |
| 12        | NBN                           |
| 13        | CDC42                         |
| 14        | MAP3K4                        |
| 15        | INSR                          |
| 17        | C11orf30                      |
| 19        | MAP3K3                        |
| 20        | MAD2L1,CDC20,AURKA            |
| 22        | FN1                           |
| 23        | ARID4B                        |
| 26        | MAD2L1                        |
| 27        | SERPINF1,FN1                  |
| 28        | HMG A1                        |
| 31        | RAB25,SERPINF1,CTSD,ACVR2B    |
| 32        | RAB25                         |
| 33        | AURKA,CDC20                   |

| Module ID | GBM specific genes |
|-----------|--------------------|
| 3         | TSC2               |
| 8         | PLCG2              |
| 22        | RPS6KA1,PLCG2      |
| 26        | HIPK2,SHC2         |
| 30        | PLCG2              |
| 32        | PDPK1              |
| 33        | PDGFA              |
| 39        | HIPK2              |
| 44        | TSC2               |
| 46        | TSC2               |
| 51        | RPS6KA1            |
