# Supplementary material for: A Computational Approach to Identifying Gene-microRNA Modules in Cancer
Source: PubMed Central journal article supplement (PMC4303261; doi:10.1371/journal.pcbi.1004042), 2015-01-22
Supplement: pcbi.1004042.s033.pdf [file pcbi.1004042.s033.pdf]

**Table S26. DNA copy number aberration regions that regulate gene expressions in ovarian cancer modules.**

| Module ID | DNA regions with copy number aberrations (CNAs) and PCC values between CNAs and genes                                                                                                                                                                                                                                                                                                                                         |
|-----------|-------------------------------------------------------------------------------------------------------------------------------------------------------------------------------------------------------------------------------------------------------------------------------------------------------------------------------------------------------------------------------------------------------------------------------|
| 1         | chr6:159800000-160099999(-0.201), chr6:160700000-160799999(-0.202), chr6:161100000-161199999(-0.201),<br>chr6:161600000-163099999(-0.208), chr6:163200000-163299999(-0.204), chr6:163800000-165899999(-0.209),<br>chr6:166100000-166599999(-0.209), chr6:166700000-166899999(-0.207), chr6:167300000-167499999(-0.209),<br>chr6:167600000-168199999(-0.205), chr6:168400000-170999999(-0.224), chr8:75000000-145299999(0.401) |
| 4         | chr19:55800000-55999999(-0.201)                                                                                                                                                                                                                                                                                                                                                                                               |
| 5         | chr8:102300000-145299999(0.289)                                                                                                                                                                                                                                                                                                                                                                                               |
| 7         | chr8:76600000-76799999(0.201), chr8:77000000-77999999(0.205), chr8:78200000-78299999(0.203), chr8:78400000-78499999(0.202),<br>chr8:78700000-78999999(0.201), chr8:79100000-79399999(0.201), chr8:80900000-80999999(0.203), chr8:82400000-82699999(0.202),<br>chr8:83400000-83499999(0.201), chr8:83900000-84099999(0.202), chr8:84200000-84299999(0.2), chr8:84800000-84899999(0.2),<br>chr8:87100000-145299999(0.365)       |
| 9         | chr1:32100000-53399999(0.301), chr1:53600000-53699999(0.2), chr1:54100000-54199999(0.2), chr1:54300000-54599999(0.206),<br>chr1:54800000-54899999(0.204), chr1:55000000-55099999(0.201)                                                                                                                                                                                                                                       |
| 10        | chr12:800000-39599999(0.357), chr12:40400000-40499999(0.201), chr12:40700000-40799999(0.21), chr12:41600000-41699999(0.2)                                                                                                                                                                                                                                                                                                     |
| 11        | chr16:600000-14699999(0.292), chr16:14800000-18799999(0.225)                                                                                                                                                                                                                                                                                                                                                                  |
| 12        | chr6:1000000-1699999(0.204), chr6:2000000-26199999(0.231), chr6:26300000-27699999(0.208), chr6:28000000-28399999(0.202),<br>chr6:28600000-29399999(0.205), chr6:29900000-30399999(0.204), chr6:31300000-32999999(0.206), chr6:33600000-34499999(0.205),<br>chr6:35600000-35699999(0.204)                                                                                                                                      |
| 16        | chr19:8200000-22299999(0.377), chr19:22500000-22799999(0.208), chr19:22900000-23199999(0.203)                                                                                                                                                                                                                                                                                                                                 |
| 17        | chr12:39200000-39499999(0.204), chr12:40100000-40699999(0.213), chr12:41100000-43299999(0.212),<br>chr12:47400000-47599999(0.207), chr12:47700000-73199999(0.264), chr12:73600000-73699999(0.201),<br>chr12:73900000-74299999(0.203), chr12:74400000-74699999(0.202)                                                                                                                                                          |
| 21        | chr2:230300000-230399999(-0.201), chr4:156900000-156999999(0.203), chr4:157300000-159299999(0.206),<br>chr4:159400000-159599999(0.205), chr22:40500000-41699999(0.213), chr22:45500000-45599999(0.202)                                                                                                                                                                                                                        |
| 23        | chr1:158200000-159599999(0.207), chr1:160300000-160799999(0.203), chr1:160900000-160999999(0.201),<br>chr1:161500000-162199999(0.206), chr1:162500000-162699999(0.202), chr1:162800000-169299999(0.219),<br>chr1:169600000-169899999(0.203), chr1:170000000-171299999(0.207), chr1:171600000-171799999(0.2),<br>chr1:172200000-180399999(0.217), chr1:180600000-247899999(0.319)                                              |
| 28        | chr19:8600000-8699999(0.203), chr19:8800000-21199999(0.263)                                                                                                                                                                                                                                                                                                                                                                   |
| 29        | chr1:31900000-59099999(0.345), chr1:60000000-61899999(0.209), chr1:62000000-62299999(0.203), chr1:62700000-63499999(0.207)                                                                                                                                                                                                                                                                                                    |
| 30        | chr6:1000000-70199999(0.366), chr6:70700000-71799999(0.206), chr6:72400000-72599999(0.201), chr6:73000000-73799999(0.207),<br>chr6:74100000-74199999(0.201)                                                                                                                                                                                                                                                                   |
